# Supplementary material for: Morpholine catalyzed direct C3 alkenylation of indoles with α,β-unsaturated aldehydes
Source: Royal Society of Chemistry journal article supplement (doi:10.1039/c1cc12220g), 2011-01-01

## Morpholine Catalyzed Direct C3 Alkenylation of Indoles with $\alpha,\beta$ -Unsaturated Aldehydes

Shi-Kai Xiang,<sup>a</sup> Bo Zhang,<sup>a</sup> Li-He Zhang,<sup>a</sup> Yuxin Cui,<sup>a</sup> and Ning Jiao<sup>\*a,b</sup>

<sup>a</sup> State Key Laboratory of Natural and Biomimetic Drugs, School of Pharmaceutical Sciences, Peking University, Xue Yuan Rd. 38, Beijing 100191, China,

<sup>b</sup> Shanghai Key Laboratory of Green Chemistry and Chemical Processes, Department of Chemistry, East China Normal University, Shanghai 200062, China

E-mail: jiaoning@bjmu.edu.cn

Fax: (+86)10-82805297

### Supporting Information

#### Table of contents

|                                                          |     |
|----------------------------------------------------------|-----|
| General remarks                                          | S2  |
| Experimental procedures and characterization of products | S2  |
| Mechanistic experiments                                  | S9  |
| NMR spectra of compounds                                 | S11 |

## General Remarks

**General:** All manipulations were conducted with Schlenk tube. <sup>1</sup>H-NMR spectra were recorded on Bruker AVIII-400 spectrometers. Chemical shifts are reported in ppm referenced to the internal solvent peaks of methanol-d<sub>4</sub> and DMSO-d<sub>6</sub>, at 3.30 ppm and 2.49 ppm for <sup>1</sup>H NMR and 49.0 ppm and 39.5 ppm for <sup>13</sup>C NMR, respectively. Mass spectra were obtained using electrospray ionization (ESI) mass spectrometer. Unless otherwise noted, materials and solvents obtained from commercial suppliers were used without further purification. Morpholine•TFA was prepared with morpholine and trifluoroacetic acid in Et<sub>2</sub>O.

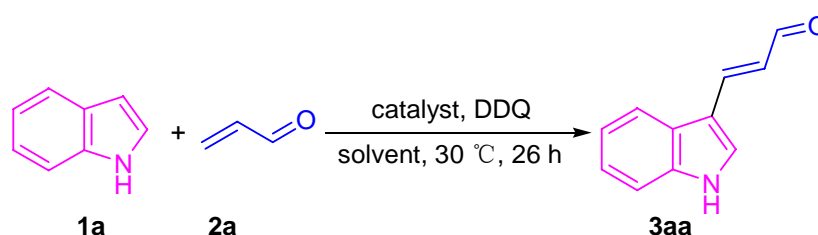

| entry    | catalyst (mol%)            | solvent                         | yield (%) <sup>b</sup> |
|----------|----------------------------|---------------------------------|------------------------|
| <b>1</b> | <b>morpholine•TFA (20)</b> | <b>THF</b>                      | <b>95</b>              |
| 2        | morpholine•TFA (20)        | CH <sub>2</sub> Cl <sub>2</sub> | 15                     |
| 3        | morpholine•TFA (20)        | DCE                             | trace                  |
| 4        | morpholine•TFA (20)        | toluene                         | ND                     |
| 5        | morpholine•TFA (20)        | MeCN                            | 80                     |
| 6        | morpholine•TFA (20)        | MeNO <sub>2</sub>               | 29                     |
| 7        | morpholine•TFA (20)        | dioxane                         | 90                     |

## Experimental Section

### (*E*)-3-(1H-Indol-3-yl)acrylaldehyde (**3aa**)

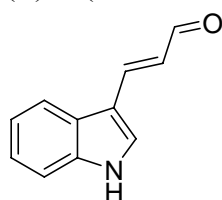

Morpholine•TFA (16.1 mg, 0.08 mmol), indole **1a** (46.8 mg, 0.4 mmol), were mixed in 3.0 mL THF. The acrolein **2a** (67.2 mg, 1.2 mmol) was added to the reaction mixture. The reaction was stirred for 24 h at 30 °C, then DDQ (118.0 mg, 0.52 mmol) was added and the reaction continues for another 2 h. The crude reaction mixture was directly purified by flash chromatography column using hexane/acetone/Et<sub>3</sub>N = 300/100/3 as the eluent to afford 65.0 mg (95% yield) of *E*-**3aa**. IR:(KBr)  $\nu_{\max}$  3278, 1649, 1604, 1505, 1117 cm<sup>-1</sup>; <sup>1</sup>H-NMR (400 MHz, CD<sub>3</sub>OD, ppm)  $\delta$  9.44 (d, *J* = 8.0 Hz, 1H), 7.83-7.78 (m, 2H), 7.74 (s, 1H), 7.45-7.42 (m, 1H), 7.25-7.16 (m, 2H), 6.68 (dd, *J* = 15.4 Hz, 8.0 Hz, 1H); <sup>13</sup>C-NMR (100 MHz, CD<sub>3</sub>OD, ppm)  $\delta$  196.6, 150.8, 139.4, 133.8, 126.5, 124.3, 123.9, 122.7, 121.1, 114.4, 113.4;

HRMS  $m/z$  (ESI): Calcd. for  $C_{11}H_{10}NO$   $[M+H]^+$  172.0757, Found: 172.0757.

(*E*)-3-(5-Methyl-1H-indol-3-yl)acrylaldehyde (**3ba**)

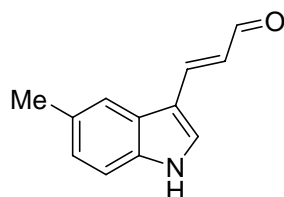

Morpholine•TFA (16.1 mg, 0.08 mmol), 5-methyl-indole **1b** (52.4 mg, 0.4 mmol), were mixed in 3.0 mL THF. The acrolein **2a** (67.2 mg, 1.2 mmol) was added to the reaction mixture. The reaction was stirred for 24 h at 30 °C, then DDQ (118.0 mg, 0.52 mmol) was added and the reaction continues for another 2 h. The crude reaction mixture was directly purified by flash chromatography column using hexane/acetone/ $Et_3N$  = 300/100/3 as the eluent to afford 69.8 mg (94% yield) of *E*-**3ba**. IR:(KBr)  $\nu_{max}$  3269, 1647, 1603, 1579, 1508, 1417, 1124  $cm^{-1}$ ;  $^1H$ -NMR (400 MHz,  $CD_3OD$ , ppm)  $\delta$  9.44 (d,  $J$  = 8.4 Hz, 1H), 7.82 (d,  $J$  = 15.6 Hz, 1H), 7.72 (s, 1H), 7.62 (s, 1H), 7.32 (d,  $J$  = 8.4 Hz, 1H), 7.06 (d,  $J$  = 8.0 Hz, 1H), 6.68 (dd,  $J$  = 15.6 Hz, 8.4 Hz, 1H), 2.44 (s, 3H);  $^{13}C$ -NMR (100 MHz,  $CD_3OD$ , ppm)  $\delta$  196.6, 151.0, 137.7, 133.9, 132.3, 126.8, 125.8, 123.7, 120.9, 114.1, 113.0, 21.7; HRMS  $m/z$  (ESI): Calcd. for  $C_{12}H_{12}NO$   $[M+H]^+$  186.0913, Found: 186.0912.

(*E*)-3-(2-Methyl-1H-indol-3-yl)acrylaldehyde (**3ca**)

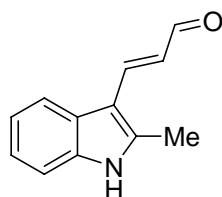

Morpholine•TFA (16.1 mg, 0.08 mmol), 2-methyl-indole **1c** (52.4 mg, 0.4 mmol), were mixed in 3.0 mL THF. The acrolein **2a** (67.2 mg, 1.2 mmol) was added to the reaction mixture. The reaction was stirred for 24 h at 0 °C, then DDQ (118.0 mg, 0.52 mmol) was added and the reaction continues for another 2 h. The crude reaction mixture was directly purified by flash chromatography column using hexane/acetone/ $Et_3N$  = 300/100/3 as the eluent to afford 52.1 mg (70% yield) of *E*-**3ca**. IR:(KBr)  $\nu_{max}$  3244, 1649, 1598, 1573, 1458, 1422, 1142  $cm^{-1}$ ;  $^1H$ -NMR (400 MHz,  $CD_3OD$ , ppm)  $\delta$  9.42 (d,  $J$  = 7.2 Hz, 1H), 7.82 (d,  $J$  = 14.8 Hz, 1H), 7.74-7.70 (m, 1H), 7.33-7.30 (m, 1H), 7.17-7.12 (m, 2H), 6.62 (dd,  $J$  = 15.6 Hz, 8.0 Hz, 1H), 2.52 (s, 3H);  $^{13}C$ -NMR (100 MHz,  $CD_3OD$ , ppm)  $\delta$  196.6, 149.8, 145.6, 138.0, 127.4, 123.6, 122.7, 120.7, 112.5, 110.9, 11.9; HRMS  $m/z$  (ESI): Calcd. for  $C_{12}H_{12}NO$   $[M+H]^+$  186.0913, Found: 186.0911.

(*E*)-3-(5-Methoxy-1H-indol-3-yl)acrylaldehyde (**3da**)

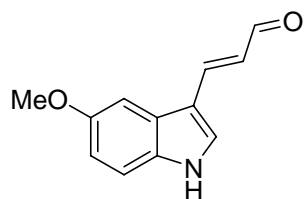

Morpholine•TFA (16.1 mg, 0.08 mmol), 5-methoxy-indole **1d** (58.6 mg, 0.4 mmol), were mixed in 3.0 mL THF. The acrolein **2a** (67.2 mg, 1.2 mmol) was added to the reaction mixture. The reaction was stirred for 24 h at 10 °C, then DDQ (118.0 mg, 0.52 mmol) was added and the reaction continues for another 2 h. The crude reaction mixture was directly purified by flash chromatography column using hexane/acetone/Et<sub>3</sub>N = 250/100/3 as the eluent to afford 68.2 mg (85% yield) of *E*-**3da**. IR:(KBr)  $\nu_{\max}$  3161, 1641, 1601, 1508, 1479, 1439, 1119 cm<sup>-1</sup>; <sup>1</sup>H-NMR (400 MHz, CD<sub>3</sub>OD, ppm)  $\delta$  9.44 (d, *J* = 8.4 Hz, 1H), 7.83 (d, *J* = 15.2 Hz, 1H), 7.73 (s, 1H), 7.33 (d, *J* = 8.8 Hz, 1H), 7.27 (d, *J* = 2.4 Hz, 1H), 6.88 (dd, *J* = 9.0 Hz, 2.4 Hz, 1H), 6.62 (dd, *J* = 15.6 Hz, 8.0 Hz, 1H), 3.83 (s, 3H); <sup>13</sup>C-NMR (100 MHz, CD<sub>3</sub>OD, ppm)  $\delta$  196.5, 157.2, 150.9, 134.2, 134.0, 127.3, 123.3, 114.3, 114.1, 114.0, 103.3, 56.2; HRMS *m/z* (ESI): Calcd. for C<sub>12</sub>H<sub>12</sub>NO<sub>2</sub> [M+H]<sup>+</sup> 202.0863, Found: 202.0860.

*(E)*-3-(5-(Benzyloxy)-1H-indol-3-yl)acrylaldehyde (**3ea**)

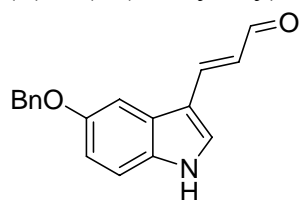

Morpholine•TFA (16.1 mg, 0.08 mmol), 5-benzyloxy-indole **1e** (83.6 mg, 0.37 mmol), were mixed in 3.0 mL THF. The acrolein **2a** (67.2 mg, 1.2 mmol) was added to the reaction mixture. The reaction was stirred for 24 h at 30 °C, then DDQ (118.0 mg, 0.52 mmol) was added and the reaction continues for another 2 h. The crude reaction mixture was directly purified by flash chromatography column using hexane/acetone/Et<sub>3</sub>N = 250/100/3 as the eluent to afford 63.8 mg (61% yield) of *E*-**3ea**. IR:(KBr)  $\nu_{\max}$  3279, 1651, 1606, 1510, 1479, 1431, 1125 cm<sup>-1</sup>; <sup>1</sup>H-NMR (400 MHz, CD<sub>3</sub>OD, ppm)  $\delta$  9.44 (d, *J* = 8.0 Hz, 1H), 7.82 (d, *J* = 15.6 Hz, 1H), 7.73 (s, 1H), 7.46 (d, *J* = 7.6 Hz, 2H), 7.36-7.33 (m, 4H), 7.29 (d, *J* = 7.2 Hz, 1H), 6.96 (d, *J* = 7.6 Hz, 1H), 6.60 (dd, *J* = 15.6 Hz, 8.0 Hz, 1H), 5.10 (s, 2H); <sup>13</sup>C-NMR (100 MHz, CD<sub>3</sub>OD, ppm)  $\delta$  196.5, 156.2, 150.8, 139.1, 134.4, 134.1, 129.5, 128.8, 128.7, 127.2, 123.5, 114.8, 114.4, 114.1, 105.1, 71.9; HRMS *m/z* (ESI): Calcd. for C<sub>18</sub>H<sub>16</sub>NO<sub>2</sub> [M+H]<sup>+</sup> 278.1176, Found: 278.1170.

*(E)*-3-(5-Bromo-1H-indol-3-yl)acrylaldehyde (**3fa**)

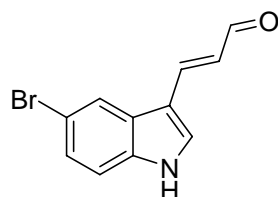

Morpholine•TFA (16.1 mg, 0.08 mmol), 5-bromo-indole **1f** (78.4 mg, 0.4 mmol), were mixed in 3.0 mL THF. The acrolein **2a** (67.2 mg, 1.2 mmol) was added to the reaction mixture. The reaction was stirred for 24 h at 40 °C, then DDQ (118.0 mg, 0.52 mmol) was added and the reaction continues for another 2 h. The crude reaction mixture was directly purified by flash chromatography column using hexane/acetone/Et<sub>3</sub>N = 300/100/3 as the eluent to afford 81.4 mg (81% yield) of *E*-**3fa**. IR:(KBr)  $\nu_{\max}$  3145, 1644, 1604, 1507, 1475, 1429, 1119 cm<sup>-1</sup>; <sup>1</sup>H-NMR (400 MHz, CD<sub>3</sub>OD, ppm)  $\delta$  9.47 (d, *J* = 8.4 Hz, 1H), 7.93 (d, *J* = 1.6 Hz, 1H), 7.82-7.77 (m, 2H), 7.36-7.29 (m, 2H), 6.60 (dd, *J* = 15.6 Hz, 7.6 Hz, 1H); <sup>13</sup>C-NMR (100 MHz, CD<sub>3</sub>OD, ppm)  $\delta$  196.4, 149.5, 137.9, 134.1, 128.3, 127.0, 124.5, 123.5, 115.9, 115.0, 113.8; HRMS *m/z* (ESI): Calcd. for C<sub>11</sub>H<sub>9</sub>BrNO [M+H]<sup>+</sup> 249.9862, Found: 249.9856.

(*E*)-3-(4-Bromo-1H-indol-3-yl)acrylaldehyde (**3ga**)

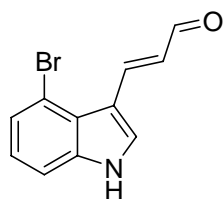

Morpholine•TFA (16.1 mg, 0.08 mmol), 4-bromo-indole **1g** (78.4 mg, 0.4 mmol), were mixed in 3.0 mL THF. The acrolein **2a** (67.2 mg, 1.2 mmol) was added to the reaction mixture. The reaction was stirred for 48 h at 40 °C, then DDQ (118.0 mg, 0.52 mmol) was added and the reaction continues for another 2 h. The crude reaction mixture was directly purified by flash chromatography column using hexane/acetone/Et<sub>3</sub>N = 300/100/3 as the eluent to afford 48.7 mg (49% yield) of *E*-**3ga**. IR:(KBr)  $\nu_{\max}$  3107, 1652, 1603, 1506, 1312, 1155 cm<sup>-1</sup>; <sup>1</sup>H-NMR (400 MHz, DMSO-d<sub>6</sub>, ppm)  $\delta$  9.57 (d, *J* = 7.6 Hz, 1H), 8.58 (d, *J* = 15.6 Hz, 1H), 8.37 (s, 1H), 7.50 (d, *J* = 7.6 Hz, 1H), 7.36 (d, *J* = 6.8 Hz, 1H), 7.12-7.07 (m, 1H), 6.73 (dd, *J* = 15.0 Hz, 8.0 Hz, 1H); <sup>13</sup>C-NMR (100 MHz, DMSO-d<sub>6</sub>, ppm)  $\delta$  193.5, 146.4, 138.1, 129.7, 125.4, 124.0, 123.7, 123.5, 112.7, 112.3, 112.2; HRMS *m/z* (ESI): Calcd. for C<sub>11</sub>H<sub>9</sub>BrNO [M+H]<sup>+</sup> 249.9862, Found: 249.9859.

(*E*)-3-(5-Fluoro-1H-indol-3-yl)acrylaldehyde (**3ha**)

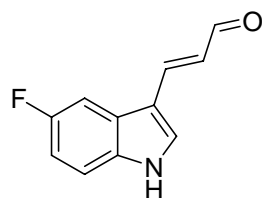

Morpholine•TFA (16.1 mg, 0.08 mmol), 5-fluoro-indole **1h** (54.0 mg, 0.4 mmol), were mixed in 3.0 mL THF. The Acrolein **2a** (67.2 mg, 1.2 mmol) was added to the reaction mixture. The reaction was stirred for 24 h at 30 °C, then DDQ (118.0 mg, 0.52mmol) was added and the reaction continues for another 2 h. The crude reaction mixture was directly purified by flash chromatography column using hexane/acetone/Et<sub>3</sub>N = 300/100/3 as the eluent to afford 64.0 mg (85% yield) of *E*-**3ha**. IR:(KBr)  $\nu_{\max}$  3261, 1650, 1606, 1511, 1470, 1424, 1116 cm<sup>-1</sup>; <sup>1</sup>H-NMR (400

MHz, CD<sub>3</sub>OD, ppm)  $\delta$  9.47 (d,  $J$  = 8.4 Hz, 1H), 7.85-7.80 (m, 2H), 7.53-7.49 (m, 1H), 7.43-7.39 (m, 1H), 7.03-6.97 (m, 1H), 6.62 (dd,  $J$  = 15.8 Hz, 8.0 Hz, 1H); <sup>13</sup>C-NMR (100 MHz, CD<sub>3</sub>OD, ppm)  $\delta$  196.5, 160.4 ( $J$  = 235.3 Hz), 150.2, 135.8, 134.9, 127.2, 124.1, 114.4 ( $J$  = 5.7 Hz), 114.3, 112.3 ( $J$  = 25.6 Hz), 106.1 ( $J$  = 24.4 Hz); HRMS  $m/z$  (ESI): Calcd. for C<sub>11</sub>H<sub>9</sub>FNO [M+H]<sup>+</sup> 190.0663, Found: 190.0658.

(*E*)-3-(6-Chloro-1H-indol-3-yl)acrylaldehyde (**3ia**)

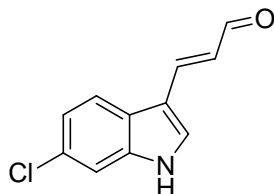

Morpholine•TFA (16.1 mg, 0.08 mmol), 6-chloro-indole **1i** (64.0 mg, 0.4 mmol), were mixed in 3.0 mL THF. The acrolein **2a** (67.2 mg, 1.2 mmol) was added to the reaction mixture. The reaction was stirred for 24 h at 30 °C, then DDQ (118.0 mg, 0.52 mmol) was added and the reaction continues for another 2 h. The crude reaction mixture was directly purified by flash chromatography column using hexane/acetone/Et<sub>3</sub>N = 300/100/3 as the eluent to afford 73.9 mg (90% yield) of *E*-**3ia**. IR:(KBr)  $\nu_{\max}$  3272, 1657, 1607, 1510, 1117 cm<sup>-1</sup>; <sup>1</sup>H-NMR (400 MHz, CD<sub>3</sub>OD, ppm)  $\delta$  9.48 (d,  $J$  = 8.0 Hz, 1H), 7.82-7.75 (m, 3H), 7.43 (d,  $J$  = 1.6 Hz, 1H), 7.18-7.14 (m, 1H), 6.66 (dd,  $J$  = 16.0 Hz, 8.0 Hz, 1H); <sup>13</sup>C-NMR (100 MHz, CD<sub>3</sub>OD, ppm)  $\delta$  196.5, 149.7, 139.7, 134.1, 130.0, 125.2, 124.7, 123.0, 122.0, 114.4, 113.2; HRMS  $m/z$  (ESI): Calcd. for C<sub>11</sub>H<sub>9</sub>ClNO [M+H]<sup>+</sup> 206.0367, Found: 206.0361.

(*E*)-Methyl 3-(3-oxoprop-1-enyl)-1H-indole-5-carboxylate (**3ja**)

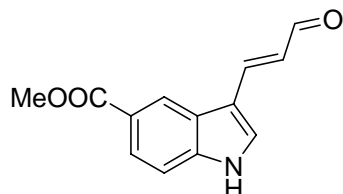

Morpholine•TFA (8.0 mg, 0.04 mmol), methyl 1H-indole-5-carboxylate **1j** (35.0 mg, 0.2 mmol), were mixed in 2.0 mL THF. The acrolein **2a** (33.6 mg, 0.6 mmol) was added to the reaction mixture. The reaction was stirred for 48 h at 40 °C, then DDQ (59.0 mg, 0.26 mmol) was added and the reaction continues for another 2 h. The crude reaction mixture was directly purified by flash chromatography column using hexane/acetone/Et<sub>3</sub>N = 200/100/3 as the eluent to afford 27.8 mg (61% yield) of *E*-**3ja**. IR:(KBr)  $\nu_{\max}$  3143, 1712, 1647, 1607, 1442, 1283, 1237, 1114, 764 cm<sup>-1</sup>; <sup>1</sup>H-NMR (400 MHz, DMSO-d<sub>6</sub>, ppm)  $\delta$  9.59 (d,  $J$  = 7.6 Hz, 1H), 8.51 (s, 1H), 8.19 (s, 1H), 7.99 (d,  $J$  = 16.4 Hz, 1H), 7.85 (dd,  $J$  = 8.8 Hz, 1.2 Hz, 1H), 7.58 (d, 1H), 6.67 (dd,  $J$  = 16.0 Hz, 8.4 Hz, 1H), 3.87 (s, 3H); <sup>13</sup>C-NMR (100 MHz, DMSO-d<sub>6</sub>, ppm)  $\delta$  193.8, 166.9, 146.6, 139.8, 133.1, 124.8, 124.1, 123.6, 122.6, 121.6, 113.0, 112.6, 51.9; HRMS  $m/z$  (ESI): Calcd. for C<sub>13</sub>H<sub>12</sub>NO<sub>3</sub> [M+H]<sup>+</sup> 230.0812, Found: 230.0806.

(*E*)-Methyl 3-(3-oxoprop-1-enyl)-1H-indole-6-carboxylate (**3ka**)

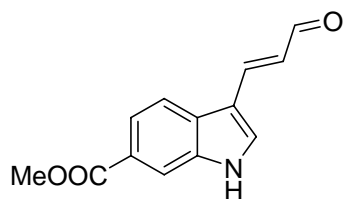

Morpholine•TFA (16.1 mg, 0.08 mmol), methyl 1H-indole-6-carboxylate **1k** (70.0 mg, 0.2 mmol), were mixed in 3.0 mL THF. The acrolein **2a** (67.2 mg, 1.2 mmol) was added to the reaction mixture. The reaction was stirred for 48 h at 40 °C, then DDQ (118.0 mg, 0.52 mmol) was added and the reaction continues for another 2 h. The crude reaction mixture was directly purified by flash chromatography column using hexane/acetone/Et<sub>3</sub>N = 200/100/3 as the eluent to afford 45.8 mg (50% yield) of *E*-**3ka**. IR:(KBr)  $\nu_{\max}$  3232, 1709, 1650, 1608, 1497, 1454, 1425, 1287, 1213, 1143, 1086, 764, 739 cm<sup>-1</sup>; <sup>1</sup>H-NMR (400 MHz, DMSO-d<sub>6</sub>, ppm)  $\delta$  9.56 (d, *J* = 8.0 Hz, 1H), 8.25 (s, 1H), 8.11 (s, 1H), 8.00 (d, *J* = 8.8 Hz, 1H), 7.91 (d, *J* = 16.0 Hz, 1H), 7.77 (d, *J* = 7.6 Hz, 1H), 6.72 (dd, *J* = 15.2 Hz, 7.6 Hz, 1H), 3.86 (s, 3H); <sup>13</sup>C-NMR (100 MHz, DMSO-d<sub>6</sub>, ppm)  $\delta$  193.8, 166.8, 146.8, 136.6, 134.9, 128.6, 124.0, 123.8, 121.8, 119.7, 114.2, 112.3, 52.0; HRMS *m/z* (ESI): Calcd. for C<sub>13</sub>H<sub>12</sub>NO<sub>3</sub> [M+H]<sup>+</sup> 230.0812, Found: 230.0806.

#### (*E*)-3-(2-Phenyl-1H-indol-3-yl)acrylaldehyde (**3la**)

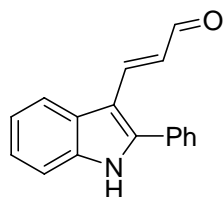

Morpholine•TFA (16.1 mg, 0.08 mmol), 2-phenyl-indole **1l** (77.2 mg, 0.4 mmol), were mixed in 3.0 mL THF. The acrolein **2a** (67.2 mg, 1.2 mmol) was added to the reaction mixture. The reaction was stirred for 24 h at 30 °C, then DDQ (118.0 mg, 0.52 mmol) was added and the reaction continues for another 2 h. The crude reaction mixture was directly purified by flash chromatography column using hexane/acetone/Et<sub>3</sub>N = 300/100/3 as the eluent to afford 82.2 mg (83% yield) of *E*-**3la**. IR:(KBr)  $\nu_{\max}$  3255, 1639, 1598, 1574, 1452, 1423, 1138 cm<sup>-1</sup>; <sup>1</sup>H-NMR (400 MHz, CD<sub>3</sub>OD, ppm)  $\delta$  9.41 (d, *J* = 7.6 Hz, 1H), 7.92-7.82 (m, 2H), 7.64-7.46 (m, 6H), 7.30-7.22 (m, 2H), 6.81 (dd, *J* = 16.0 Hz, 7.6 Hz, 1H); <sup>13</sup>C-NMR (100 MHz, DMSO-d<sub>6</sub>, ppm)  $\delta$  194.1, 147.1, 144.3, 136.8, 130.7, 129.7, 129.4, 129.1, 125.7, 124.0, 123.3, 121.8, 120.5, 112.3, 108.7; HRMS *m/z* (ESI): Calcd. for C<sub>17</sub>H<sub>14</sub>NO [M+H]<sup>+</sup> 248.1070, Found: 248.1066.

#### 3-(1H-Indol-3-yl)but-2-enal (**3ab**)

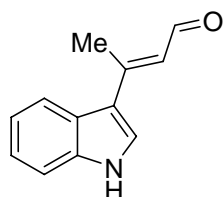

Morpholine•TFA (16.1 mg, 0.08 mmol), indole **1a** (46.8 mg, 0.4 mmol), were mixed in 3.0 mL THF. The Crotonaldehyde **2b** (84.0 mg, 1.2 mmol) was added to the reaction mixture. The reaction was stirred for 24 h at 10 °C, then DDQ (118.0 mg, 0.52 mmol) was added and the reaction continues for another 2 h. The crude reaction mixture was directly purified by flash chromatography column using hexane/acetone/Et<sub>3</sub>N = 300/100/3 as the eluent to afford 42.3 mg (57% yield, *E/Z* = 96:4) of **3ab**. IR: (KBr)  $\nu_{\max}$  3164, 1626, 1586, 1567, 1513, 1489, 1429, 1384, 1172, 738 cm<sup>-1</sup>; <sup>1</sup>H-NMR (400 MHz, CD<sub>3</sub>OD, ppm): *E-3ab*  $\delta$  10.03 (d, *J* = 8.8 Hz, 1H), 7.87-7.84 (m, 1H), 7.80 (s, 1H), 7.44-7.41 (m, 1H), 7.21-7.12 (m, 2H), 6.67-6.64 (m, 1H), 2.57 (d, *J* = 0.8 Hz, 3H), *Z-3ab*  $\delta$  9.57 (d, *J* = 8.0 Hz, 1H), 6.05 (m, 1H), 2.40 (d, *J* = 1.2 Hz, 3H); HRMS *m/z* (ESI): Calcd. for C<sub>12</sub>H<sub>12</sub>NO [M+H]<sup>+</sup> 186.0913, Found: 186.0909.

### 3-(1H-Indol-3-yl)pent-2-enal (**3ac**)

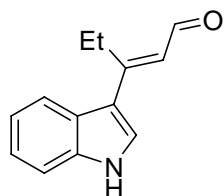

Morpholine•TFA (16.1 mg, 0.08 mmol), indole **1a** (46.8 mg, 0.4 mmol), were mixed in 3.0 mL THF. The (*E*)-pent-2-enal **2c** (100.8 mg, 1.2 mmol) was added to the reaction mixture. The reaction was stirred for 48 h at 30 °C, then DDQ (118.0 mg, 0.52 mmol) was added and the reaction continues for another 2 h. The crude reaction mixture was directly purified by flash chromatography column using hexane/acetone/Et<sub>3</sub>N = 300/100/3 as the eluent to afford 40.3 mg (51% yield, *E/Z* = 82:18) of **3ac**. IR: (KBr)  $\nu_{\max}$  3214, 1626, 1584, 1569, 1508, 1430, 1171, 1126, 741 cm<sup>-1</sup>; <sup>1</sup>H-NMR (400 MHz, CD<sub>3</sub>OD, ppm): *E-3ac*  $\delta$  10.06 (d, *J* = 8.4 Hz, 1H), 7.87-7.85 (m, 2H), 7.46-7.43 (m, 1H), 7.21-7.16 (m, 2H), 6.59 (d, *J* = 8.0 Hz, 1H), 3.12 (q, *J* = 7.3 Hz, 2H), 1.32 (t, *J* = 5.1 Hz, 3H), *Z-3ac*  $\delta$  9.55 (d, *J* = 8.0 Hz, 1H), 6.10 (d, *J* = 8.0 Hz, 1H), 3.12 (m, 2H), 1.10 (t, *J* = 7.2 Hz, 3H); HRMS *m/z* (ESI): Calcd. for C<sub>13</sub>H<sub>14</sub>NO [M+H]<sup>+</sup> 200.1070, Found: 200.1067.

### 3-(1H-Indol-3-yl)-3-phenylacrylaldehyde (**3ad**)

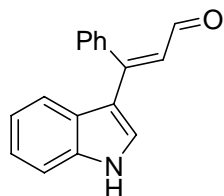

Morpholine•TFA (16.1 mg, 0.08 mmol), indole **1a** (46.8 mg, 0.4 mmol), were mixed in 3.0 mL THF. The *trans*-Cinnamaldehyde **2d** (79.2 mg, 0.6 mmol) was added to the reaction mixture. The reaction was stirred for 24 h at 60 °C, then DDQ (118.0 mg, 0.52 mmol) was added and the reaction continues for another 2 h. The crude reaction mixture was directly purified by flash chromatography column using hexane/acetone/Et<sub>3</sub>N = 300/100/3 as the eluent to afford 40.3 mg (41% yield,



major/minor = 89:11) of **3ad**. IR:(KBr)  $\nu_{\max}$  3242, 1630, 1559, 1496, 1357, 1167, 1135, 747, 729  $\text{cm}^{-1}$ ; Major product:  $^1\text{H-NMR}$  (400 MHz,  $\text{CD}_3\text{OD}$ , ppm): major product:  $\delta$  9.29 (d,  $J = 8.0$  Hz, 1H), 7.66-7.63 (m, 1H), 7.52-7.42 (m, 6H), 7.25-7.14 (m, 3H), 6.80-6.76 (m, 1H), minor product:  $\delta$  9.62 (d,  $J = 7.6$  Hz, 1H), 6.43 (m, 1H); HRMS  $m/z$  (ESI): Calcd. for  $\text{C}_{17}\text{H}_{14}\text{NO}$   $[\text{M}+\text{H}]^+$  248.1070, Found: 248.1068.

(*E*)-3-(5-Methoxy-1H-indol-3-yl)-2-methylacrylaldehyde (**3de**)

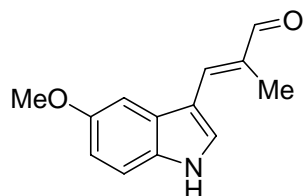

Morpholine•TFA (16.1 mg, 0.08 mmol), 5-methoxy-indole **1d** (58.8 mg, 0.4 mmol), were mixed in 3.0 mL THF. The methacrylaldehyde **2e** (84.0 mg, 1.2 mmol) was added to the reaction mixture. The reaction was stirred for 24 h at 70 °C, then DDQ (118.0 mg, 0.52 mmol) was added and the reaction continues for another 2 h. The crude reaction mixture was directly purified by flash chromatography column using hexane/acetone/ $\text{Et}_3\text{N}$  = 250/100/3 as the eluent to afford 45.8 mg (53% yield) of *E*-**3de**. IR:(KBr)  $\nu_{\max}$  3166, 1644, 1603, 1508, 1488, 1445, 1247  $\text{cm}^{-1}$ ;  $^1\text{H-NMR}$  (400 MHz,  $\text{CD}_3\text{OD}$ , ppm)  $\delta$  9.47 (s, 1H), 7.76 (s, 1H), 7.74 (s, 1H), 7.35-7.31 (m, 2H), 6.87 (dd,  $J = 8.8$  Hz, 2.4 Hz, 1H), 3.86 (s, 3H), 2.03 (d,  $J = 0.8$  Hz, 3H);  $^{13}\text{C-NMR}$  (100 MHz,  $\text{CD}_3\text{OD}$ , ppm)  $\delta$  196.4, 156.7, 144.9, 132.8, 132.6, 130.1, 129.7, 114.2, 113.8, 113.6, 101.2, 56.2, 11.4; HRMS  $m/z$  (ESI): Calcd. for  $\text{C}_{13}\text{H}_{14}\text{NO}_2$   $[\text{M}+\text{H}]^+$  216.1019, Found: 216.1014.

### Mechanistic experiments

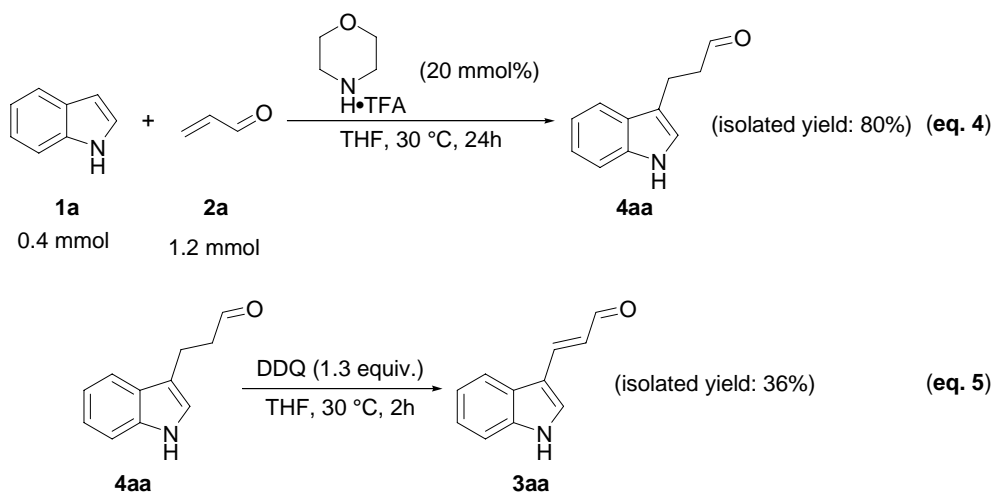

Morpholine•TFA (16.1 mg, 0.08 mmol), indole **1a** (46.8 mg, 0.4 mmol), were mixed in 3.0 mL THF. The acrolein **2a** (67.2 mg, 1.2 mmol) was added to the reaction mixture. After the reaction was stirred for 24 h at 30 °C, the crude mixture was directly purified by flash chromatography column using hexane/ethyl acetate = 5/1 as the eluent to afford 55.6 mg (80% yield) of **4aa**. The generated **4aa** (55.6 mg)

was dissolved in 3.0 mL THF, then DDQ (73.0 mg) was added to the mixture. After the reaction was stirred for 2 h at 30 °C, the mixture was directly purified by flash chromatography column using hexane/acetone/Et<sub>3</sub>N = 300/100/3 as the eluent to afford 20.0 mg (36% yield) of **3aa**.

3-(1H-indol-3-yl)propanal (**4aa**)

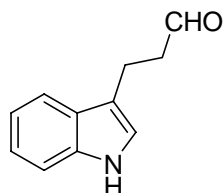

<sup>1</sup>H-NMR (400 MHz, CDCl<sub>3</sub>, ppm) δ 9.79 (t, *J* = 1.6 Hz, 1H), 7.98 (br, 1H), 7.56 (d, *J* = 7.6 Hz, 1H), 7.30 (d, *J* = 8.0 Hz, 1H), 7.21-7.16 (m, 1H), 7.14-7.09 (m, 1H), 6.91-6.89 (m, 1H), 3.08 (t, *J* = 7.2 Hz, 2H), 2.80 (td, *J* = 7.2, 1.2 Hz, 2H); <sup>13</sup>CNMR (100 MHz, CDCl<sub>3</sub>): 202.7, 136.3, 127.0, 122.1, 121.5, 119.3, 118.5, 114.5, 111.2, 43.9, 17.8; MS (70 eV): *m/z* (%): 130.1 (100), 173.1(46).

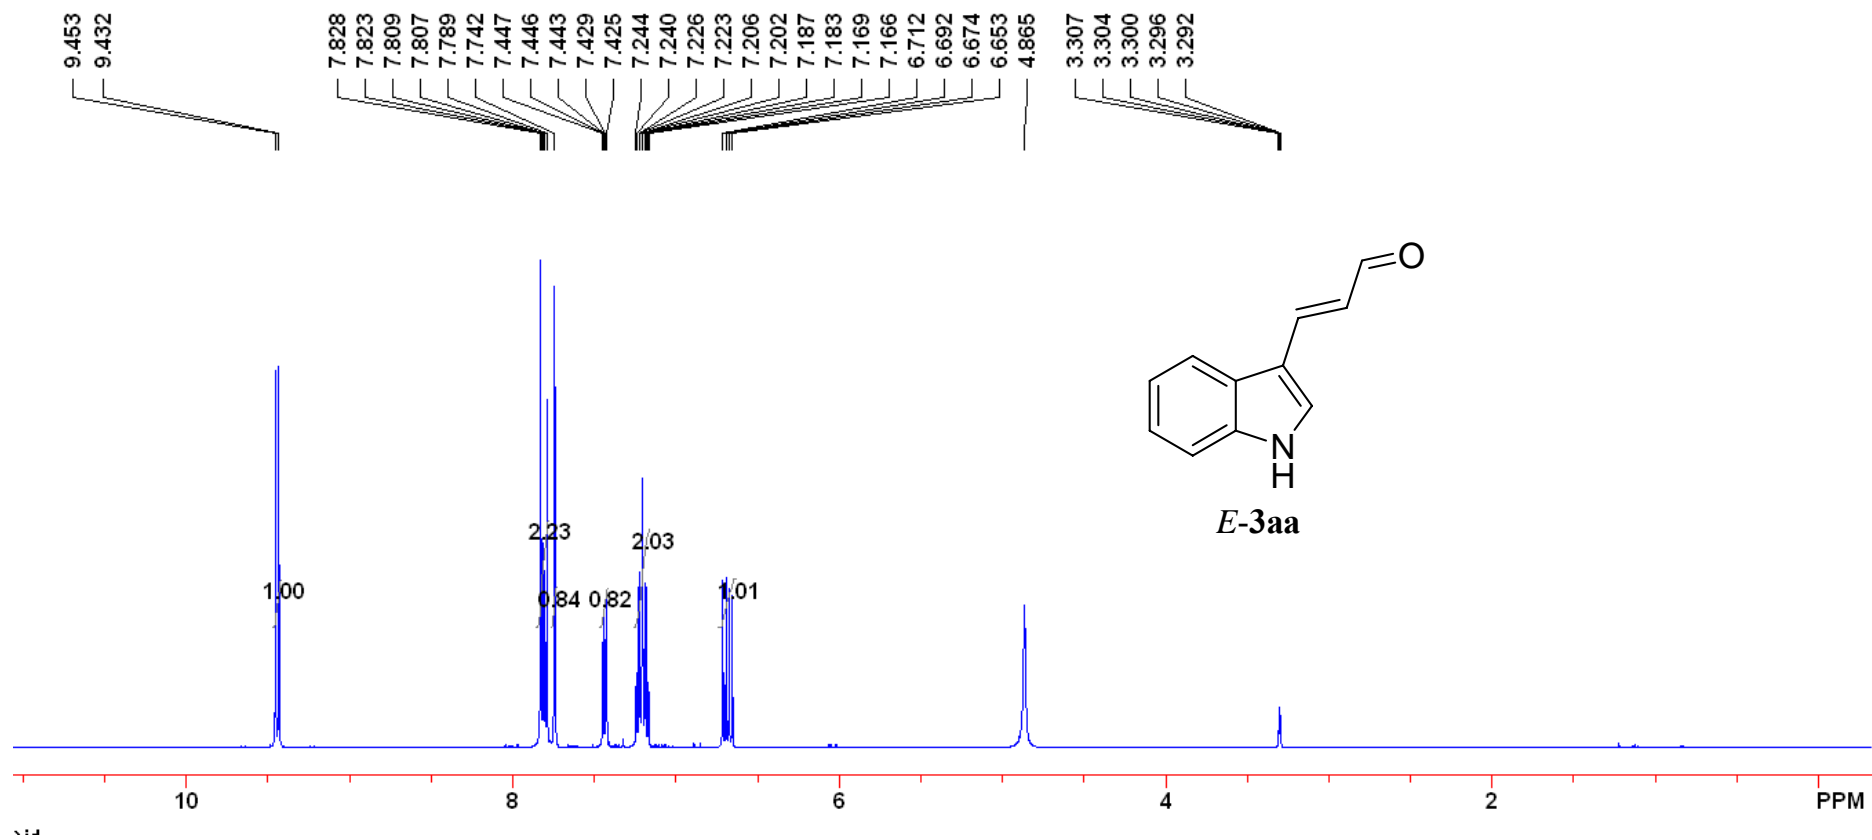

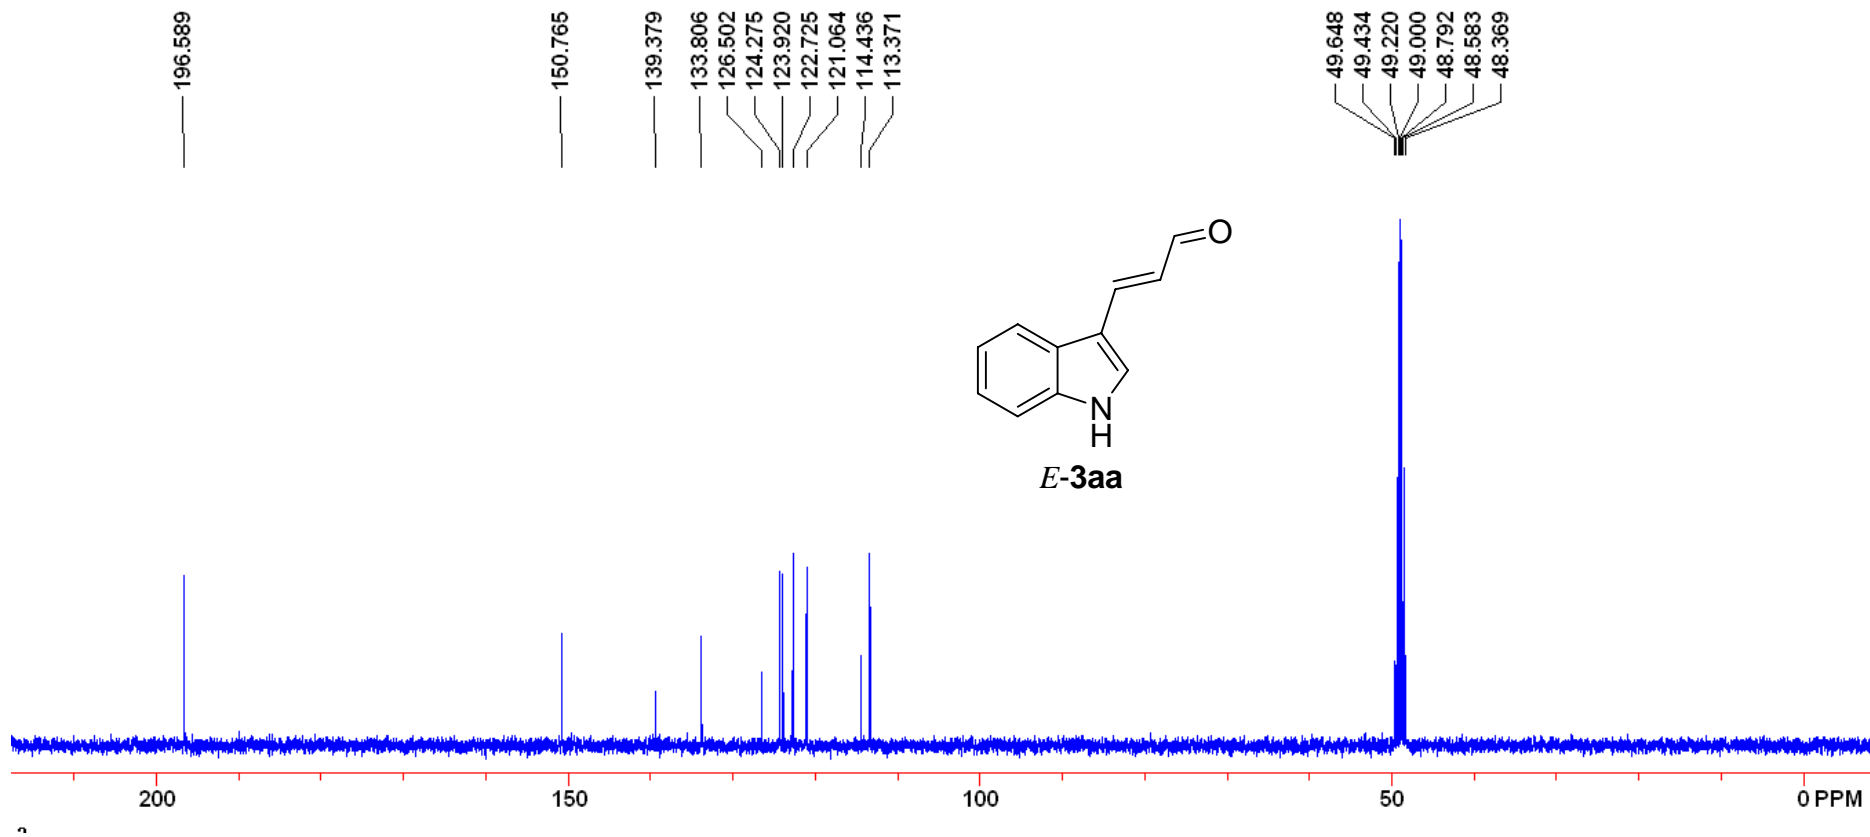

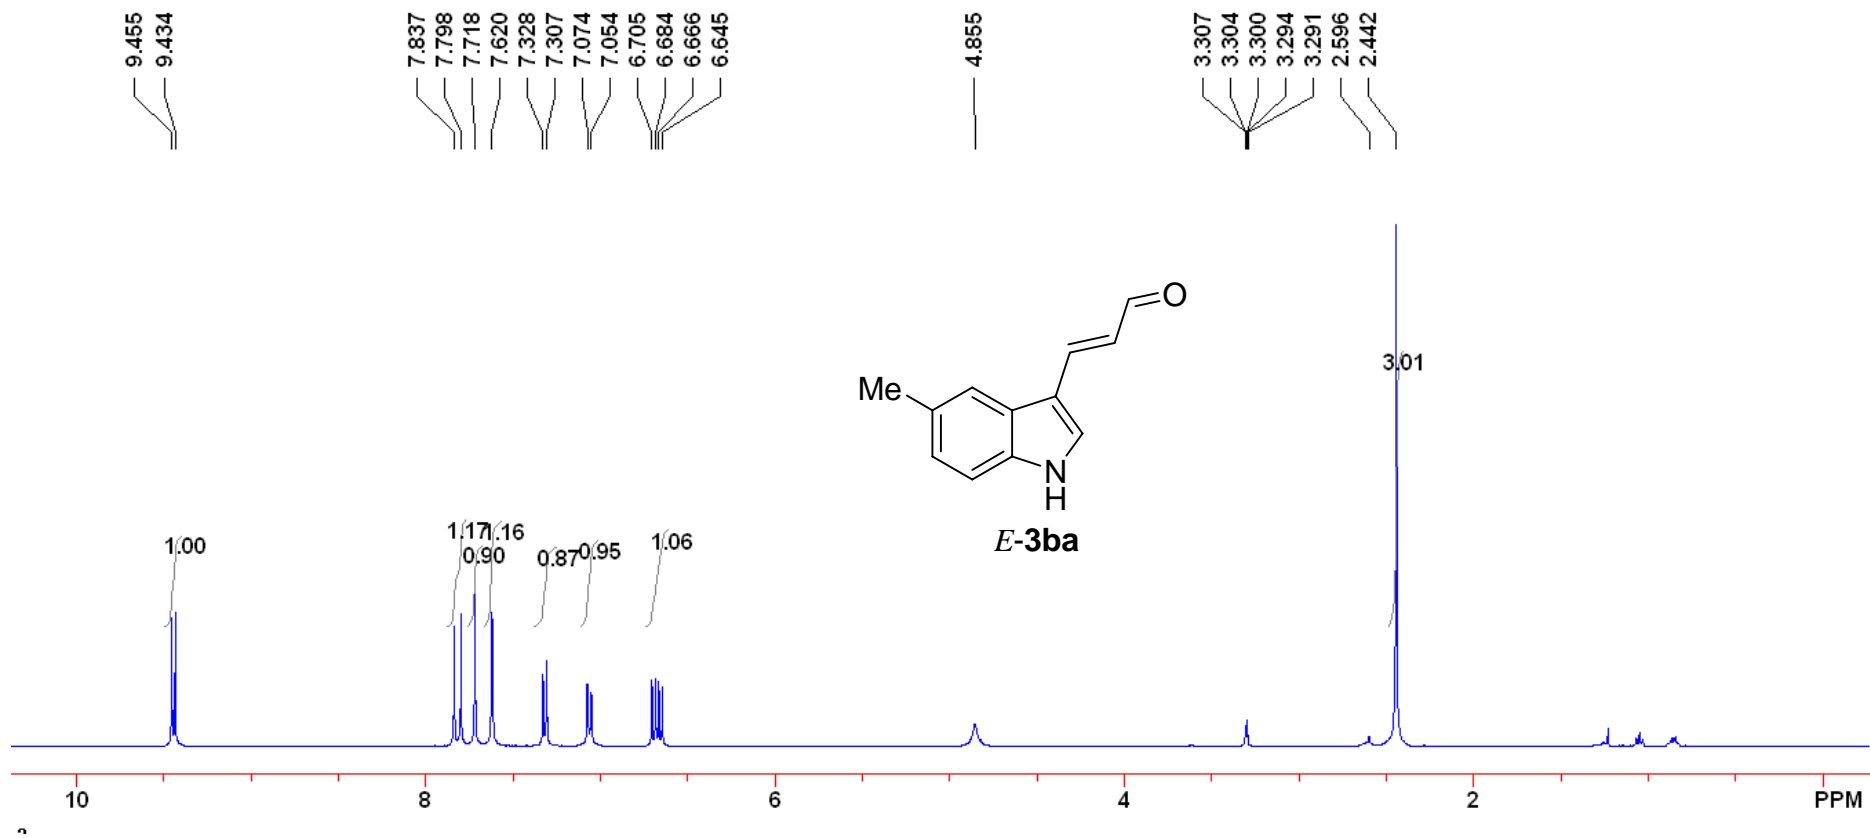

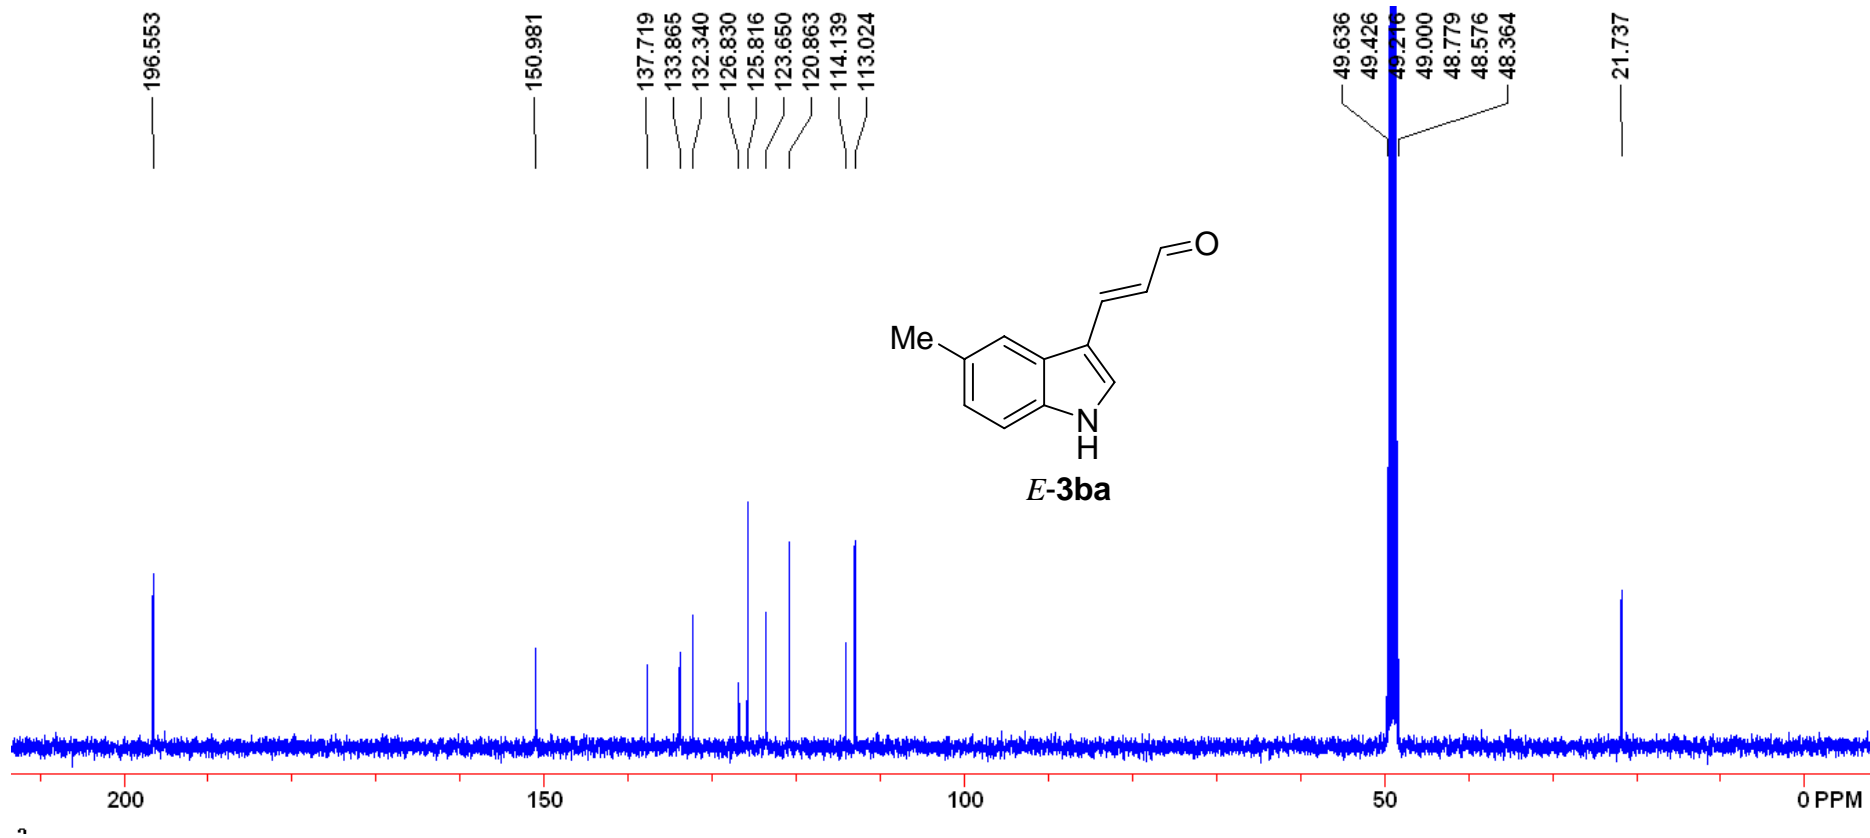

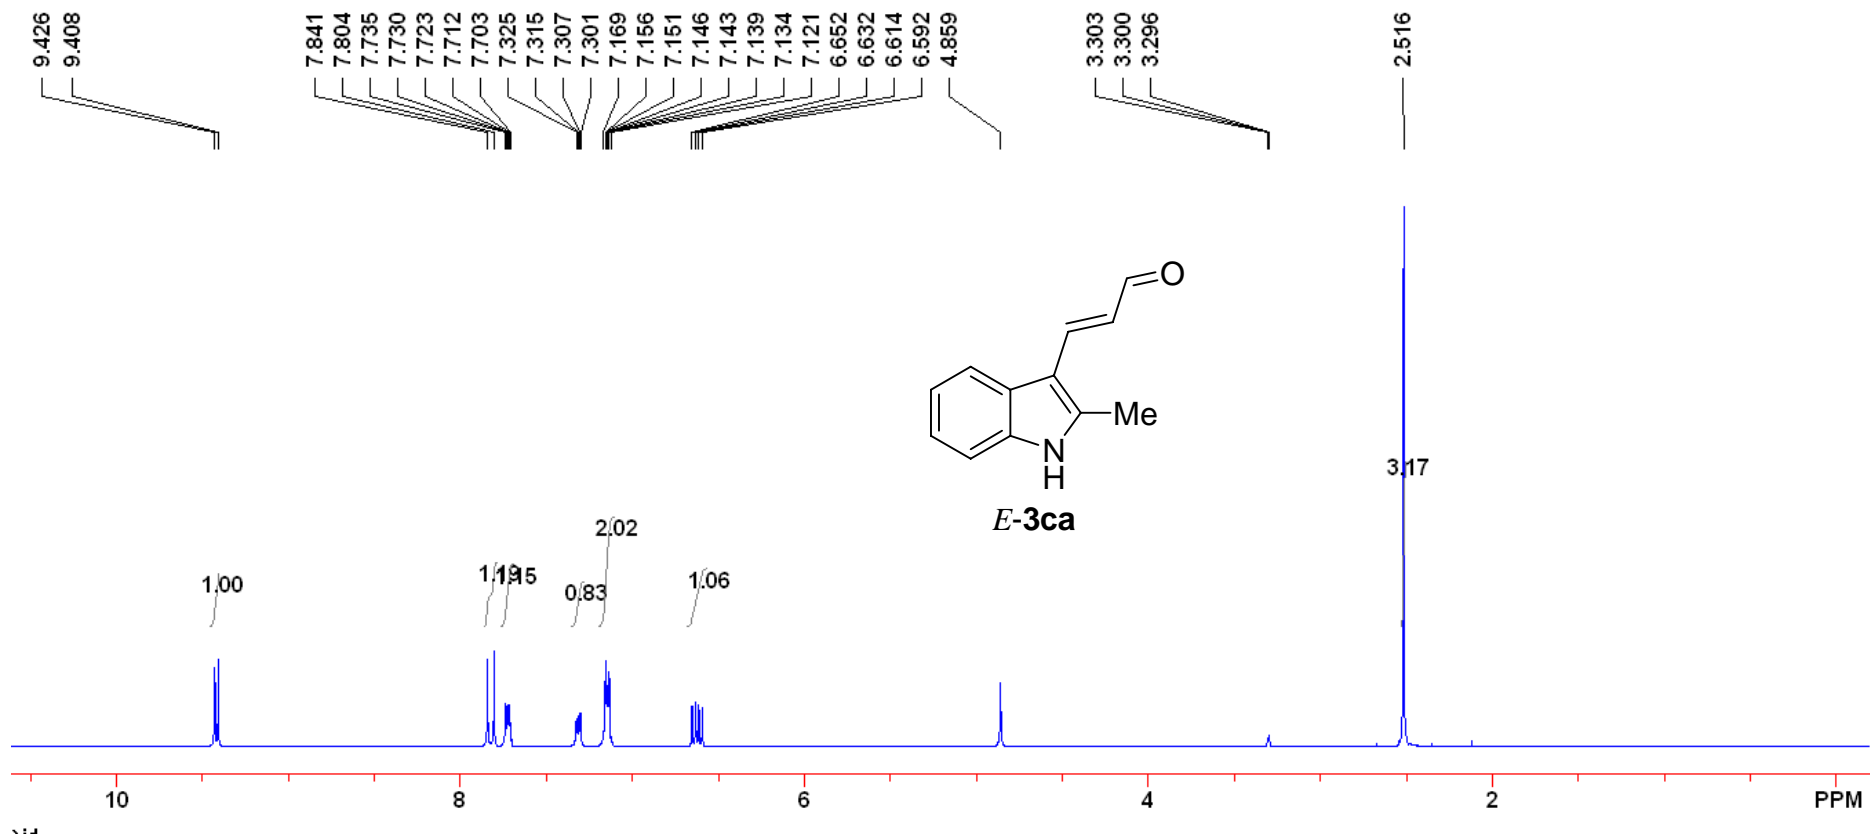

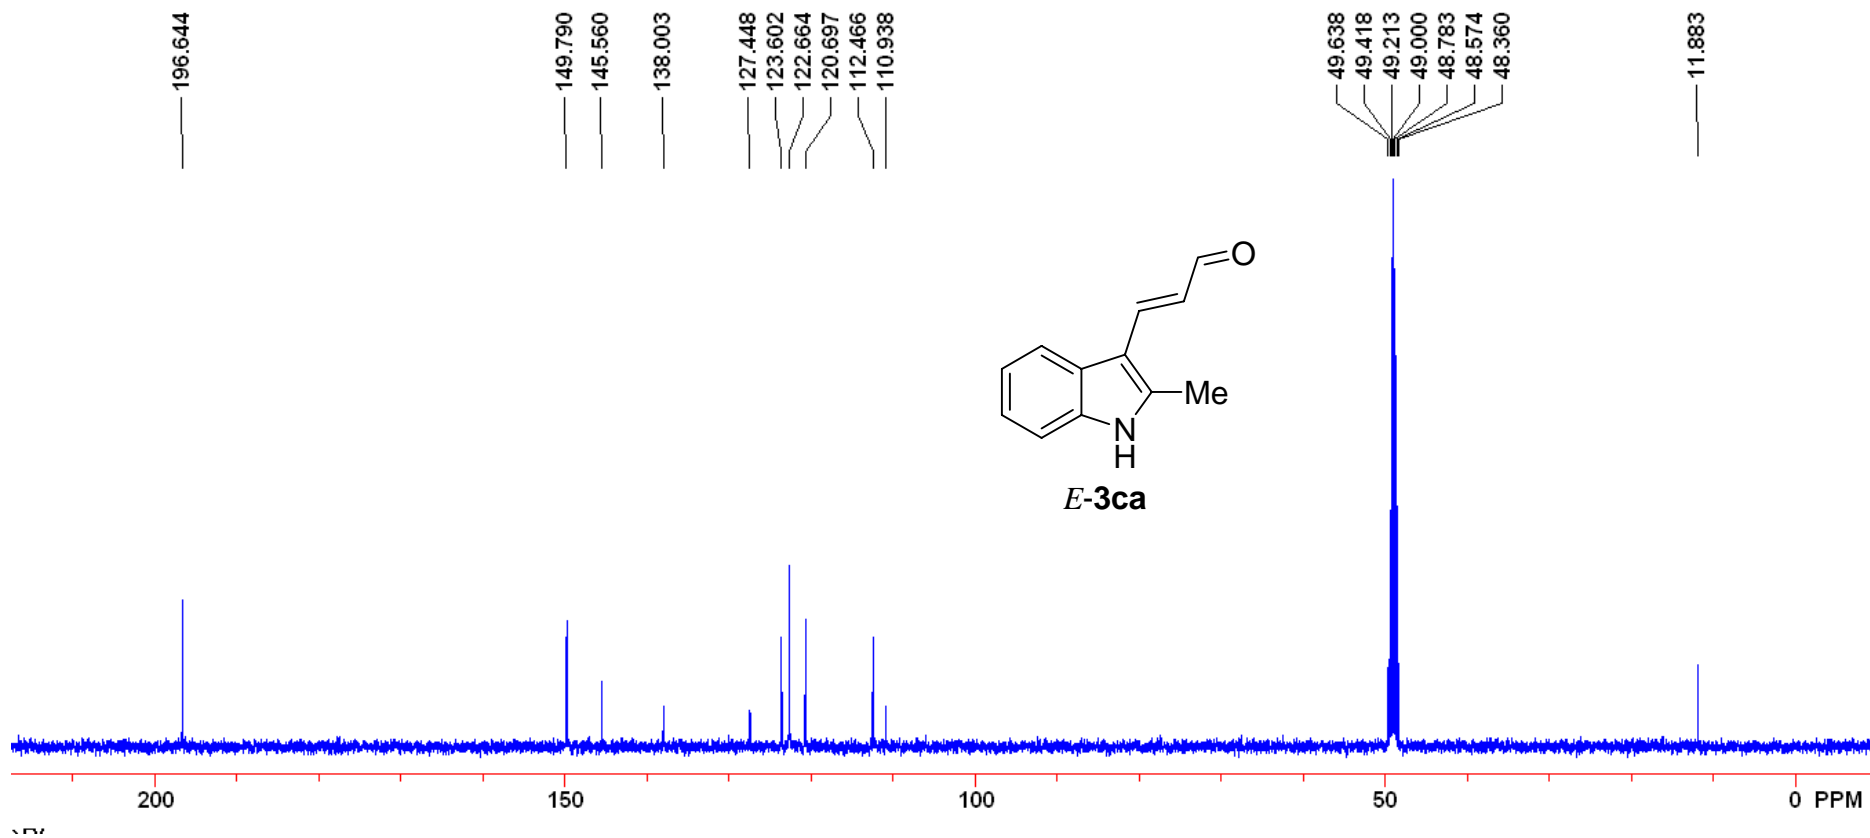



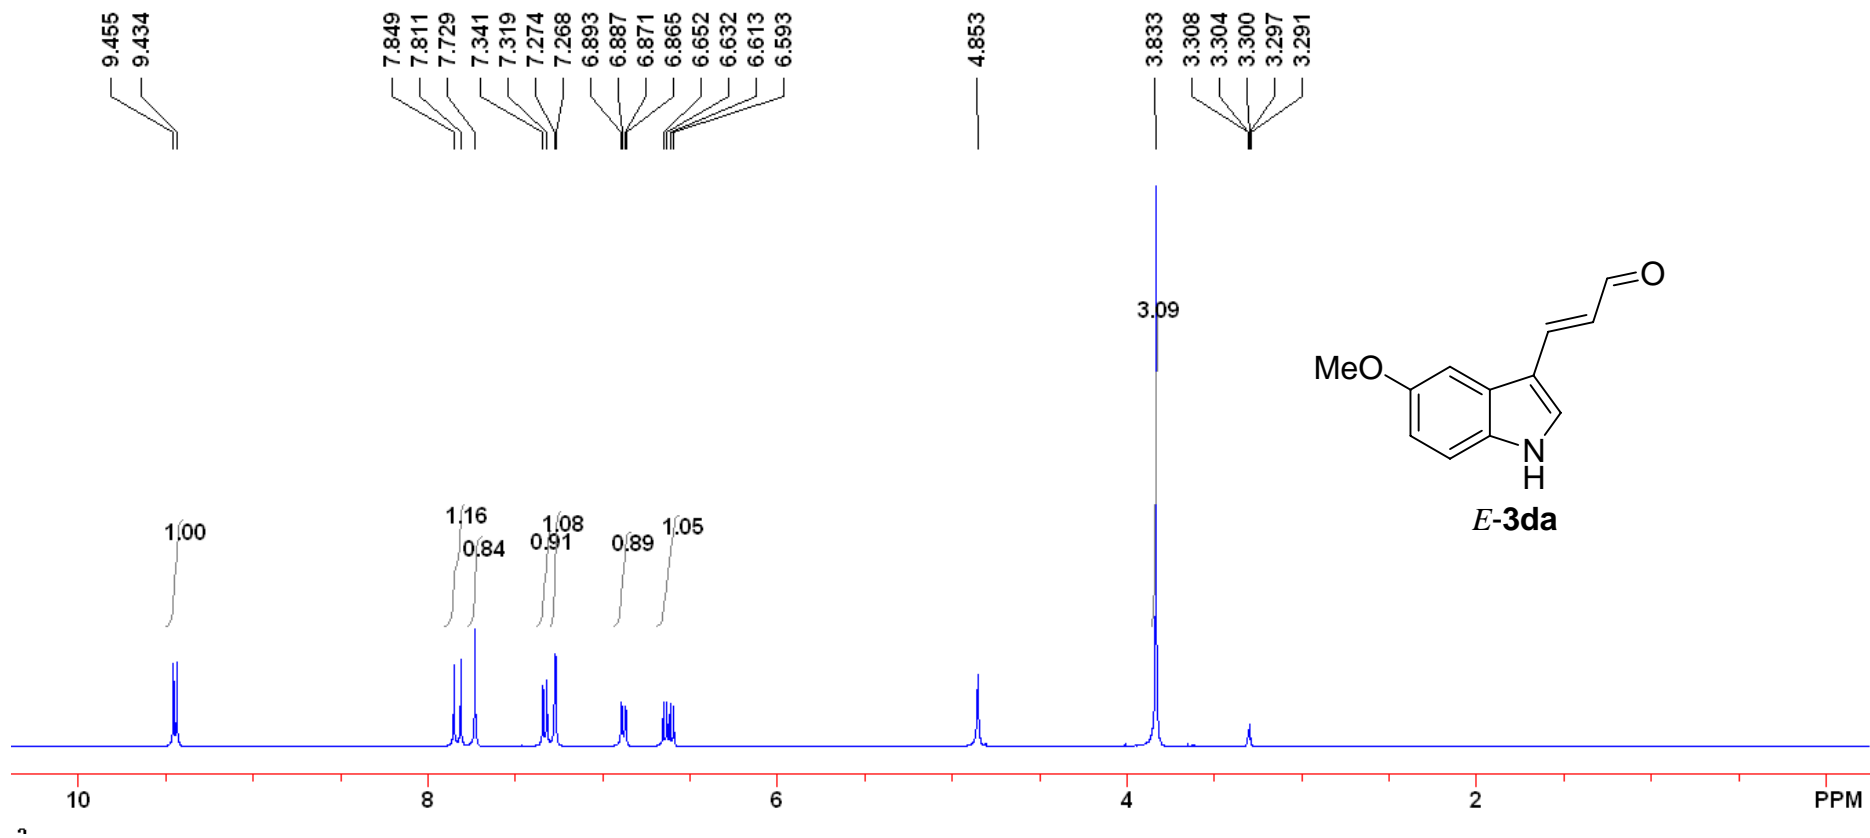

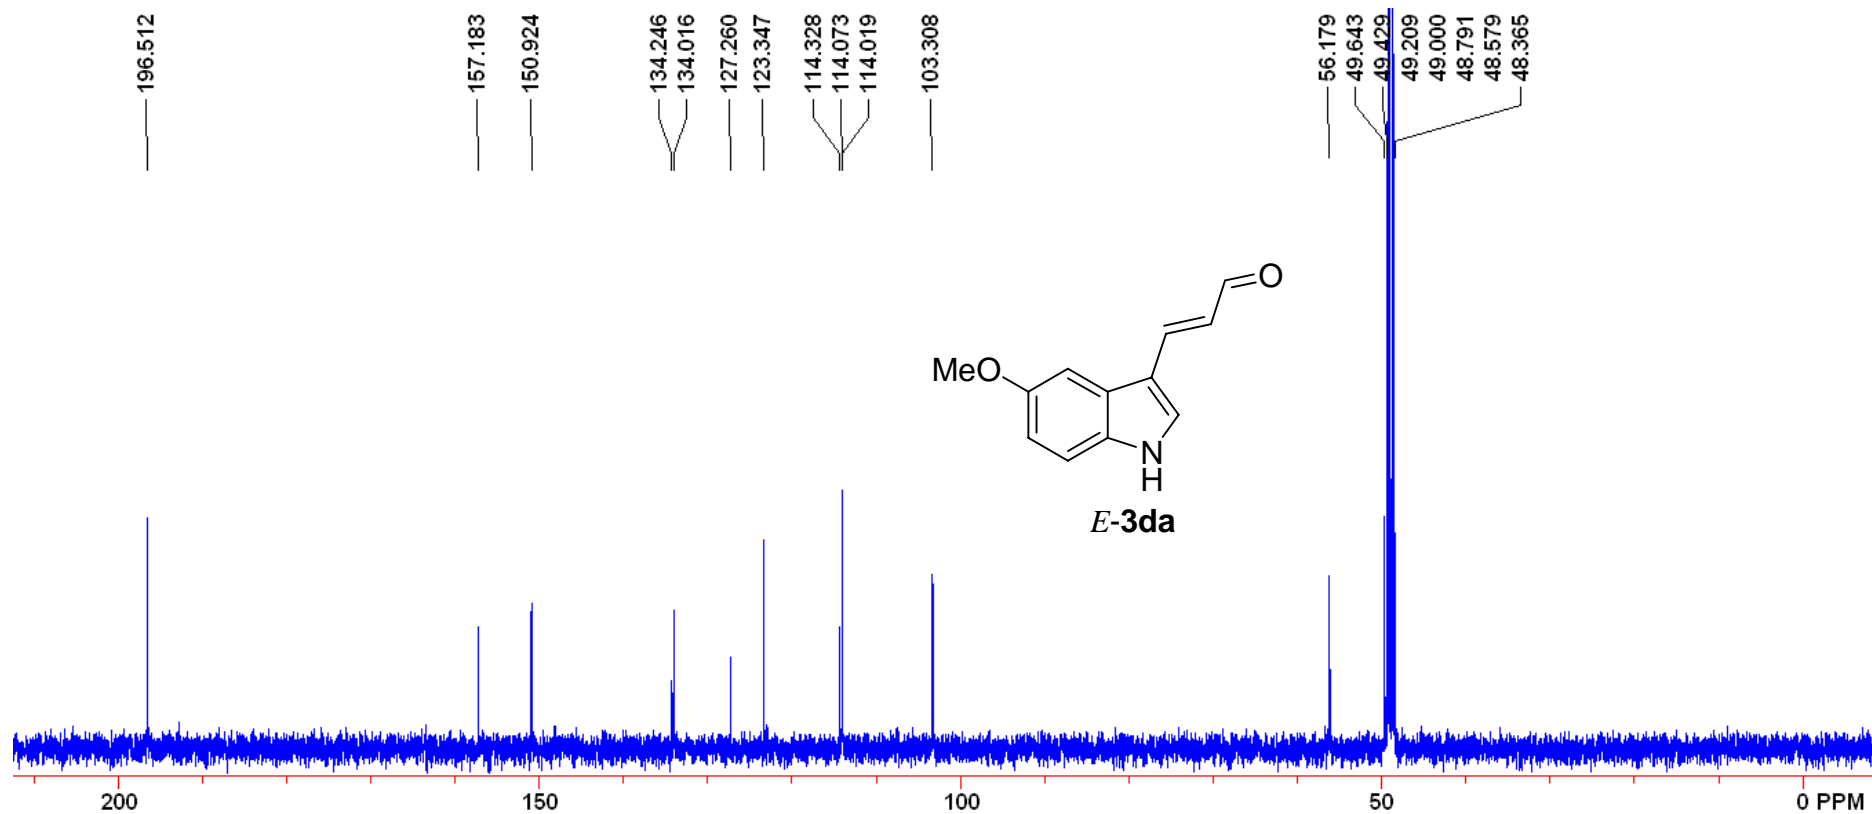

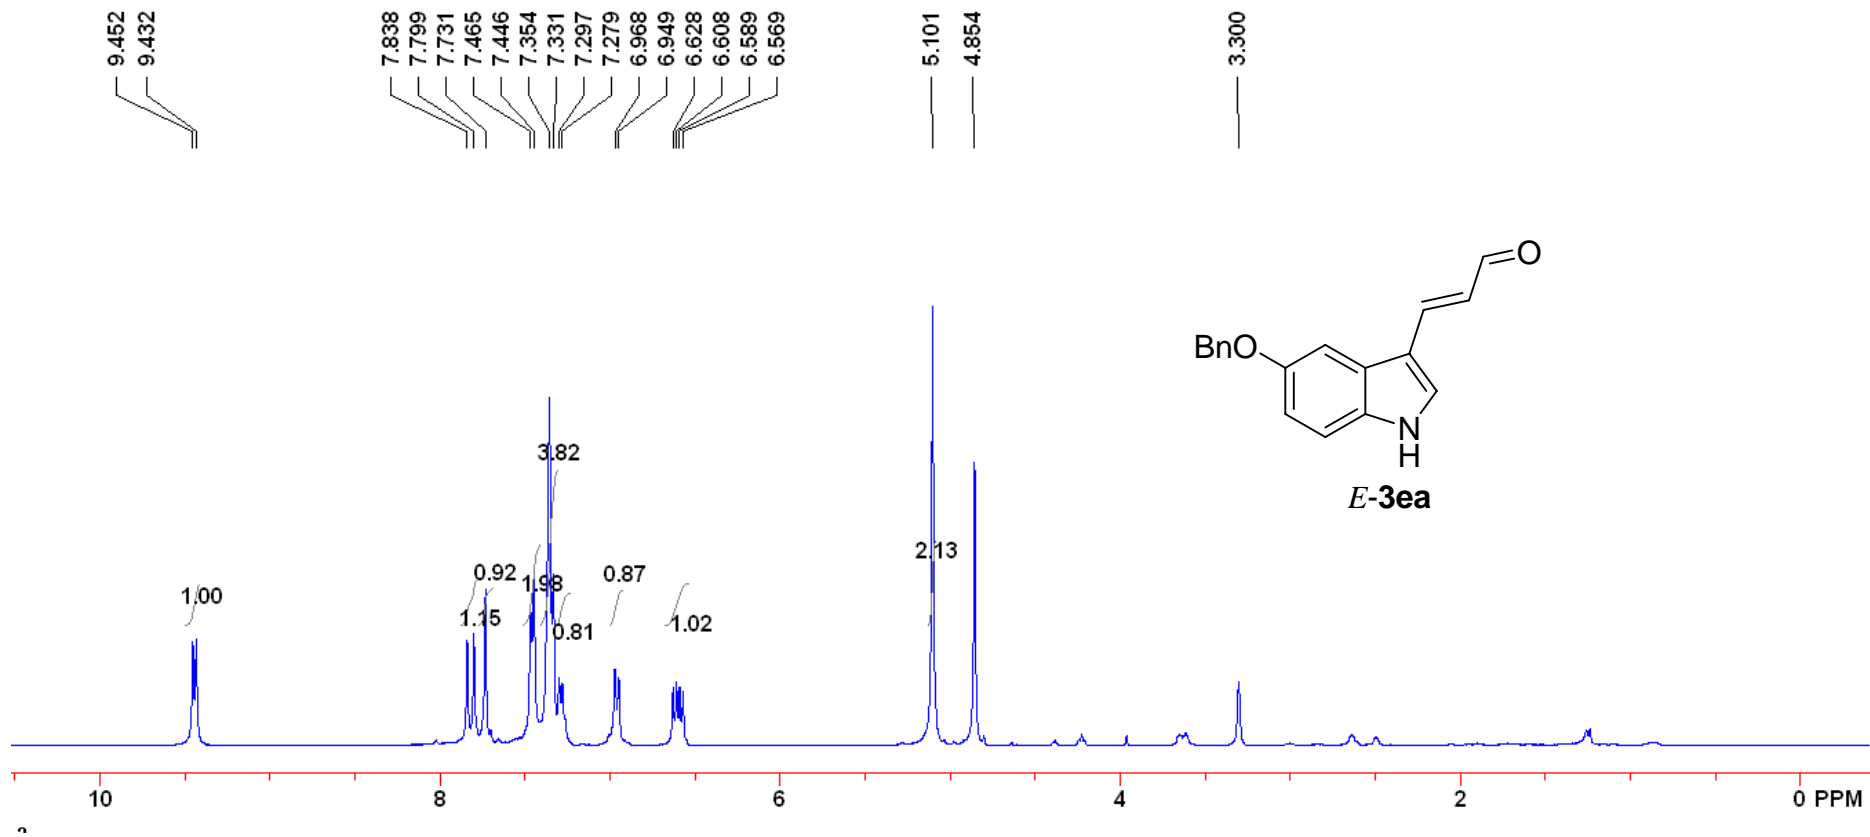

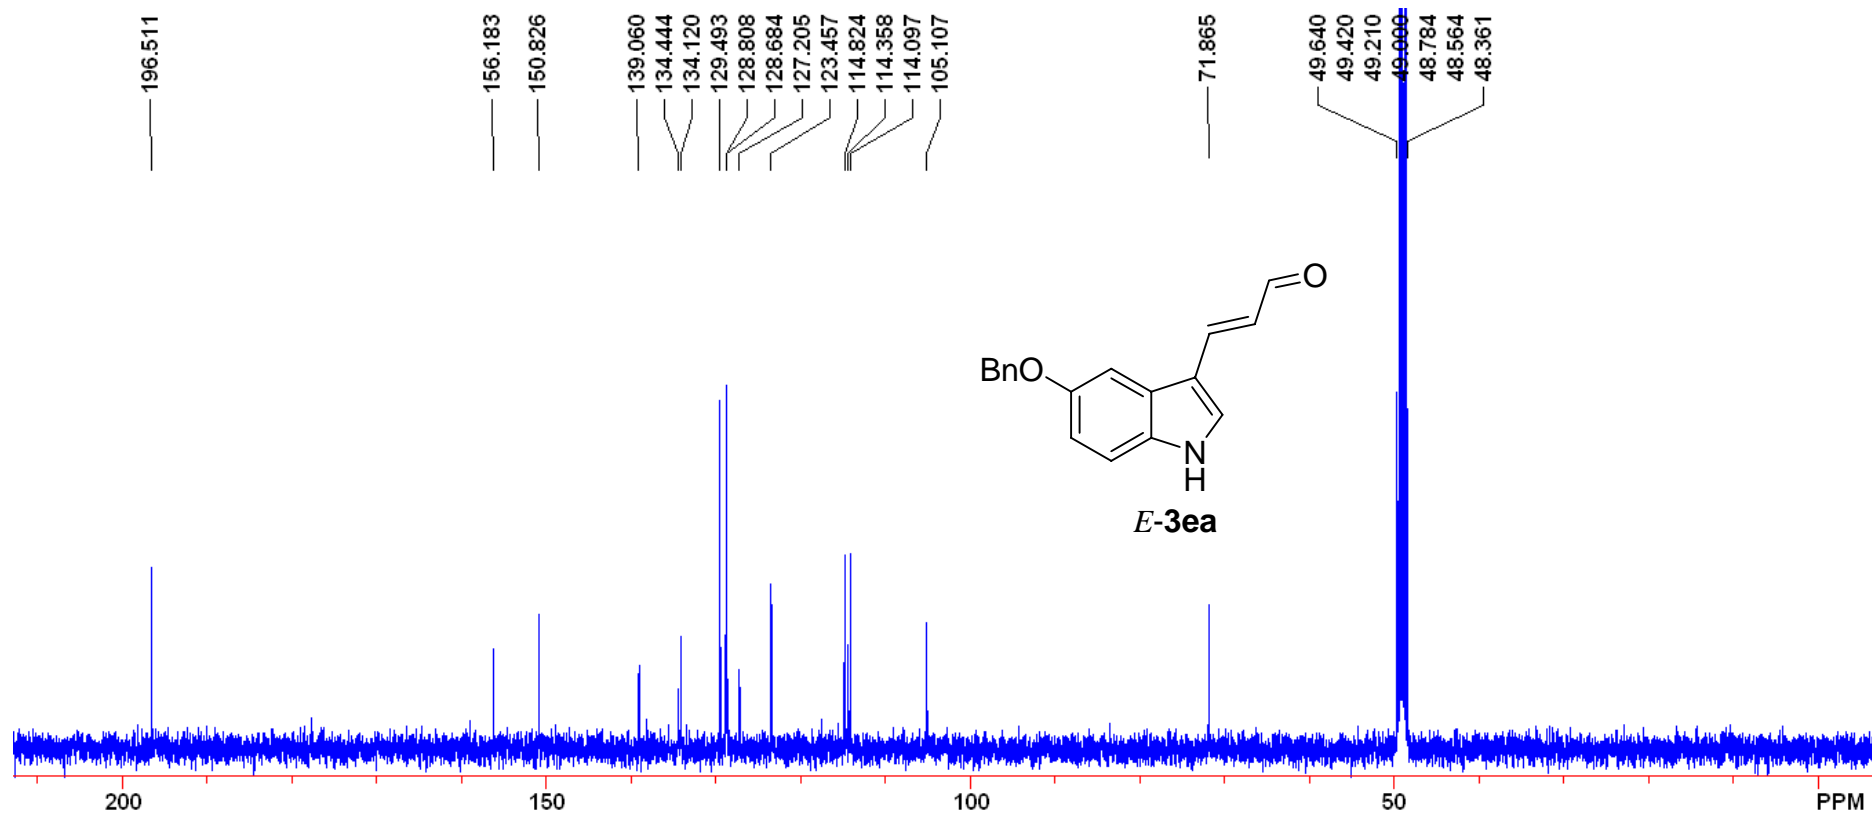

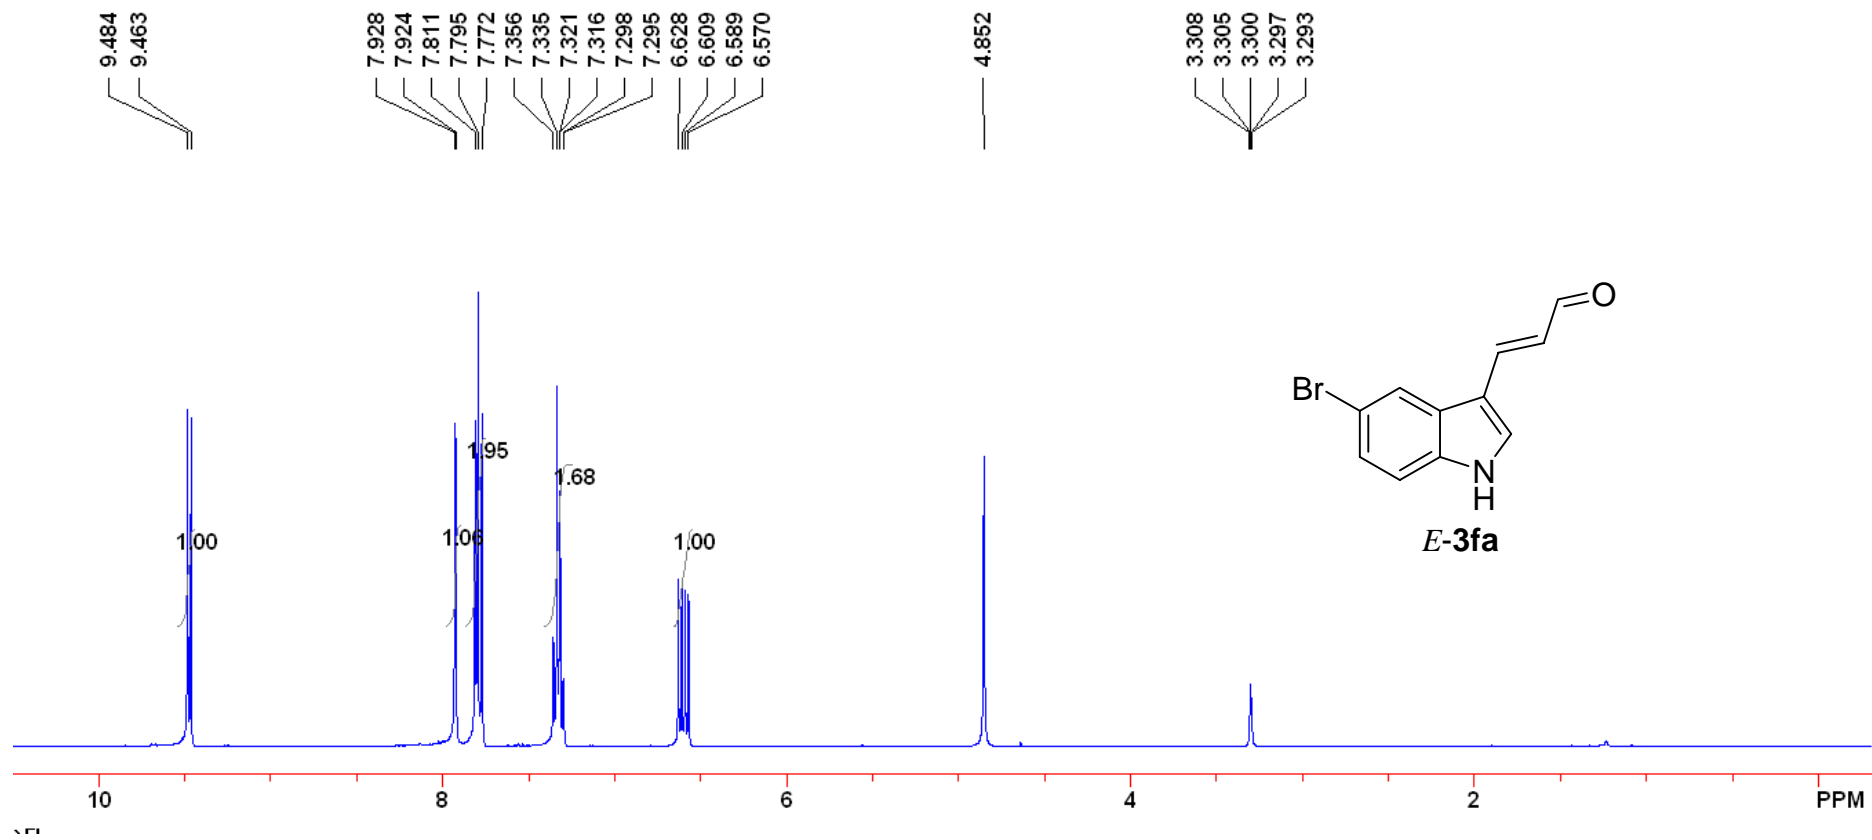

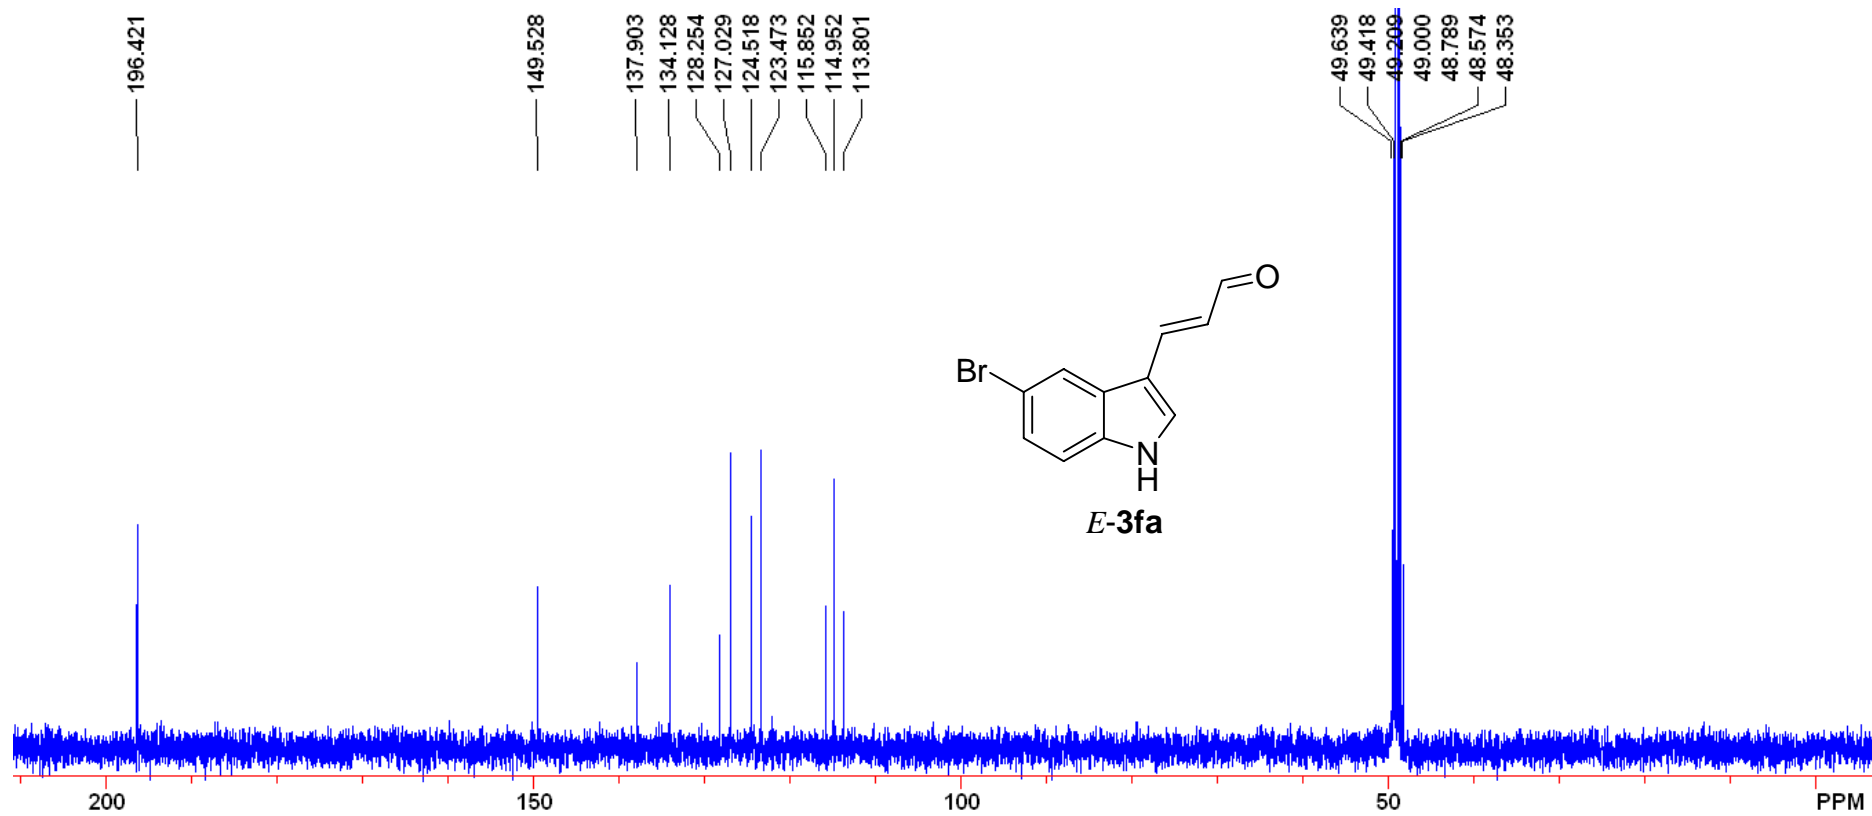

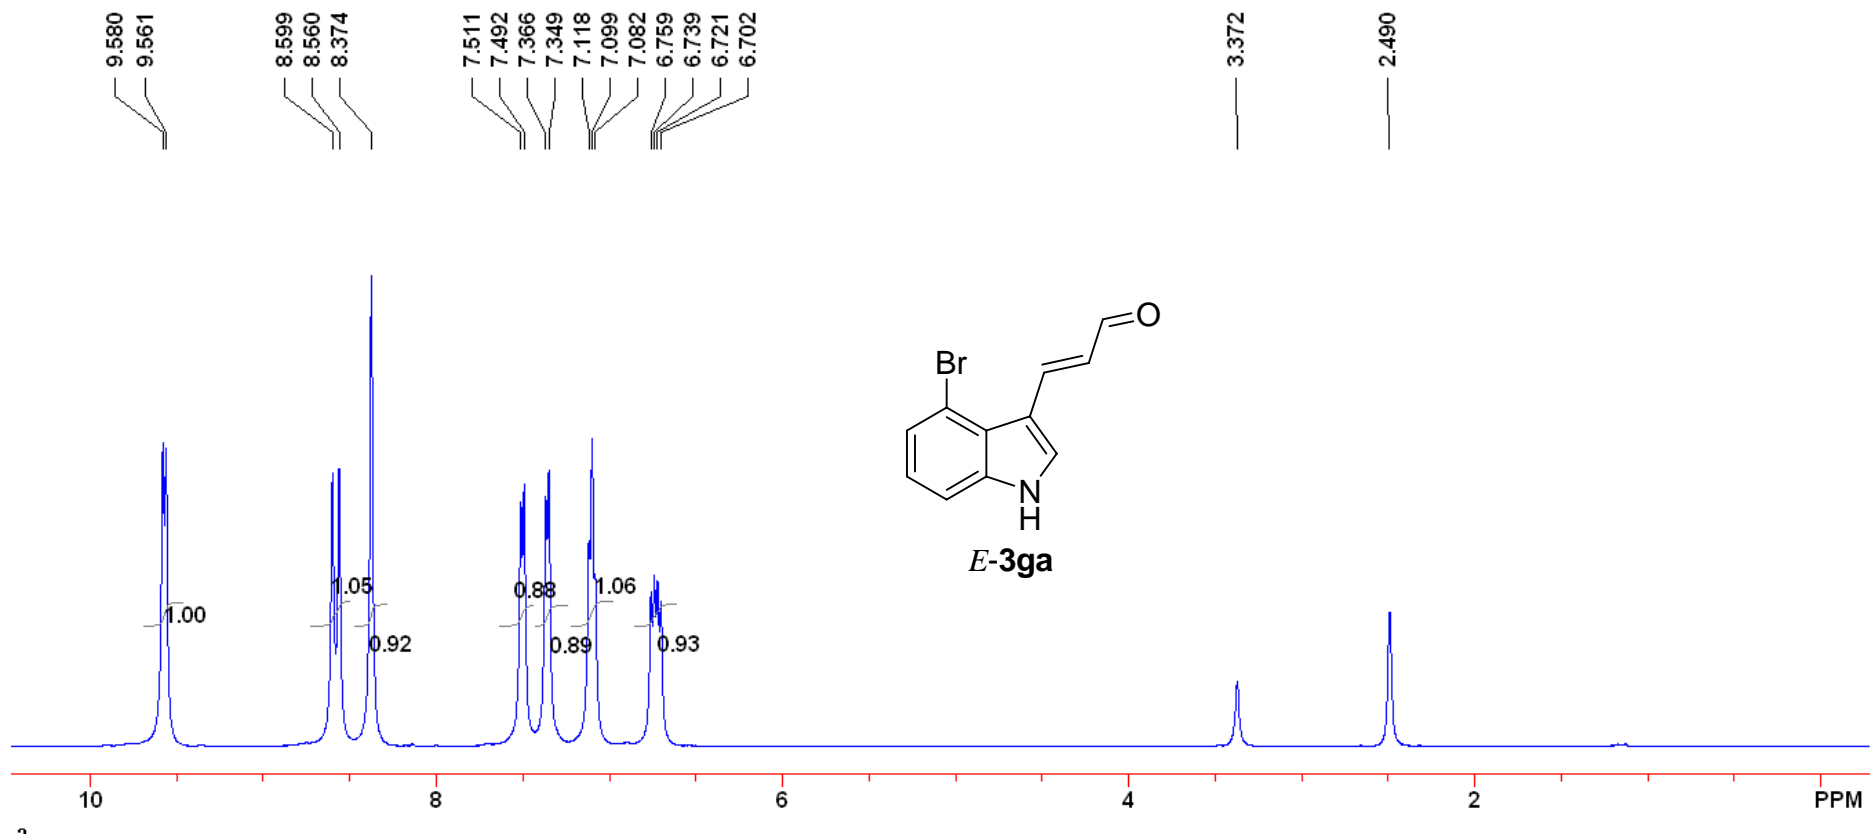

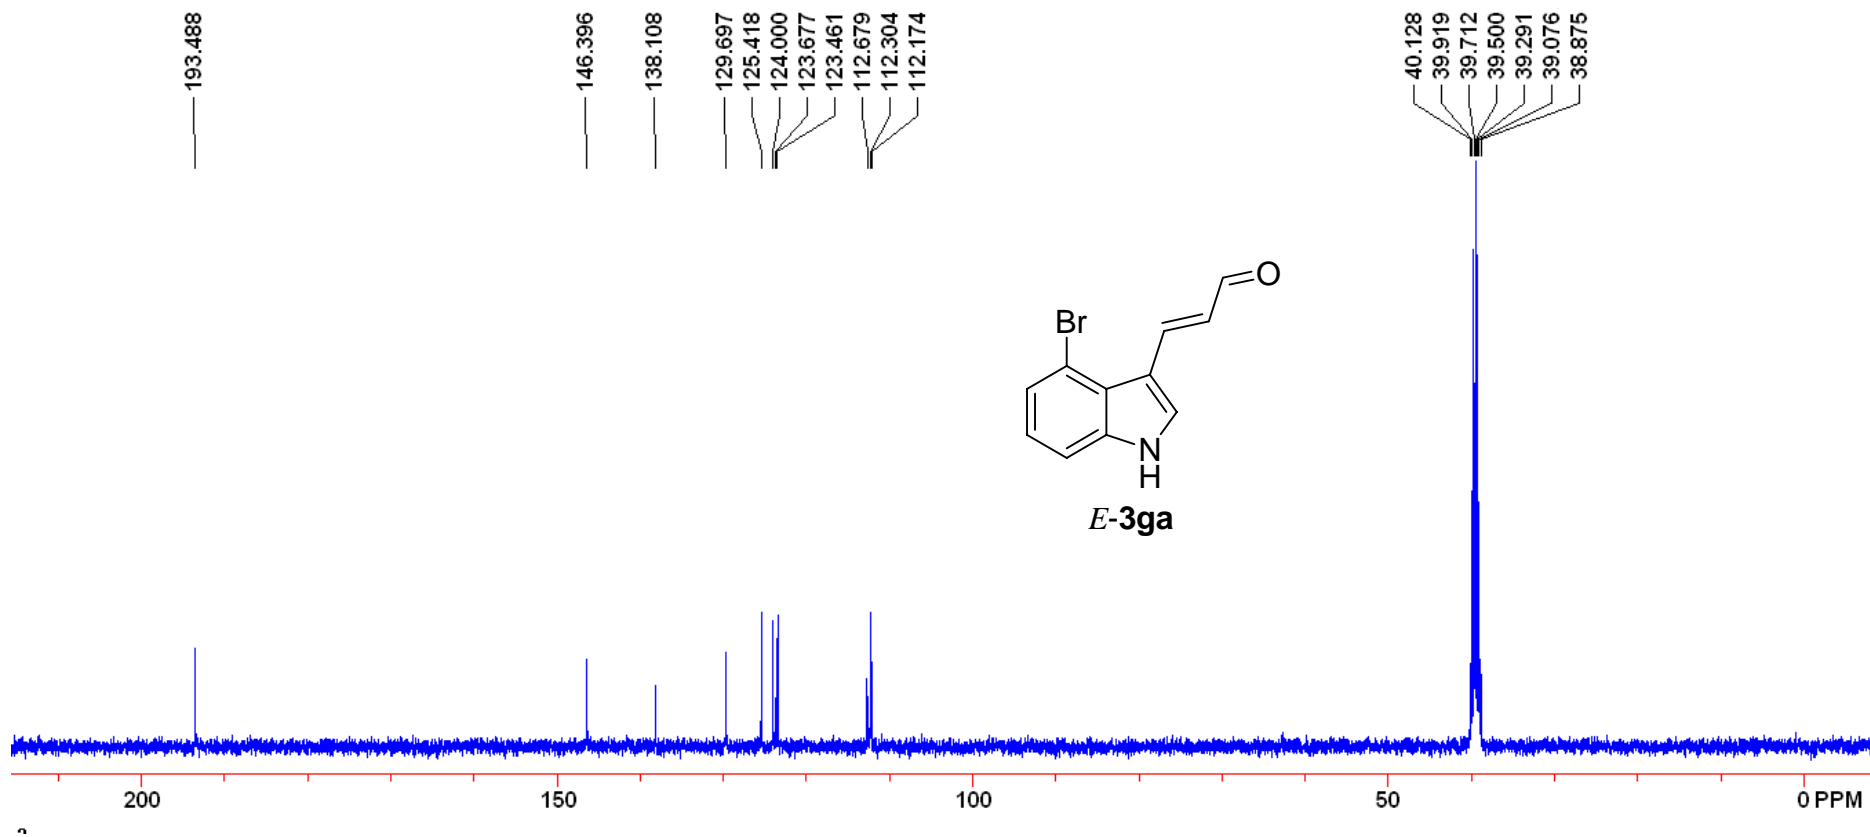



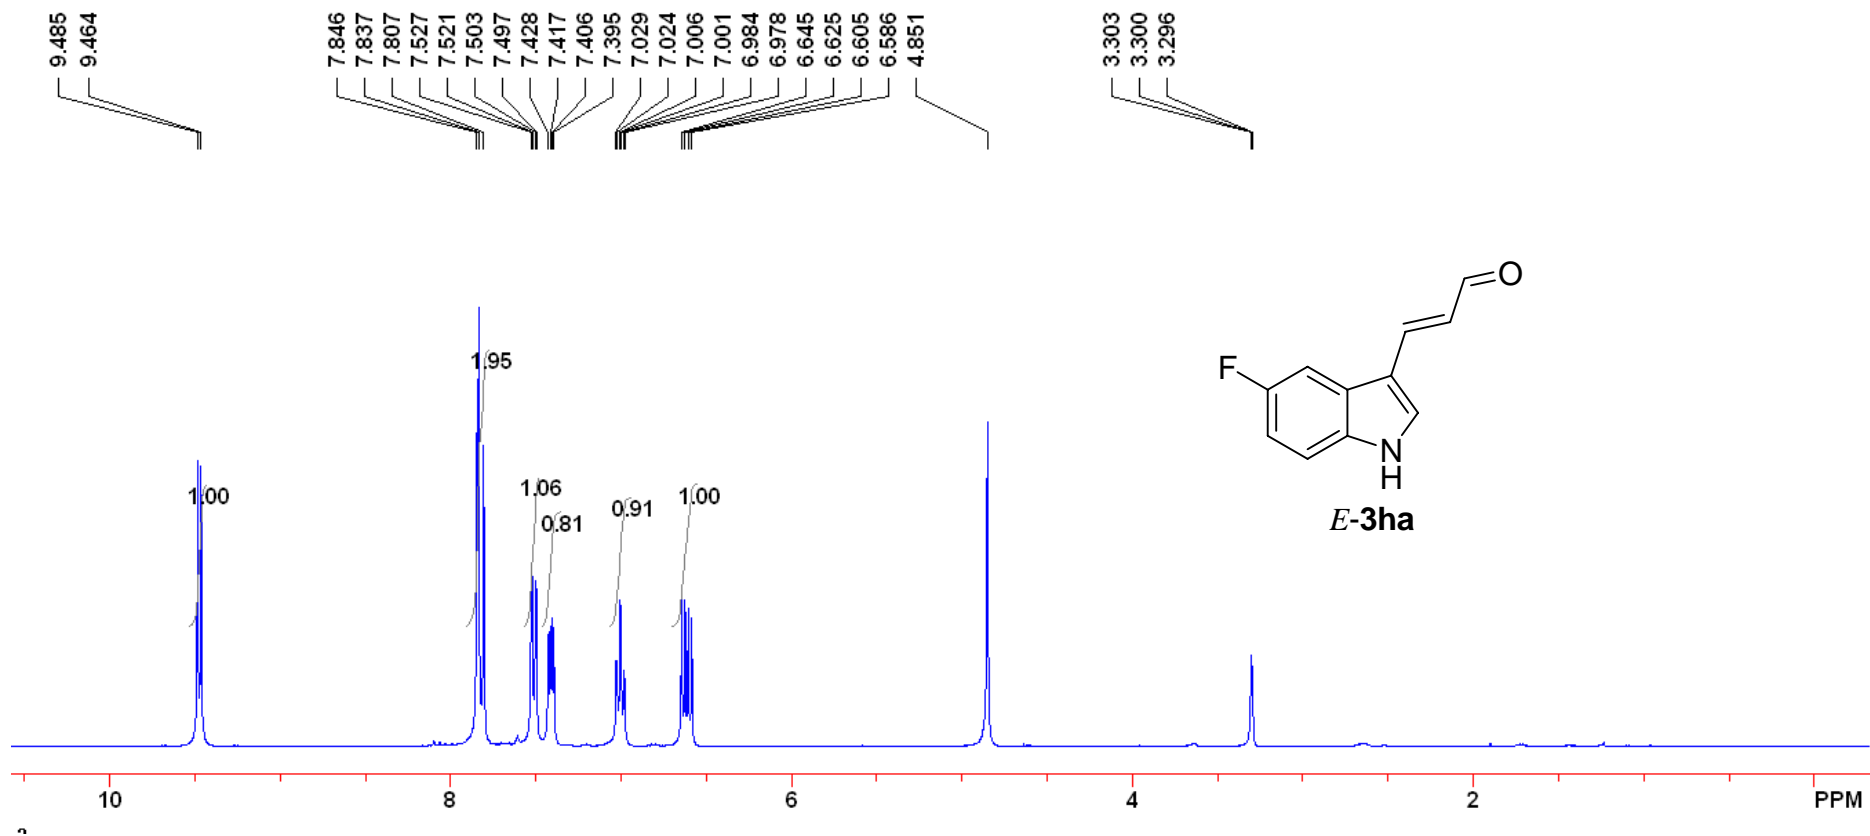

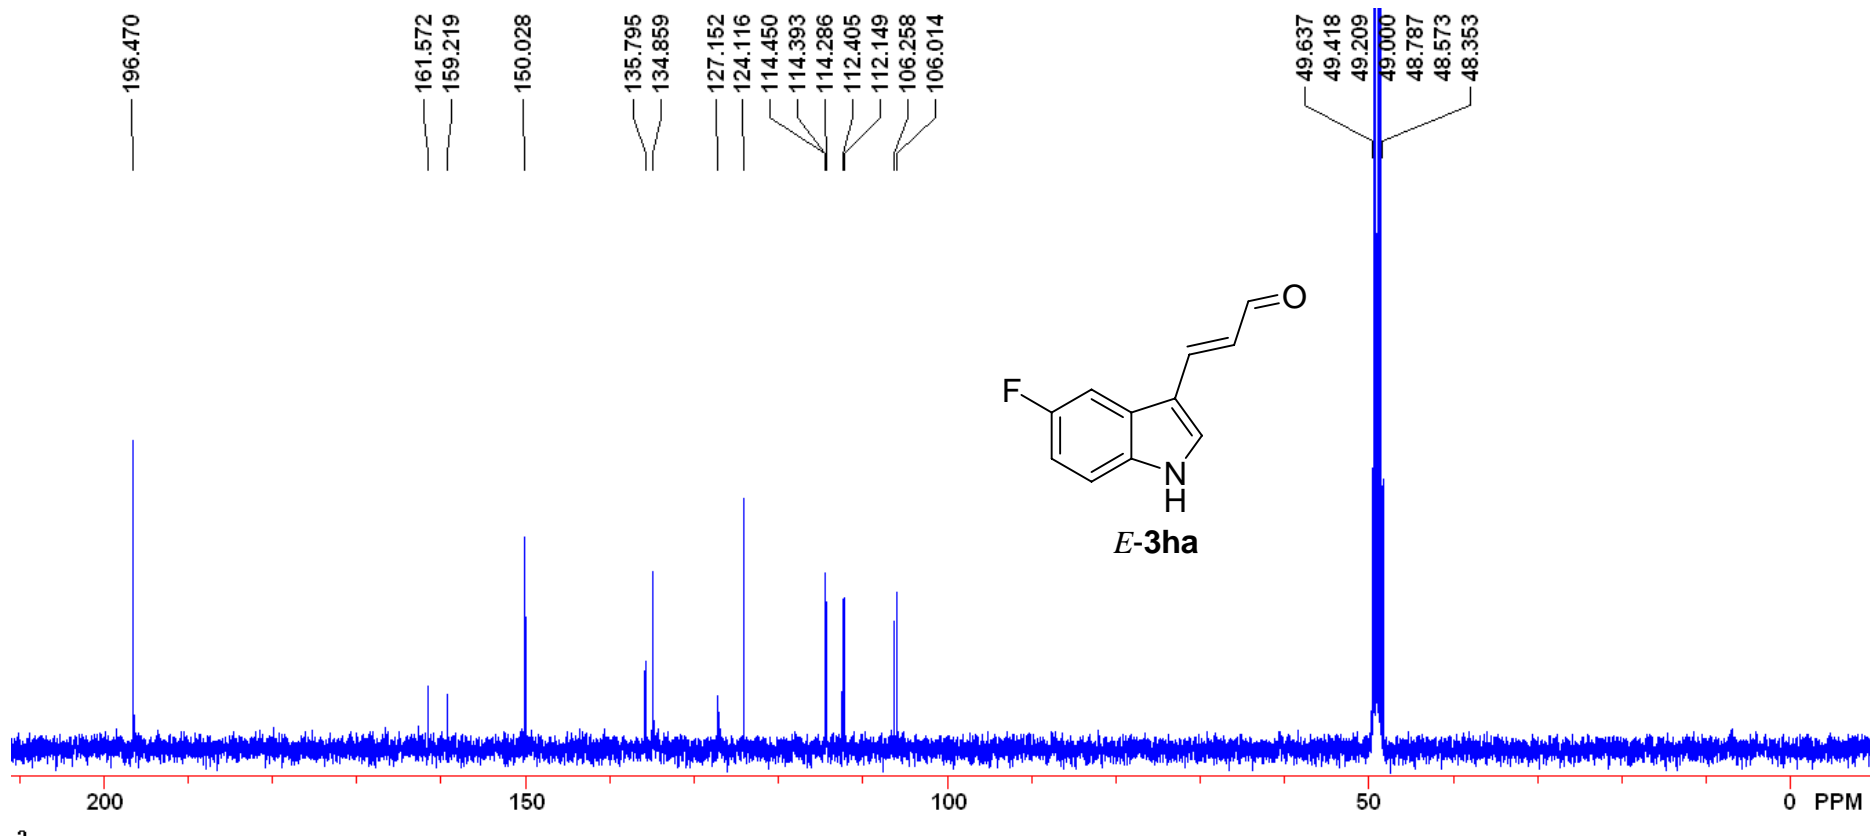



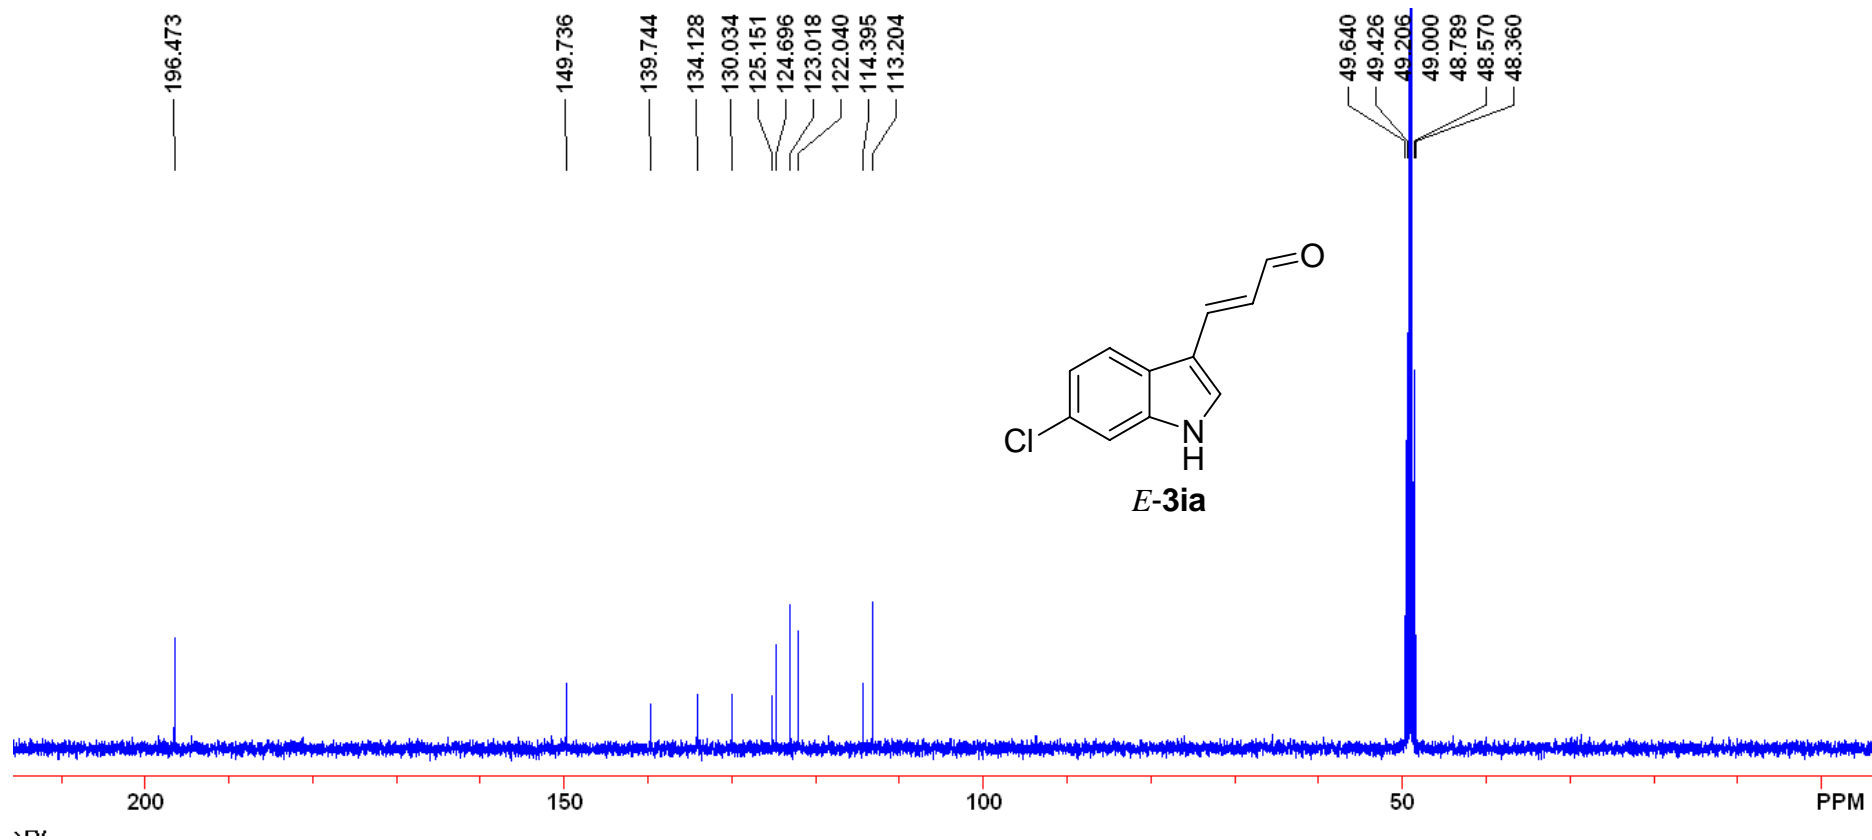

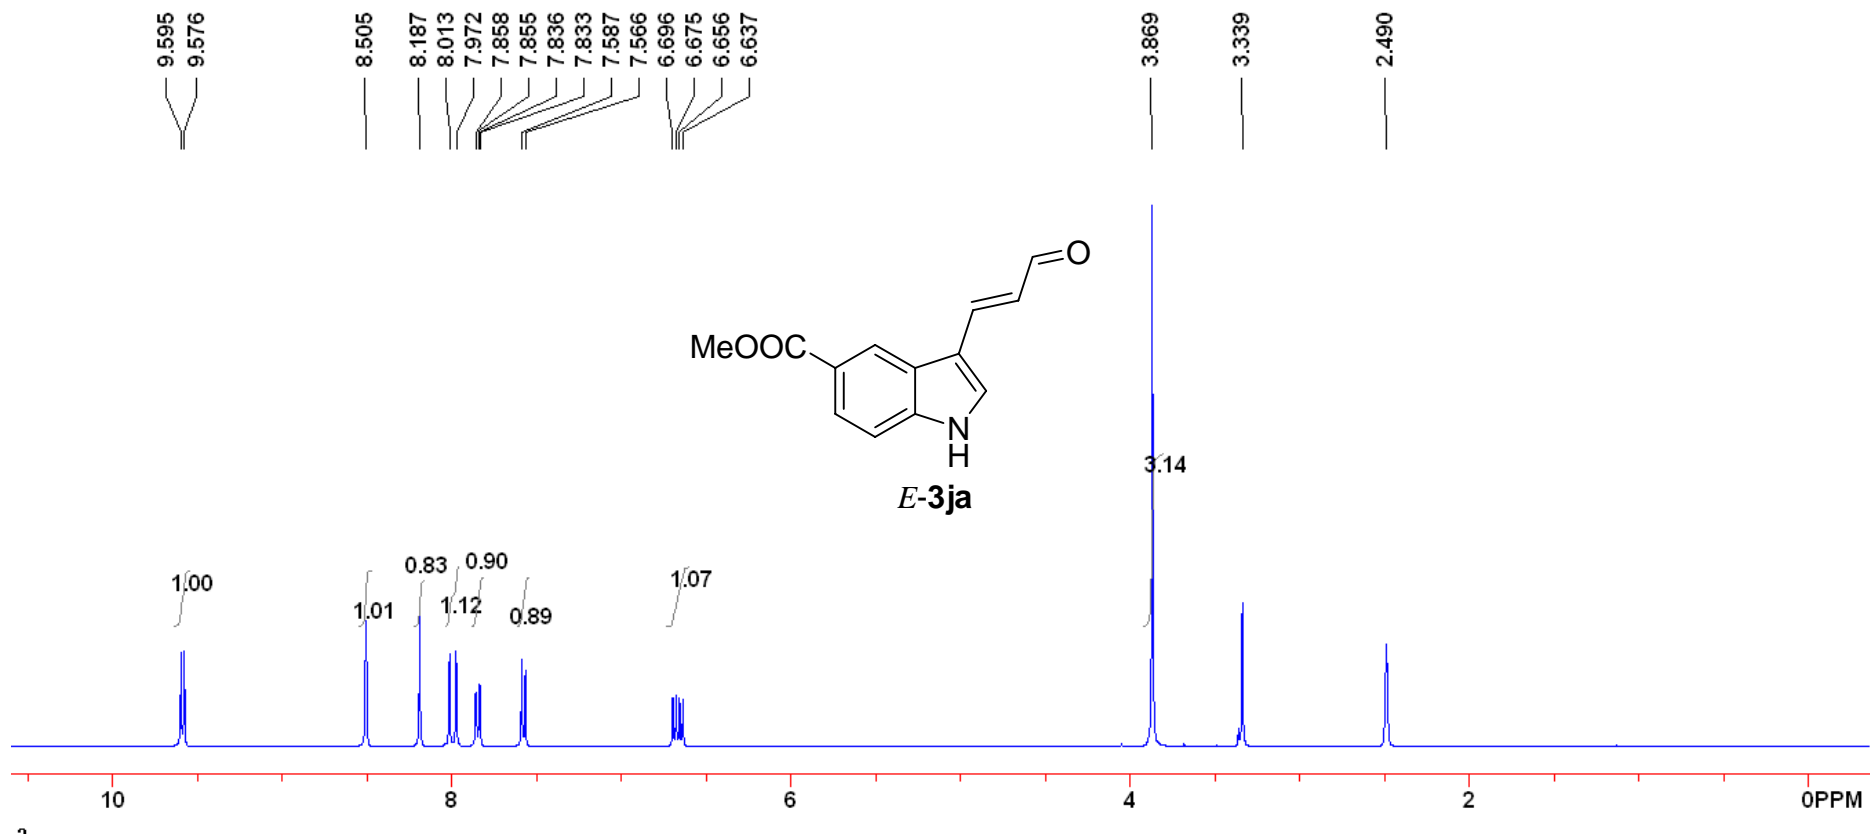

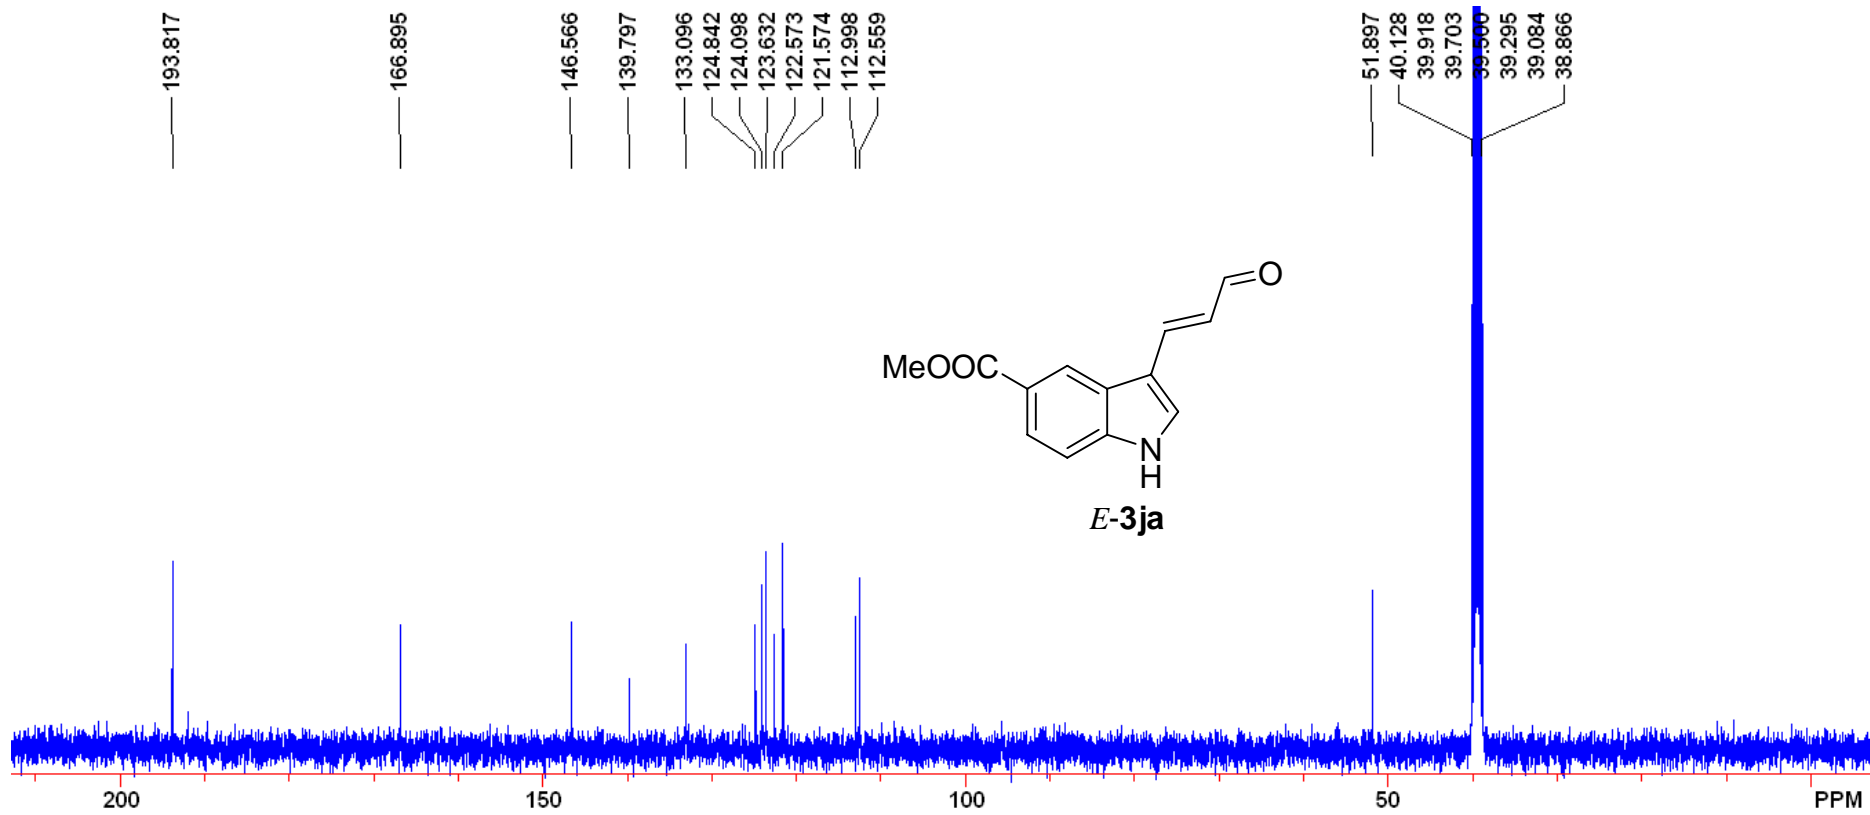

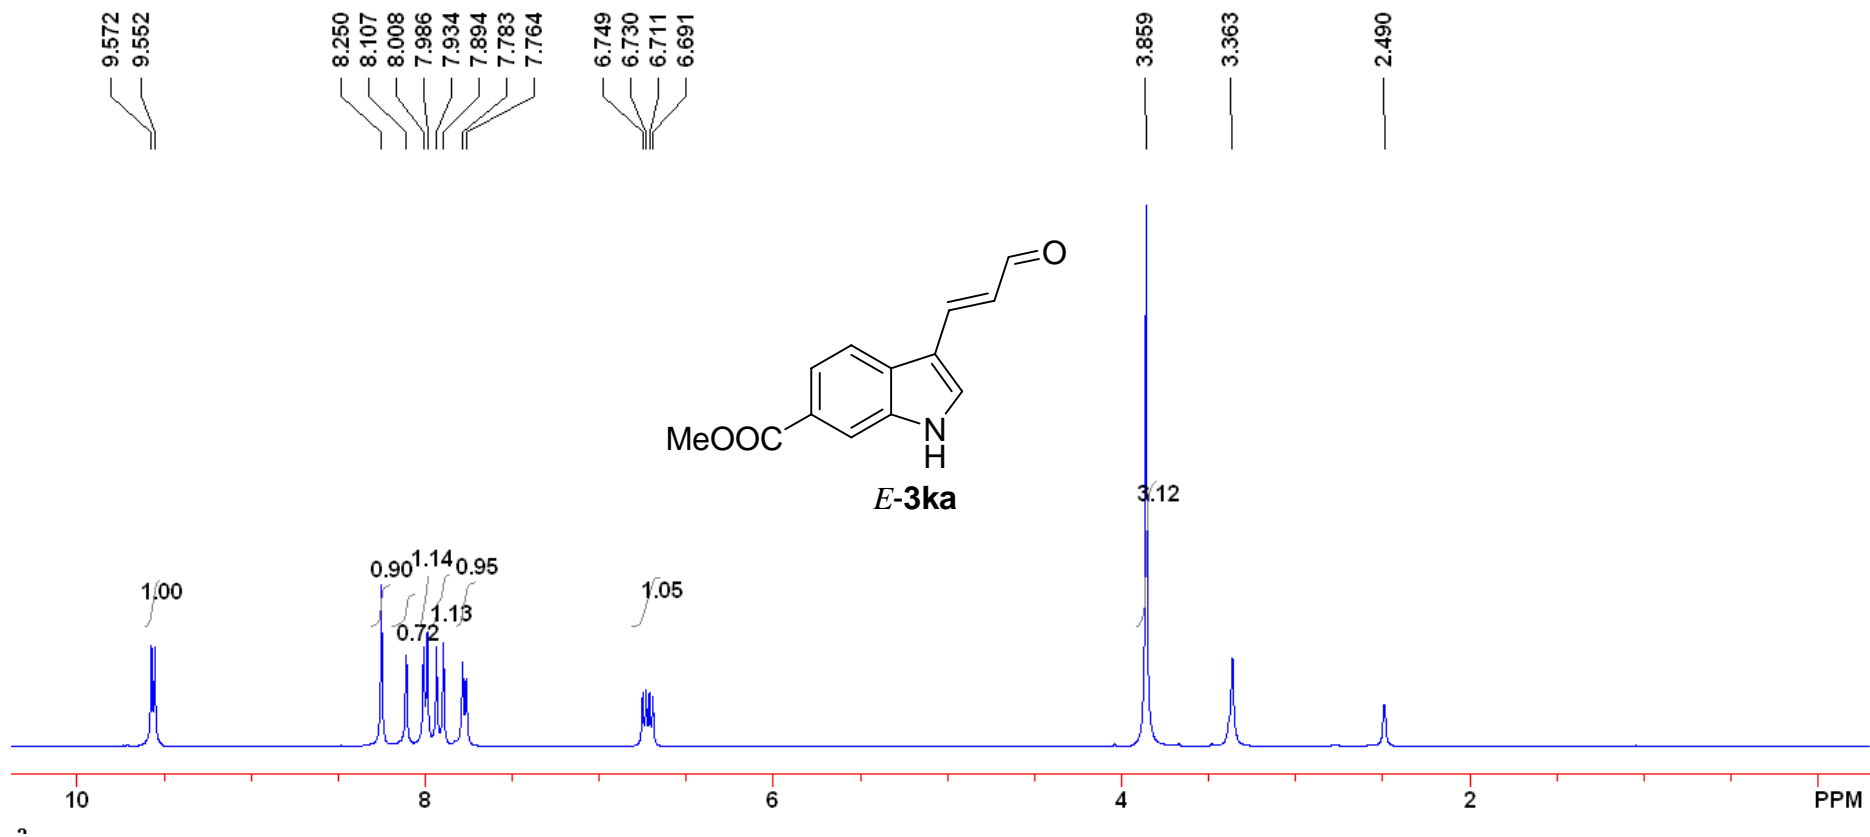

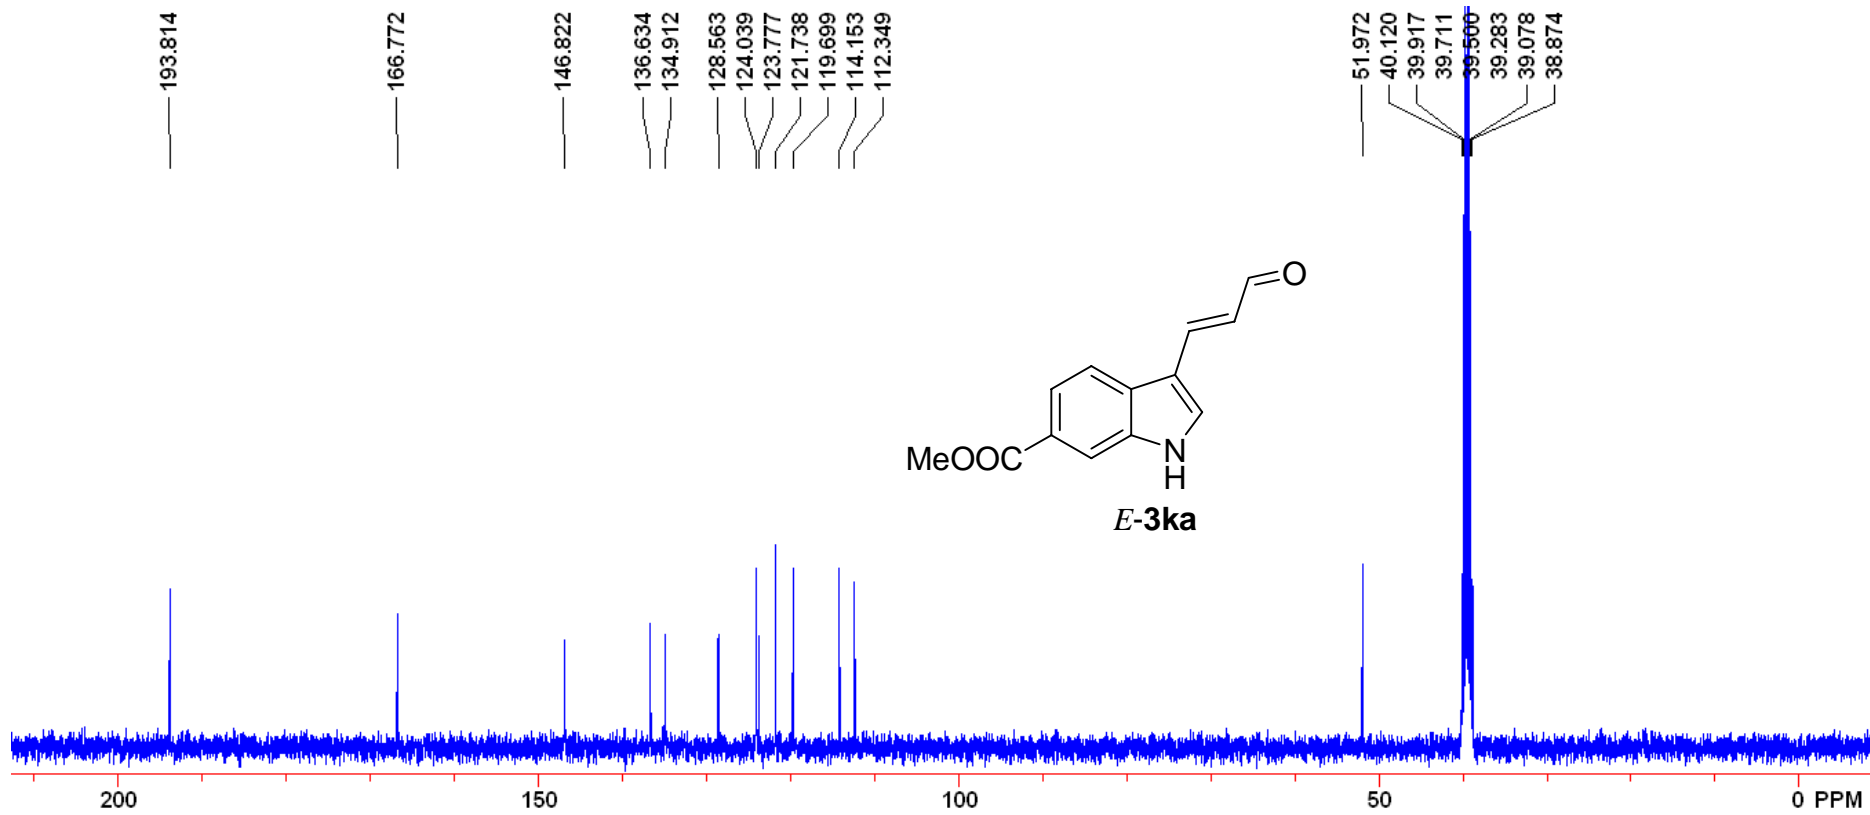



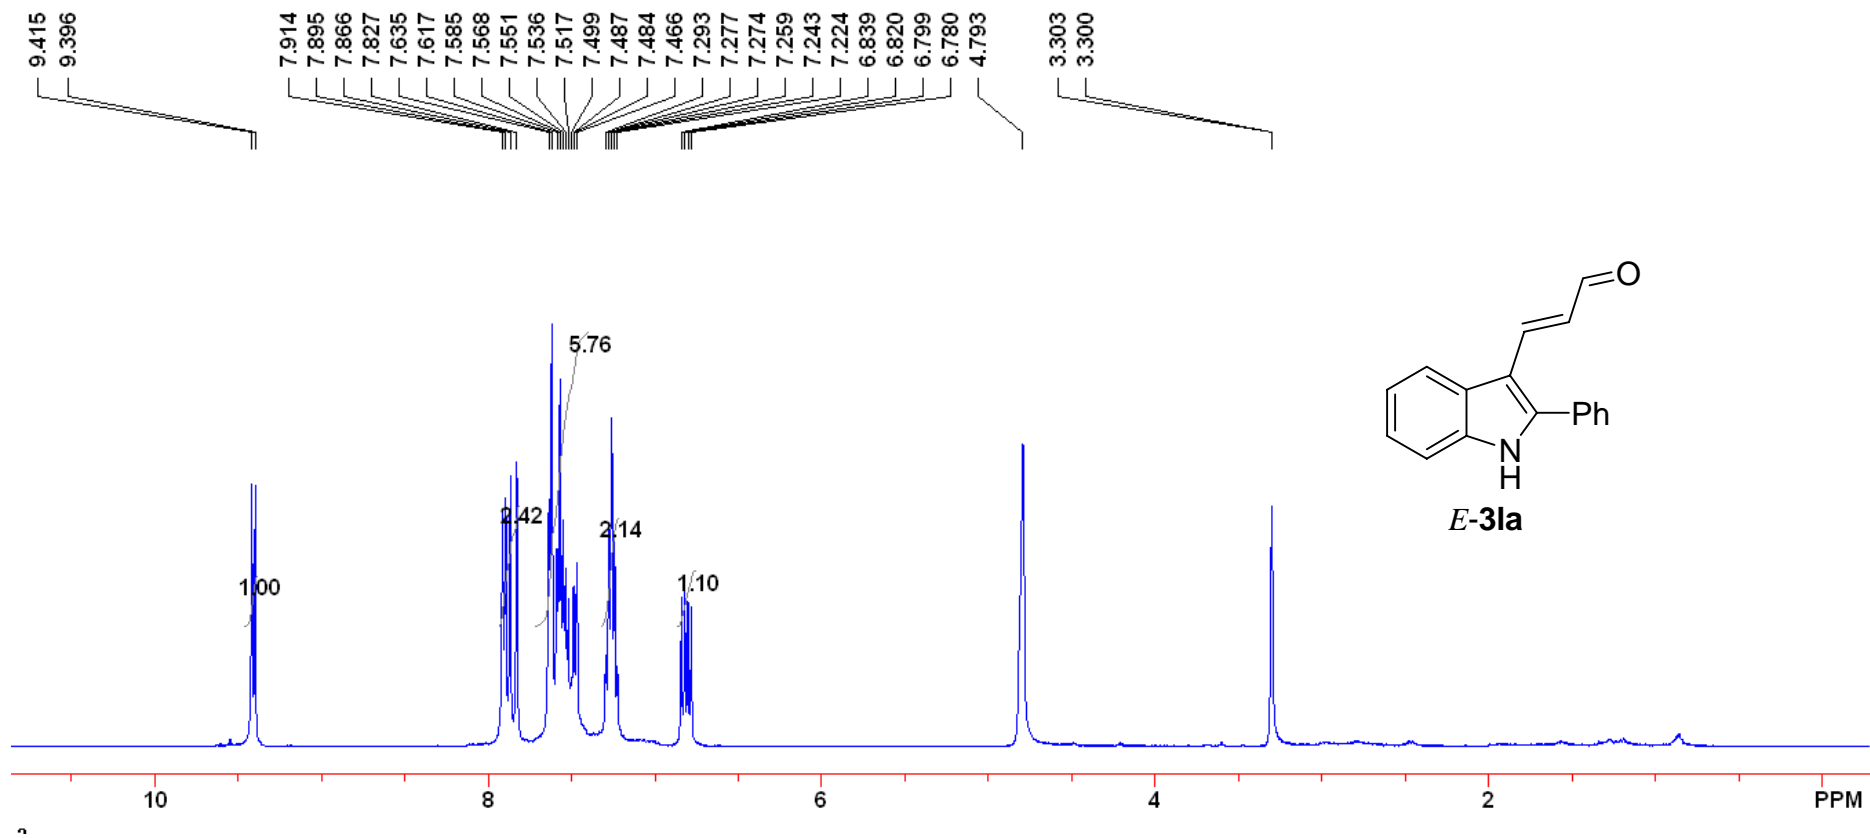

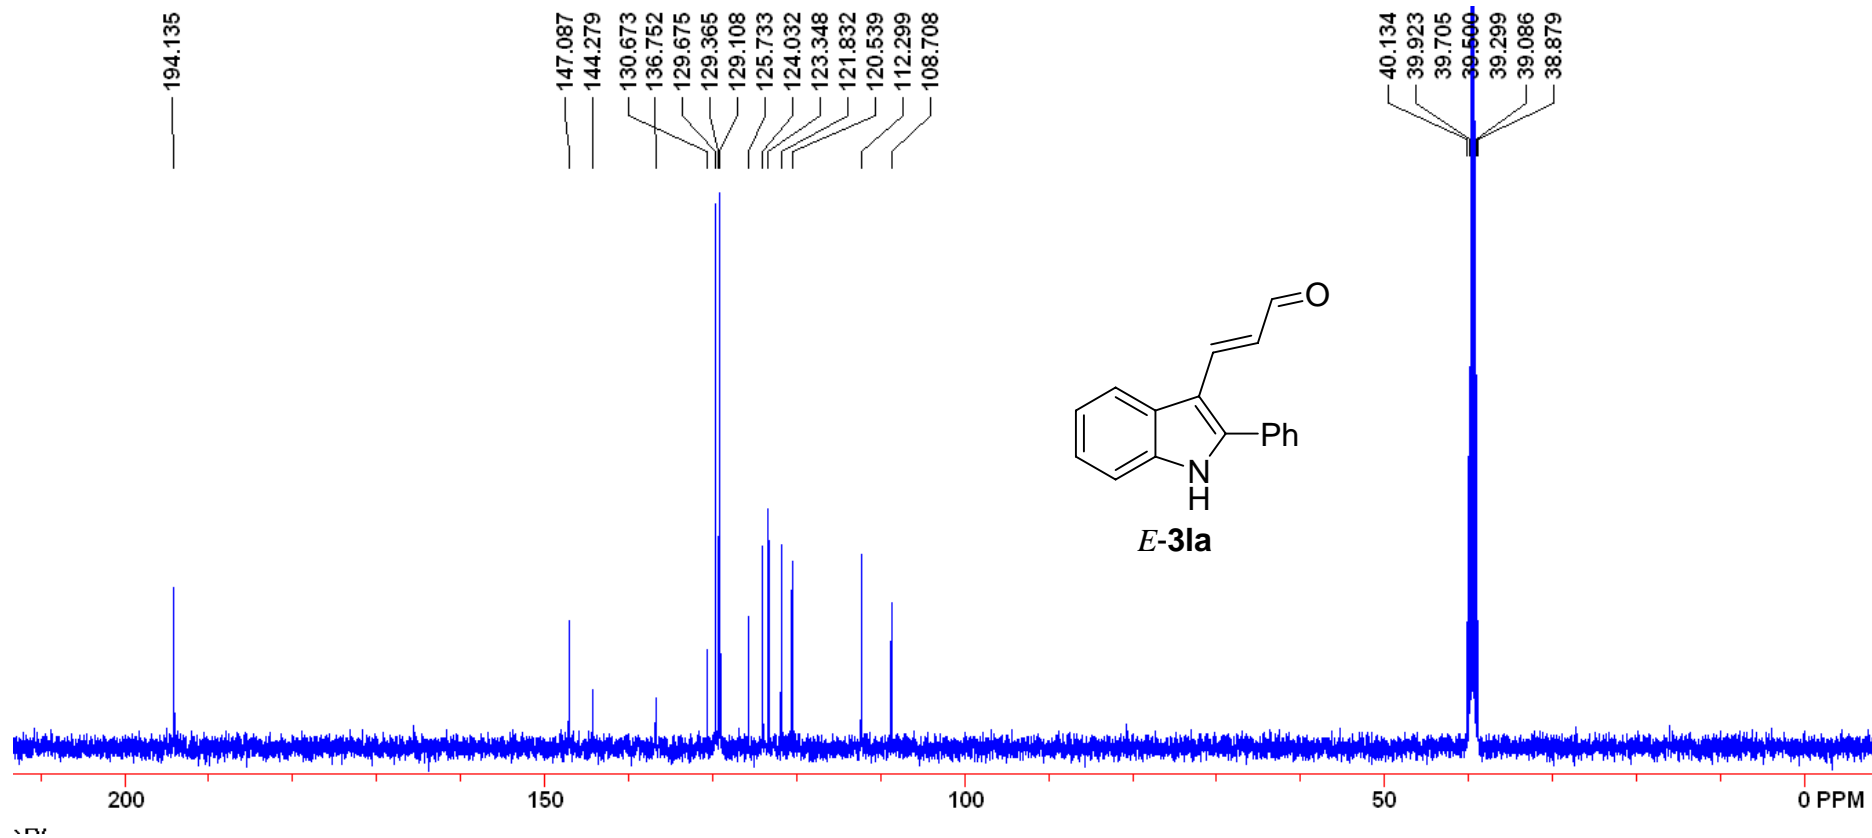

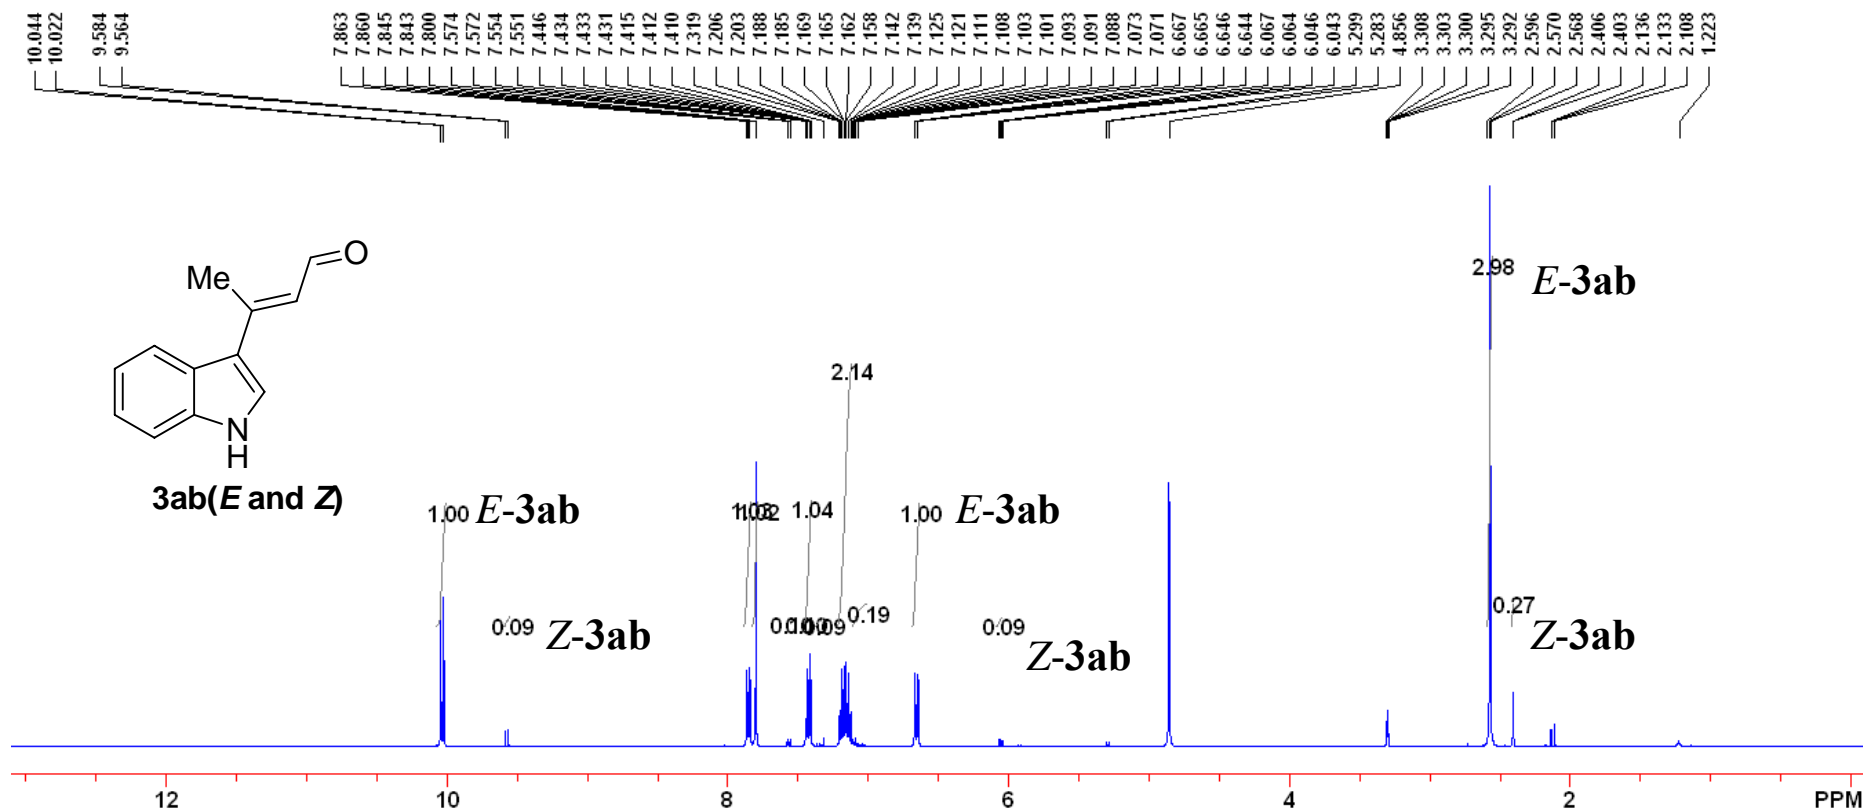

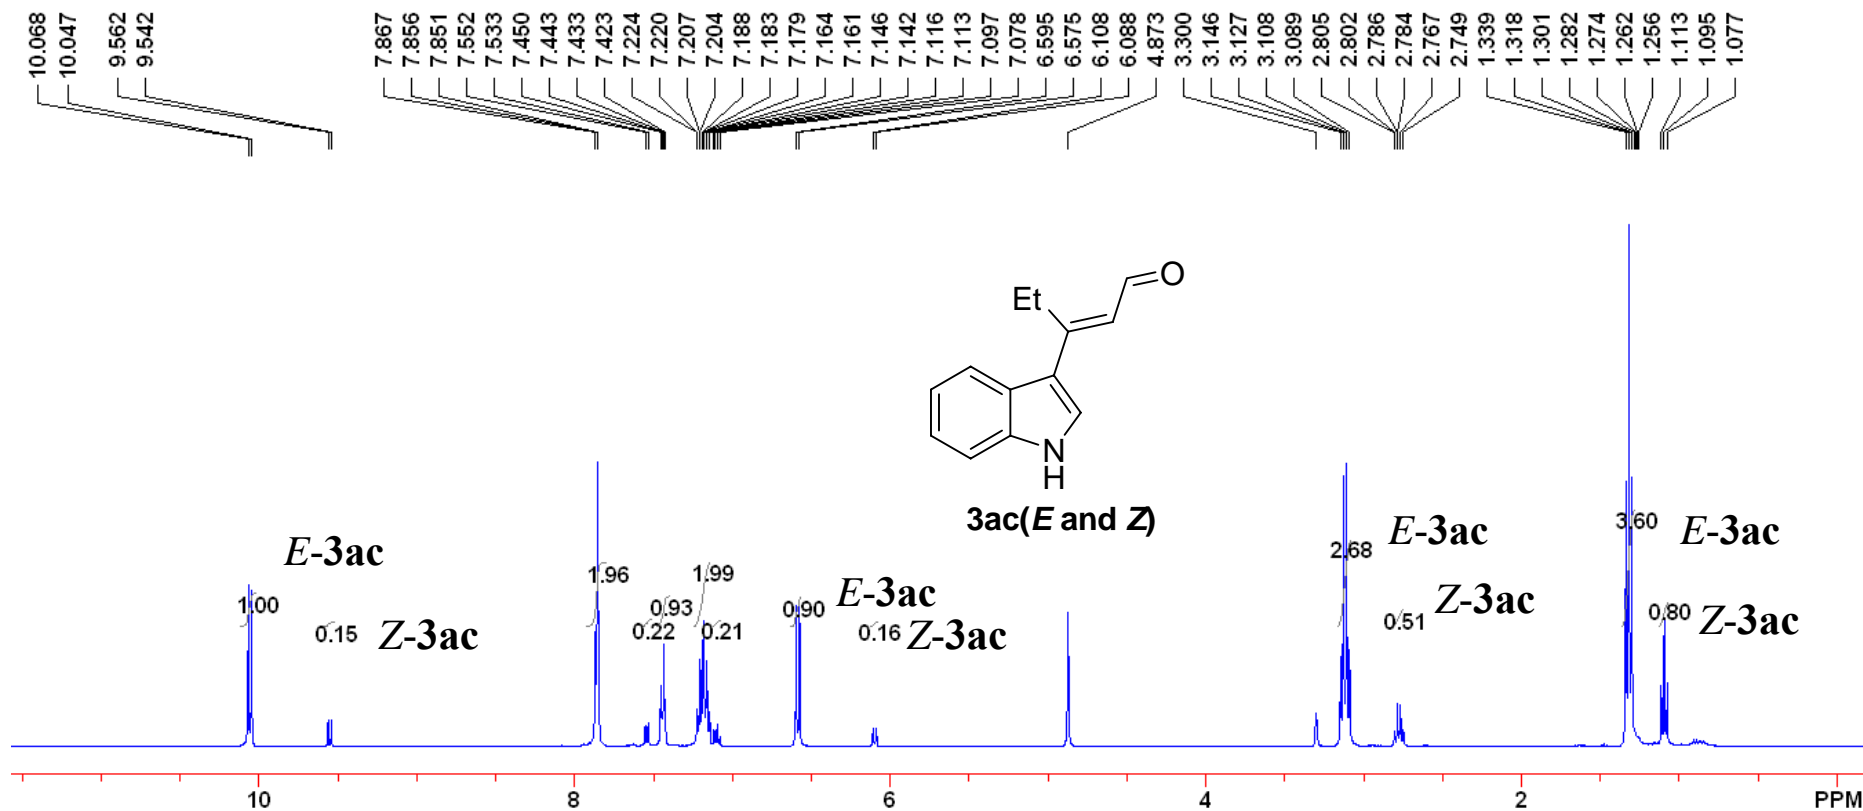

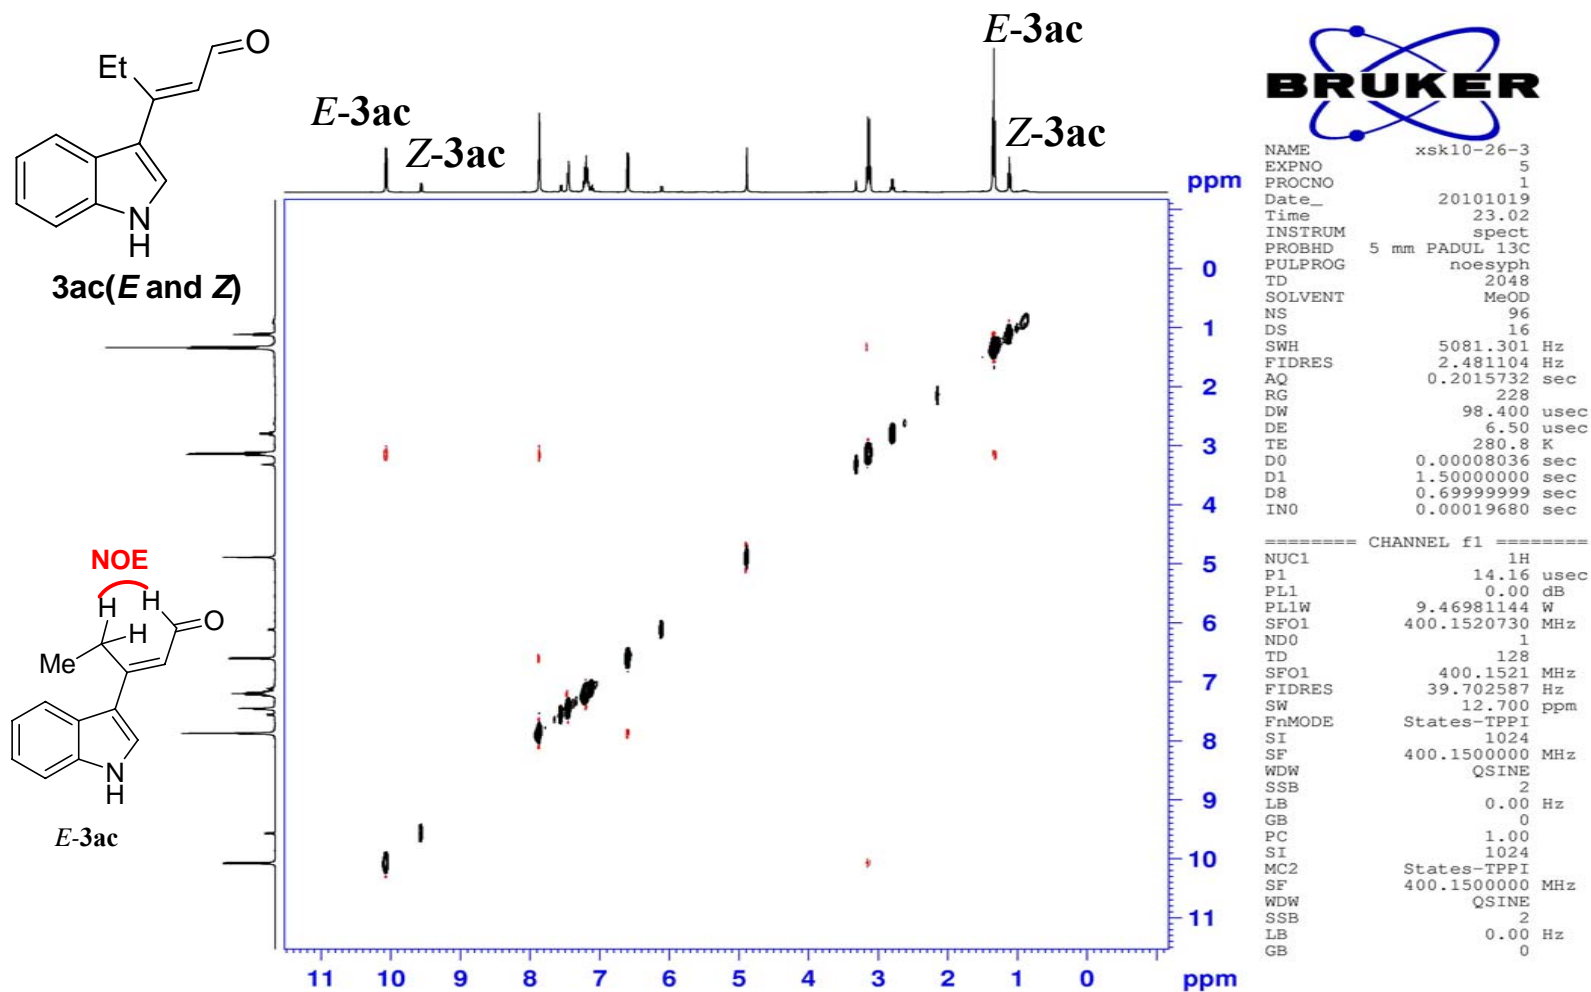

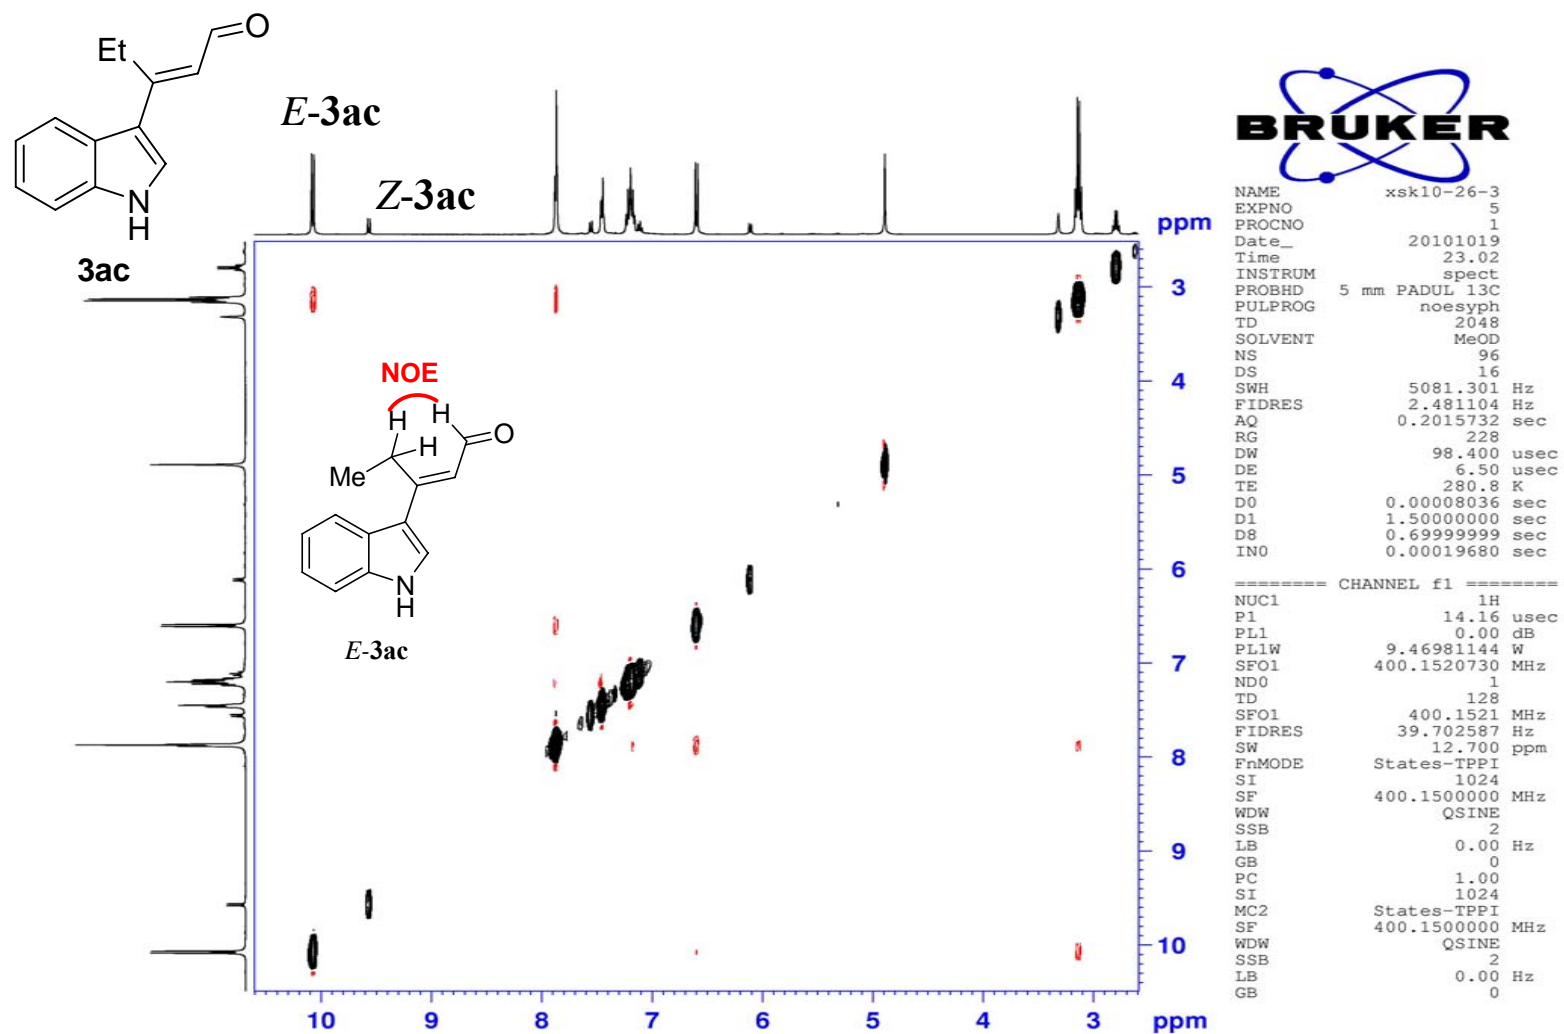

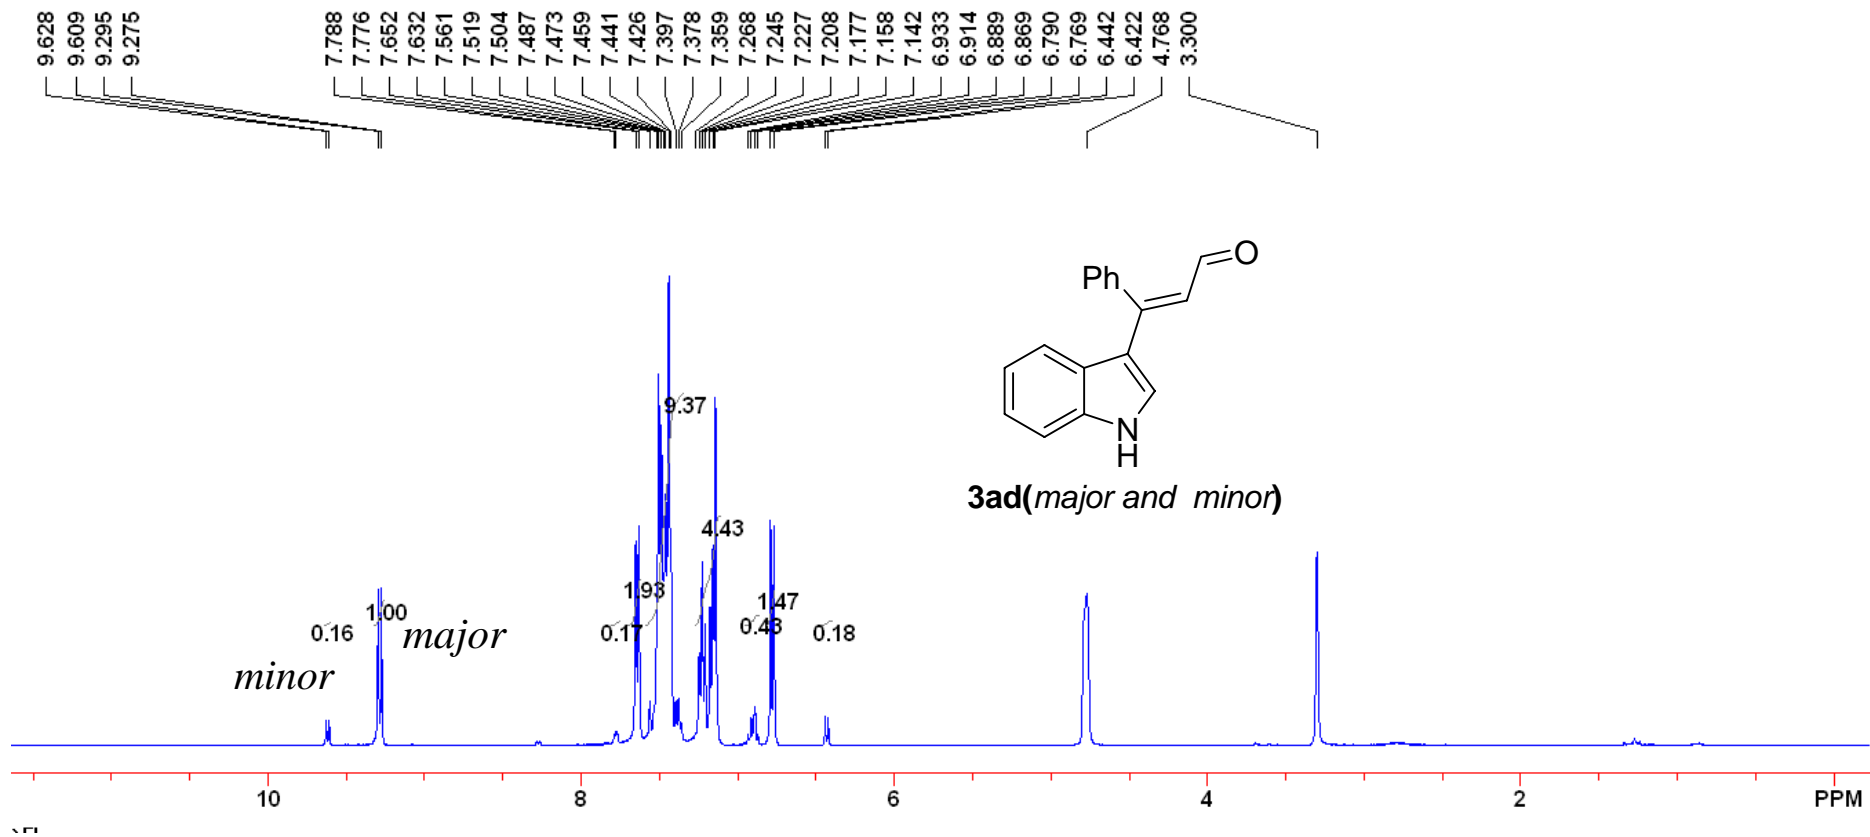

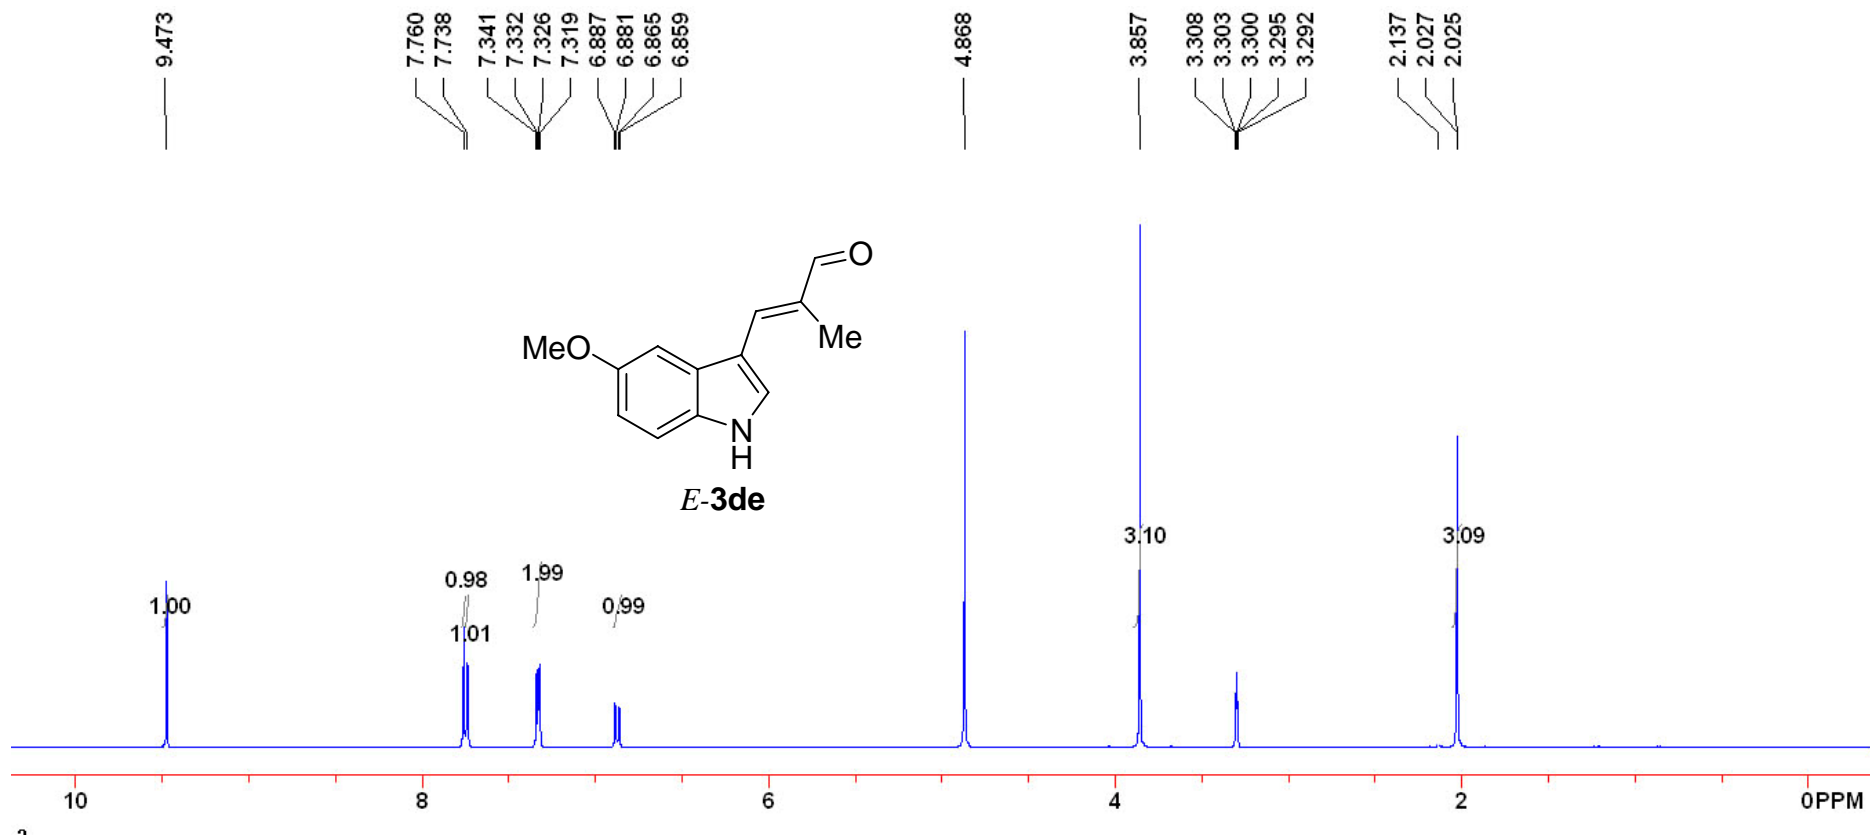



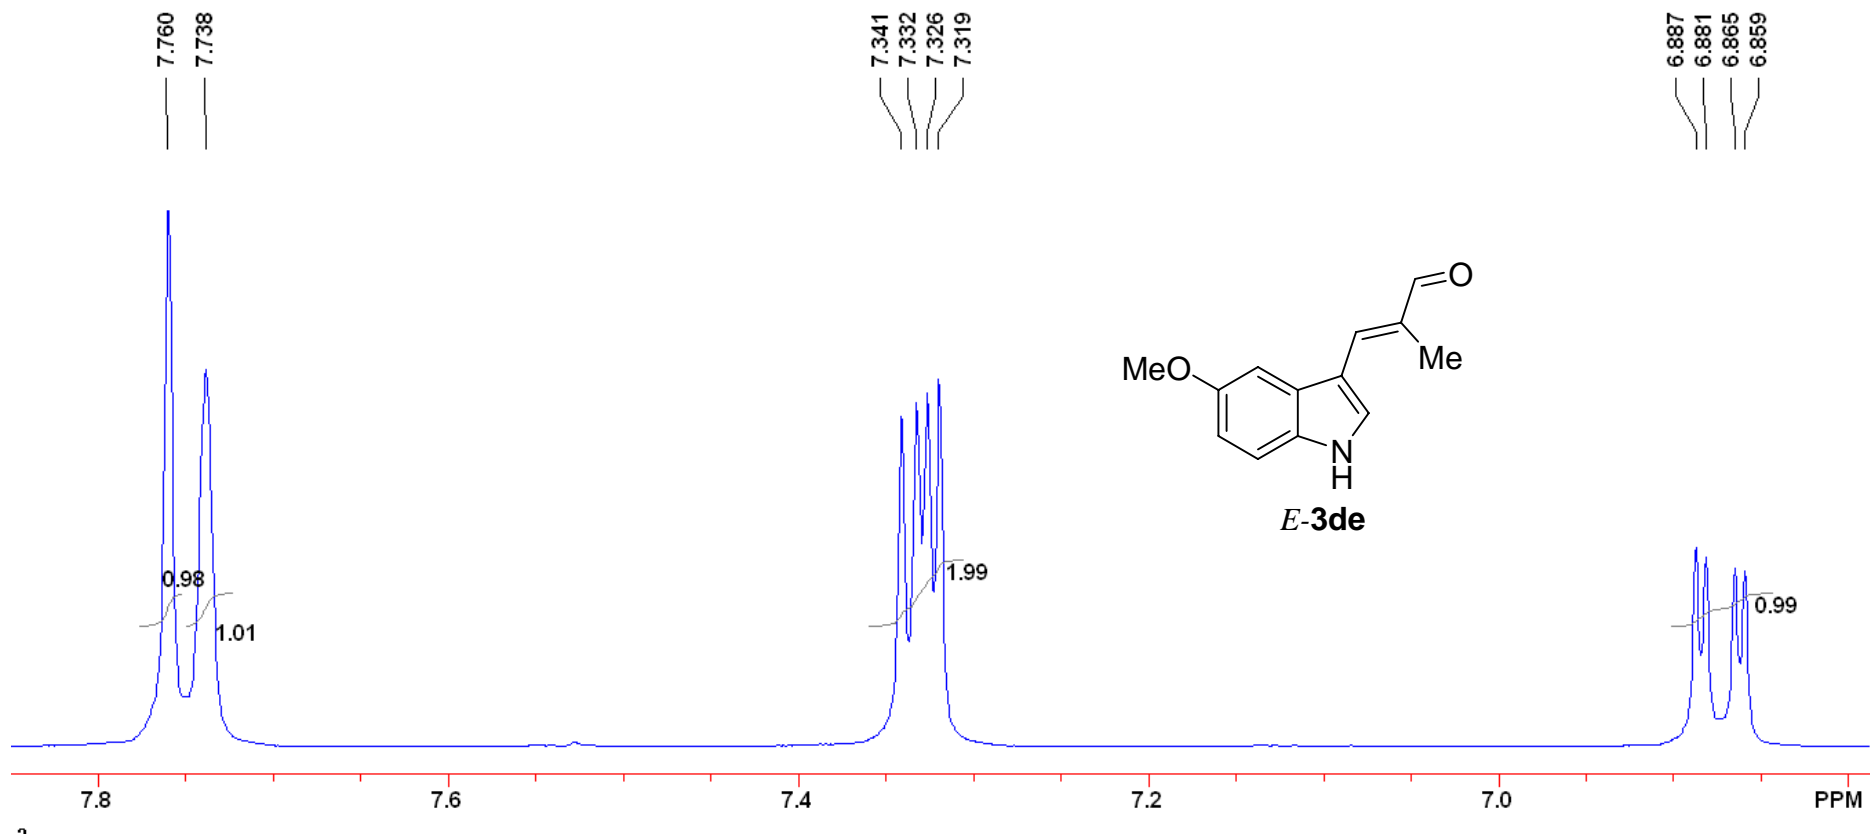

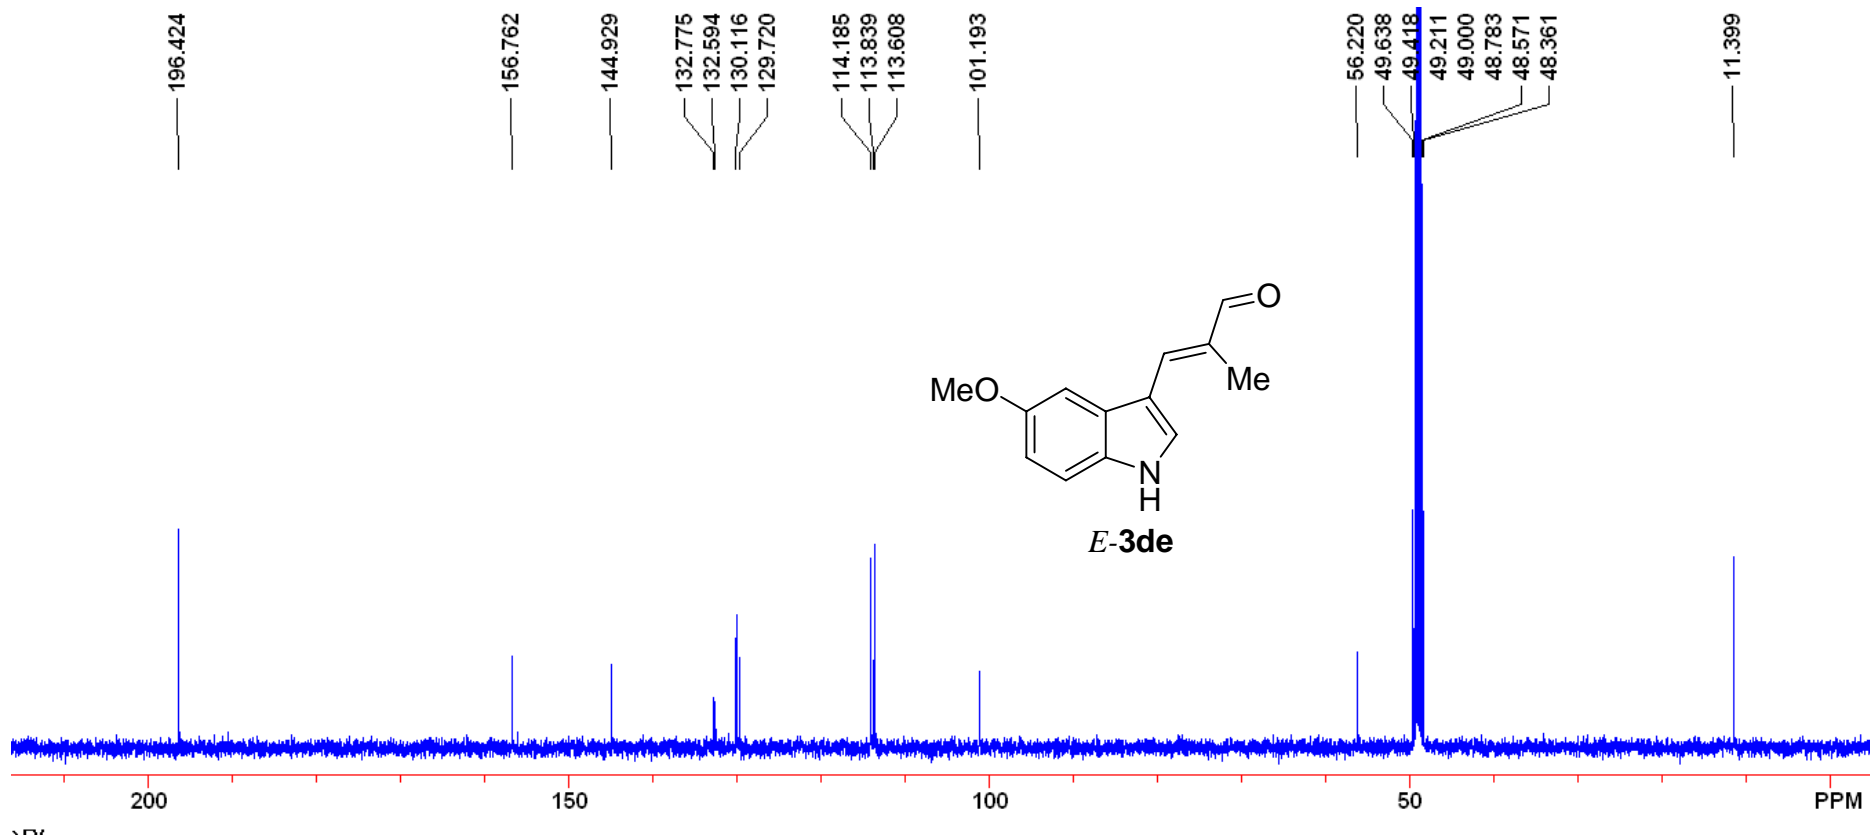

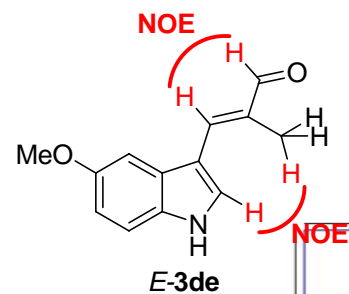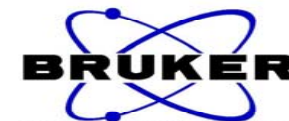

NAME xsk10-25-1 (good)  
EXPNO 5  
PROCNO 1  
Date\_ 20101020  
Time 23.19  
INSTRUM spect  
PROBHD 5 mm PADUL 13C  
PULPROG noesyph  
TD 2048  
SOLVENT MeOD  
NS 96  
DS 16  
SWH 4807.692 Hz  
FIDRES 2.347506 Hz  
AQ 0.2130420 sec  
RG 322  
DW 104.000 usec  
DE 6.50 usec  
TE 279.8 K  
D0 0.00008610 sec  
D1 1.50000000 sec  
D8 0.69999999 sec  
IN0 0.00020825 sec

----- CHANNEL f1 -----  
NUC1 1H  
P1 14.16 usec  
PL1 0.00 dB  
PL1W 9.46981144 W  
SFO1 400.1520650 MHz  
ND0 1  
TD 128  
SFO1 400.1521 MHz  
FIDRES 37.514256 Hz  
SW 12.000 ppm  
FnMODE States-TPPI  
SI 1024  
SF 400.1500038 MHz  
WDW QSINE  
SSB 2  
LB 0.00 Hz  
GB 0  
PC 1.00  
SI 1024  
MC2 States-TPPI  
SF 400.1500031 MHz  
WDW QSINE  
SSB 2  
LB 0.00 Hz  
GB 0

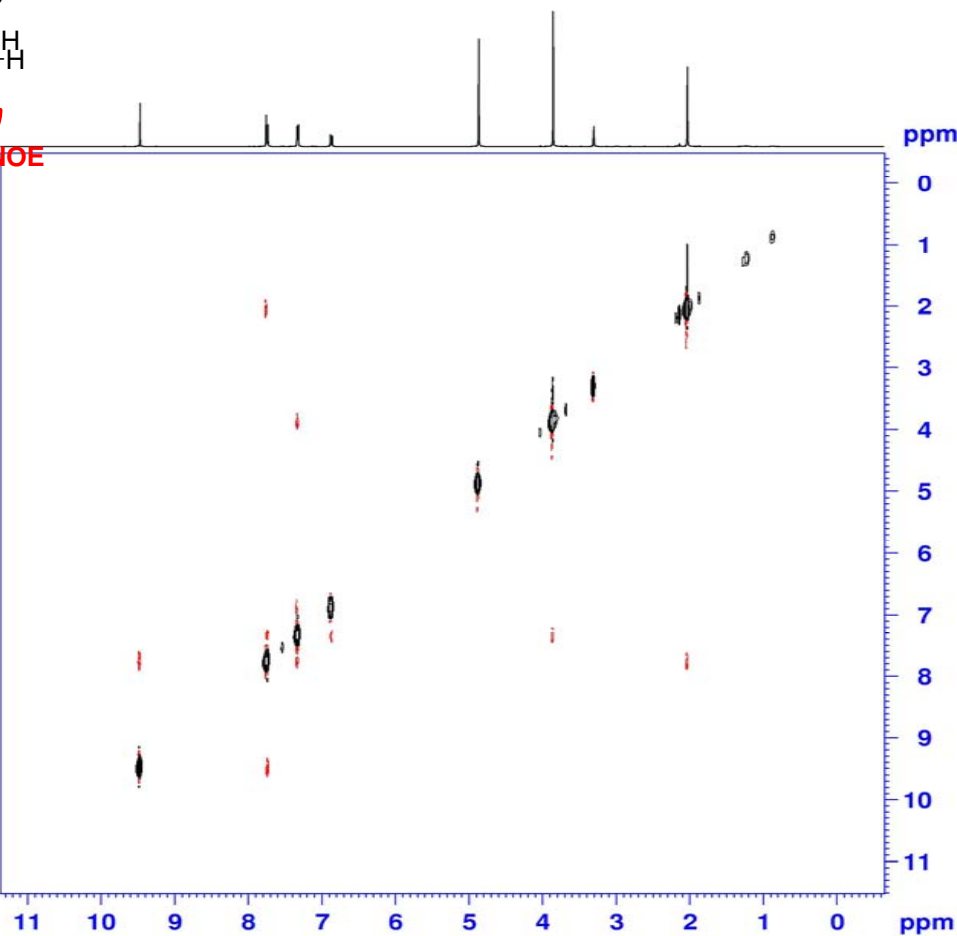

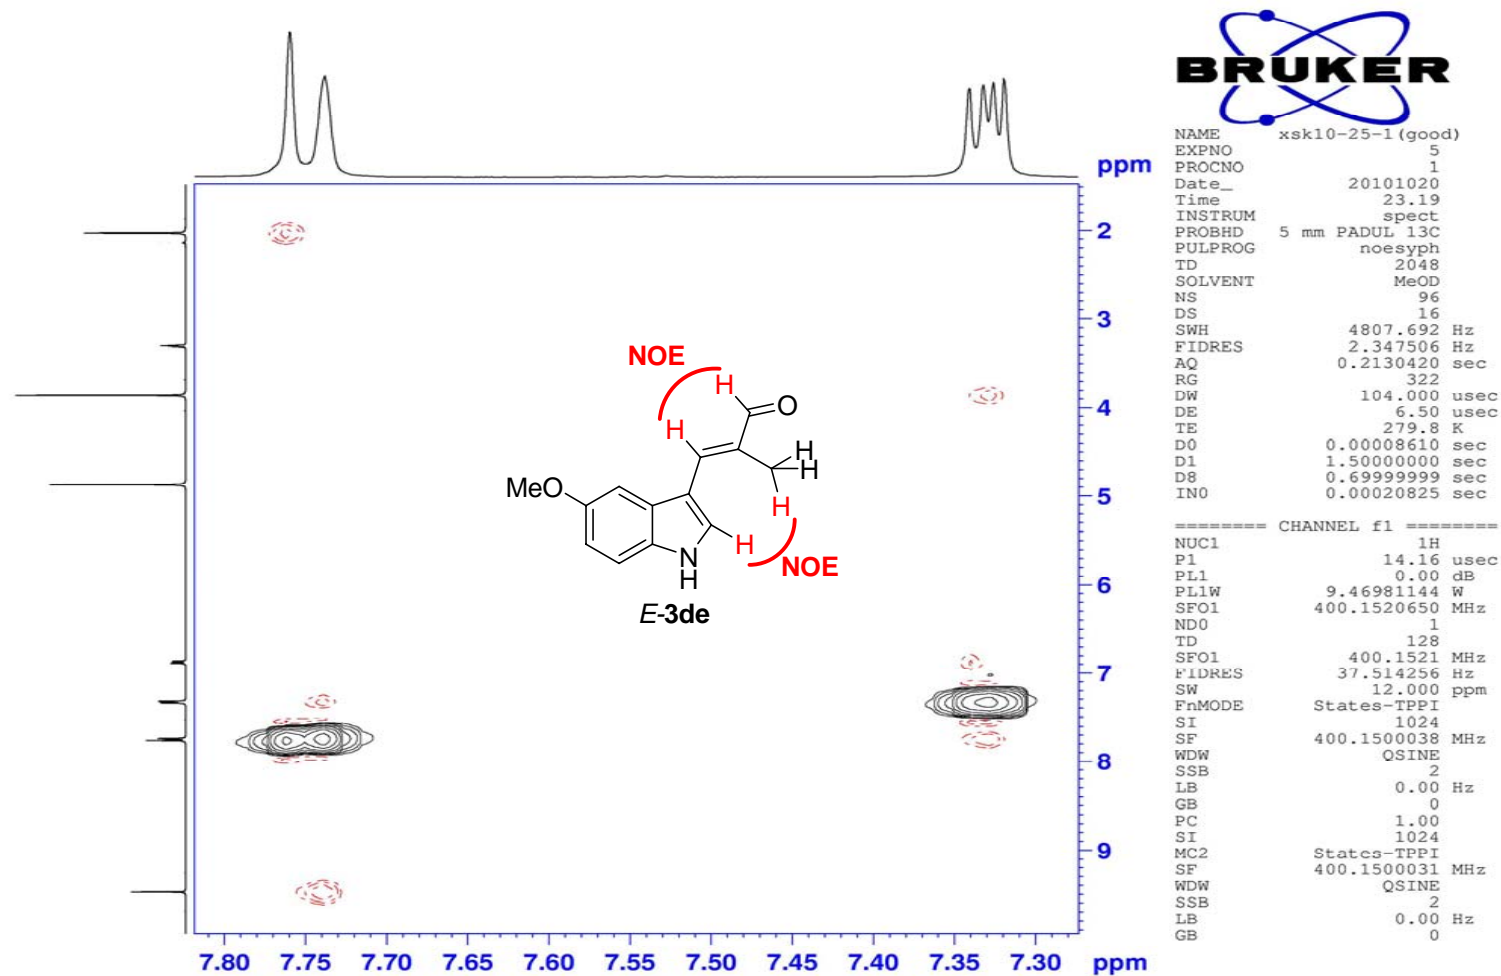

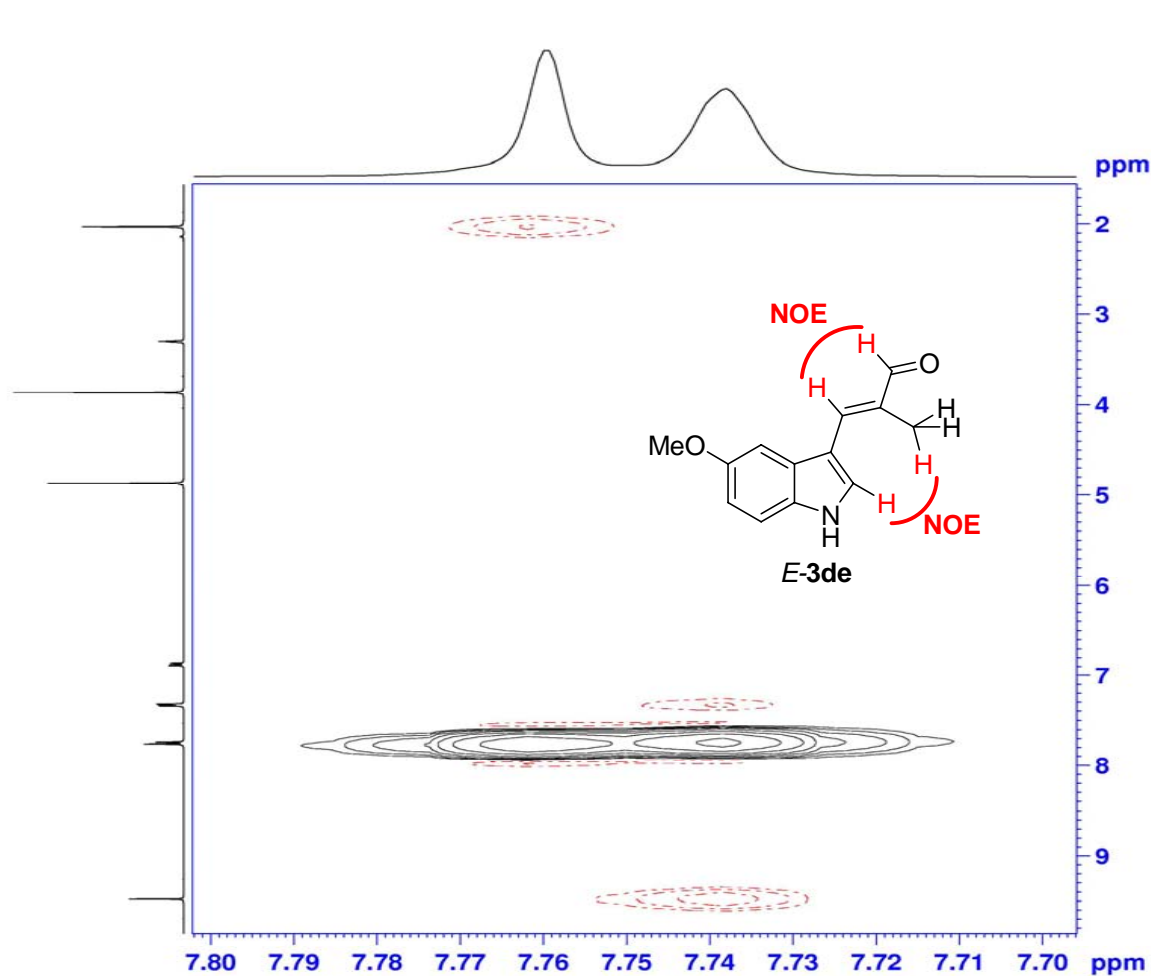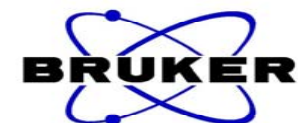

NAME xsk10-25-1 (good)  
EXPNO 5  
PROCNO 1  
Date\_ 20101020  
Time 23.19  
INSTRUM spect  
PROBHD 5 mm PADUL 13C  
PULPROG noesyph  
TD 2048  
SOLVENT MeOD  
NS 96  
DS 16  
SWH 4807.692 Hz  
FIDRES 2.347506 Hz  
AQ 0.2130420 sec  
RG 322  
DW 104.000 usec  
DE 6.50 usec  
TE 279.8 K  
D0 0.00008610 sec  
D1 1.50000000 sec  
D8 0.69999999 sec  
IN0 0.00020825 sec

===== CHANNEL f1 =====  
NUC1 1H  
P1 14.16 usec  
PL1 0.00 dB  
PL1W 9.46981144 W  
SFO1 400.1520650 MHz  
ND0 1  
TD 128  
SFO1 400.1521 MHz  
FIDRES 37.514256 Hz  
SW 12.000 ppm  
FnMODE States-TPPI  
SI 1024  
SF 400.1500038 MHz  
WDW QSINE  
SSB 2  
LB 0.00 Hz  
GB 0  
PC 1.00  
SI 1024  
MC2 States-TPPI  
SF 400.1500031 MHz  
WDW QSINE  
SSB 2  
LB 0.00 Hz  
GB 0

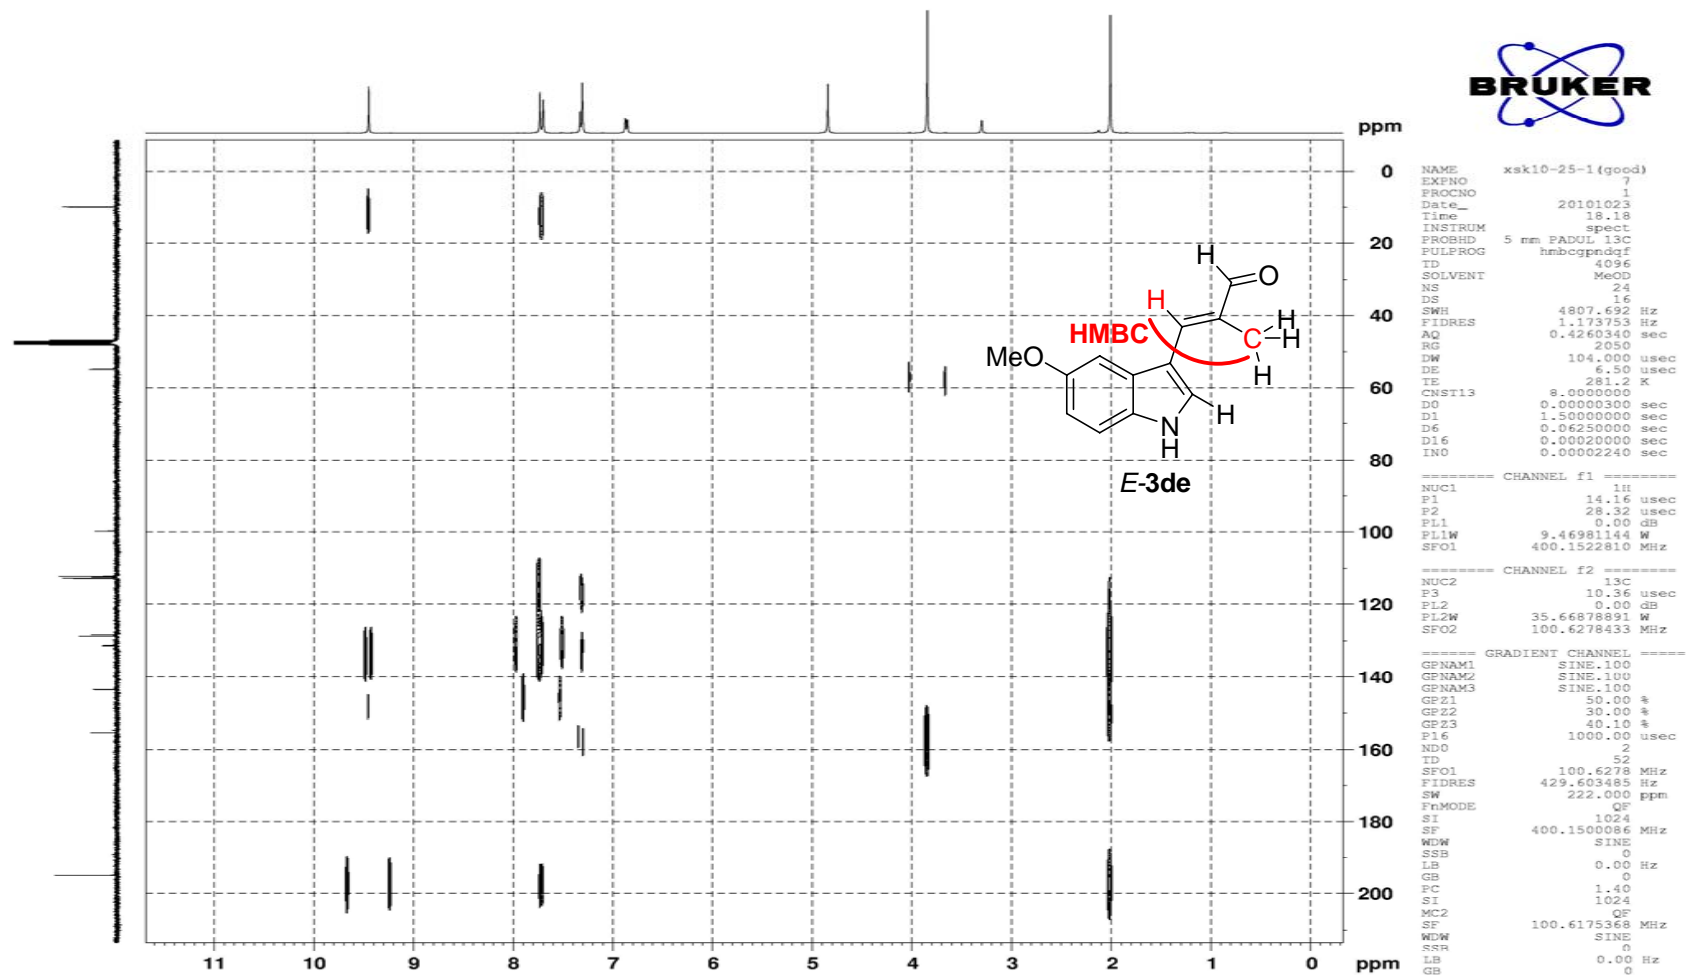

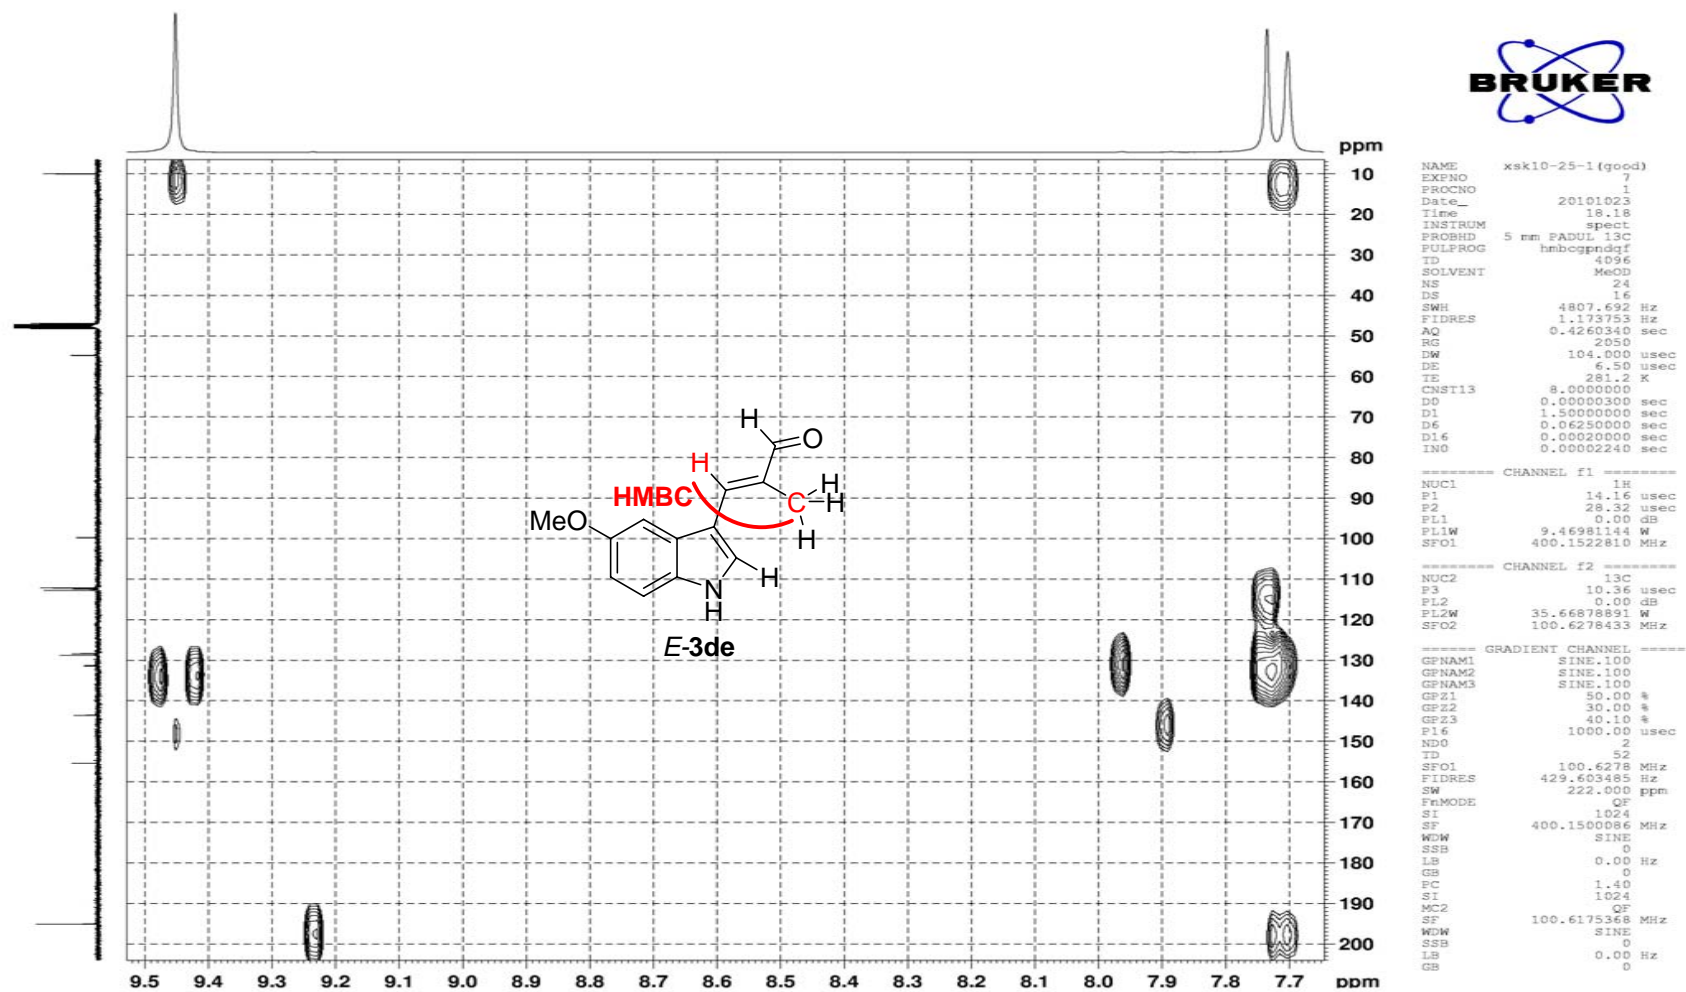

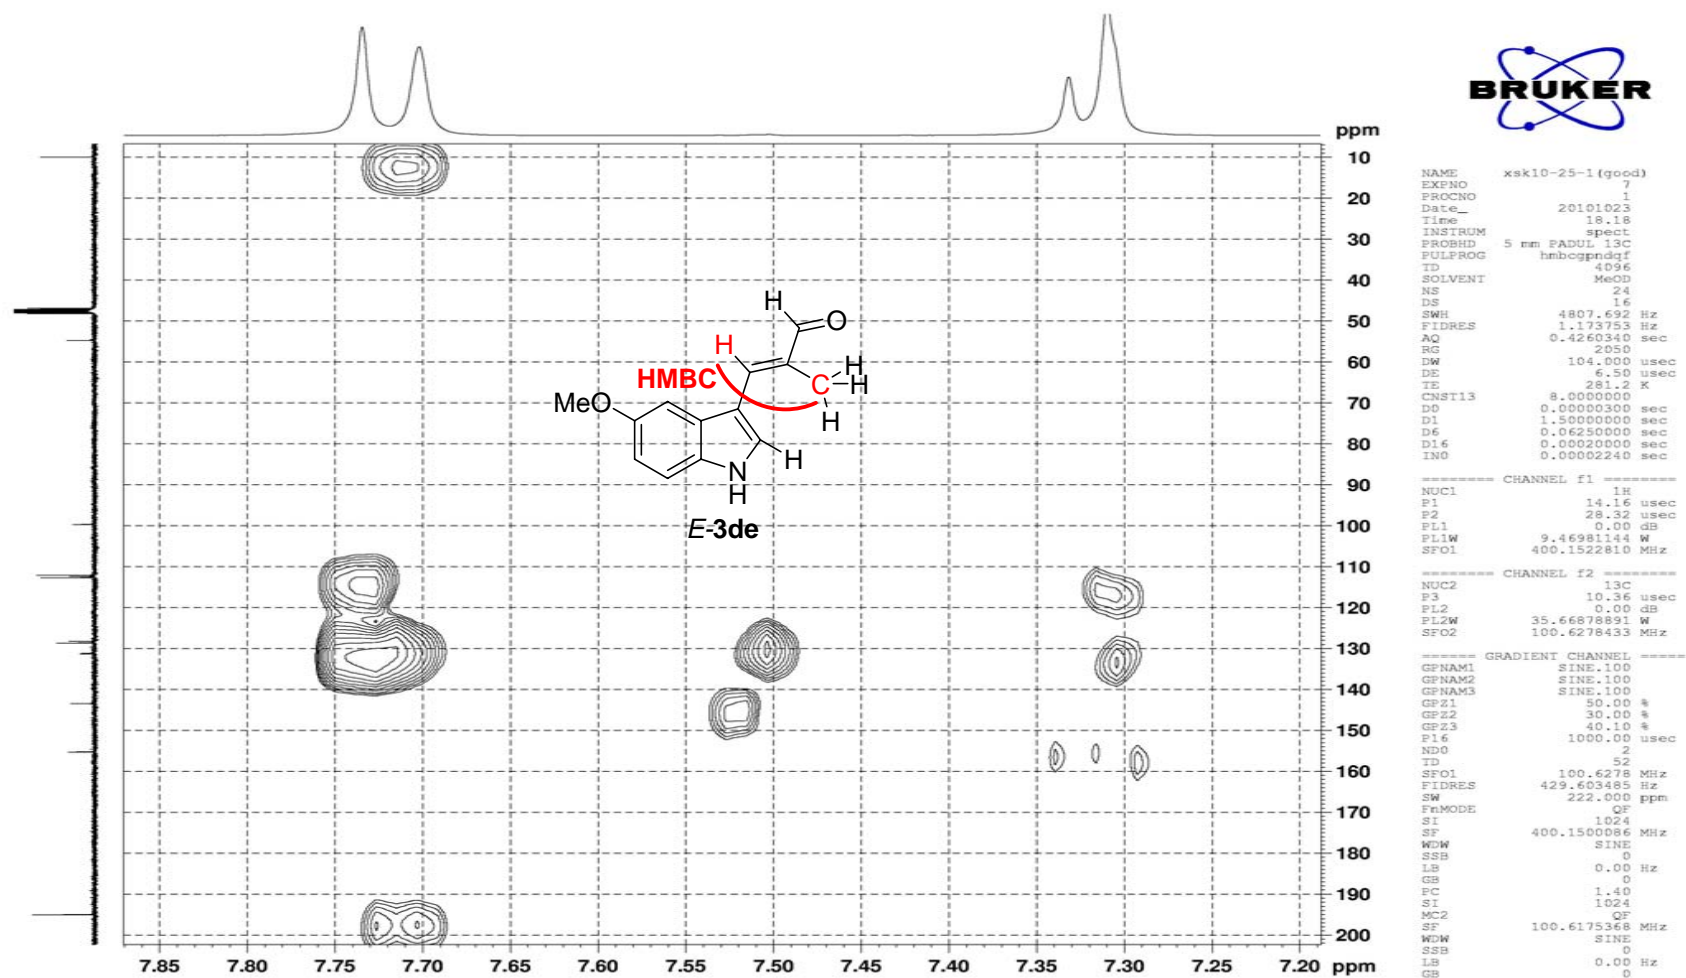



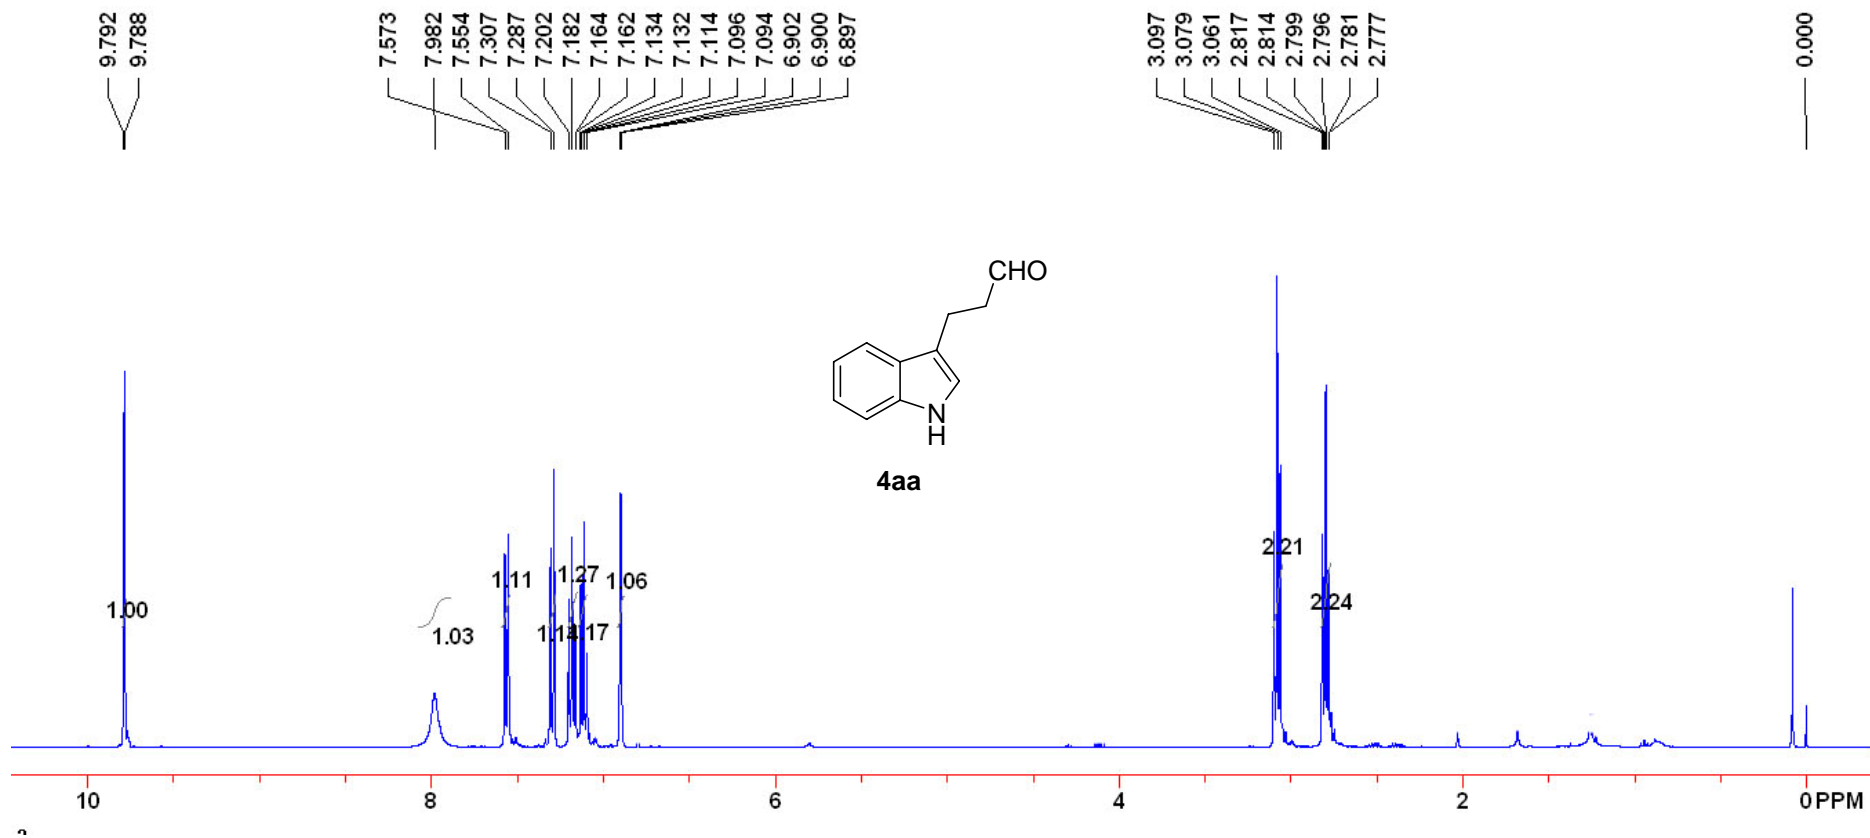

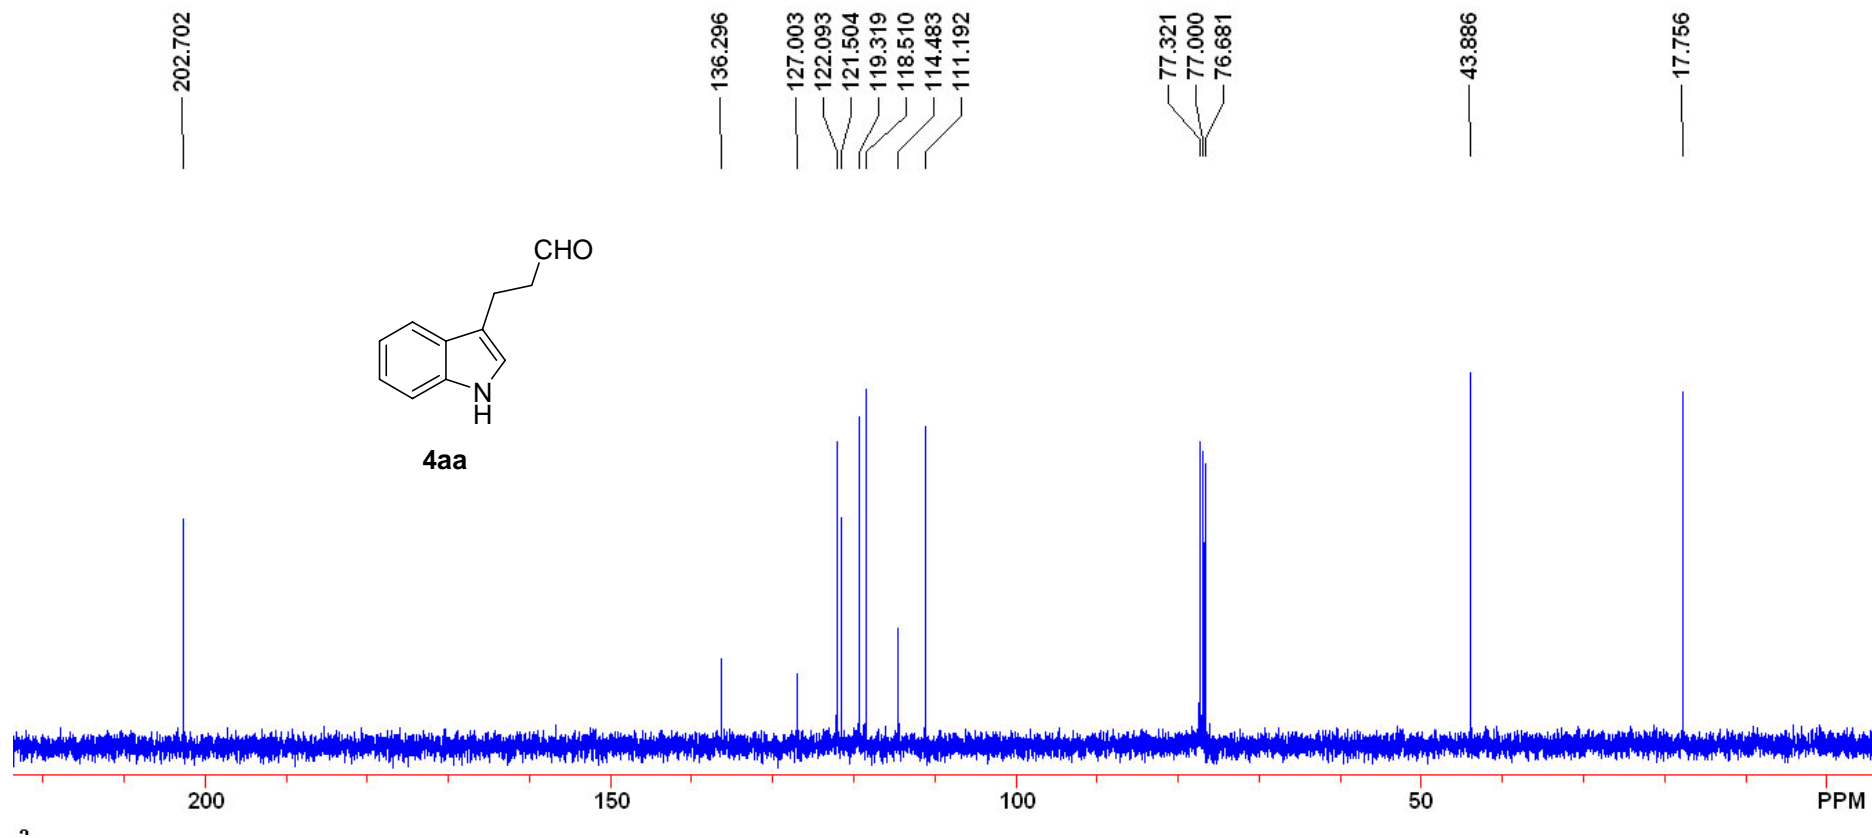

Supplement: c1cc12220g.pdf [file c1cc12220g.pdf]
